# Supplementary material for: High-Density Mapping of Triple Rust Resistance in Barley Using DArT-Seq Markers
Source: Front Plant Sci. 2019 Apr 26;10:467. doi: 10.3389/fpls.2019.00467 (PMC6498947; doi:10.3389/fpls.2019.00467)
Supplement: TABLE S1 — Summarised marker information for the high-density linkage map constructed for the Pompadour/Biosaline-19 RIL population. [file Table_1.xlsx]

## Sheet: Sheet1
Unique Allele ID	Marker Type	Trunc CloneID	LG	cM	Order in LG	Allele Name	Chr in Morex assembly	Position (bp) in Morex assembly	No. positions in genome	B-19 (parent A)	Pompadour (parent B)	Segregation (p=0.01)	Recoding comment	No. Redundant markers
3265098a1	silicoDArT	3265098	1H	0	o/	chr1H|HvDArTseq-3265098a1|Freq-10|0_19679068	chr1H	19679068	1	0	1	.	.	0
4012370a1	silicoDArT	4012370	1H	9.31826	2	NA|HvDArTseq-4012370a1|Freq-10|7602_0	NA	0	0	1	0	.	.	0
6436646a1	silicoDArT	6436646	1H	11.3346	3	chr1H|HvDArTseq-6436646a1|Freq-10|0_931029	chr1H	931029	1	1	0	.	.	0
3266336a1	silicoDArT	3266336	1H	13.9645	4	NA|HvDArTseq-3266336a1|Freq-10|10044_0	NA	0	0	0	1	.	.	0
3273649a2	SNP	3273649	1H	13.9645	5	NA|HvDArTseq-3273649a2|Freq-10|3376_0	NA	0	0	1	0	distorted	.	7
3265687a1	silicoDArT	3265687	1H	13.9645	6	chr1H|HvDArTseq-3265687a1|Freq-10|0_782392	chr1H	782392	1	1	0	.	.	0
3914270a1	silicoDArT	3914270	1H	13.9645	7	NA|HvDArTseq-3914270a1|Freq-10|1869_0	NA	0	0	0	1	.	.	0
3985399a1	silicoDArT	3985399	1H	13.9645	8	NA|HvDArTseq-3985399a1|Freq-10|574_0	NA	0	0	0	-	.	B allele inferred (non-parental).	0
4010757a1	silicoDArT	4010757	1H	13.9645	9	chr1H|HvDArTseq-4010757a1|Freq-10|0_277639	chr1H	277639	1	1	0	.	.	0
6436167a1	silicoDArT	6436167	1H	13.9645	10	NA|HvDArTseq-6436167a1|Freq-10|2996_0	NA	0	0	1	0	.	.	0
3917084a1	silicoDArT	3917084	1H	13.9645	11	NA|HvDArTseq-3917084a1|Freq-10|5211_0	NA	0	0	1	0	.	.	0
3272103a2	SNP	3272103	1H	14.5471	12	NA|HvDArTseq-3272103a2|Freq-10|7633_0	NA	0	0	2	1	.	.	2
3985583a1	silicoDArT	3985583	1H	14.5471	13	chr1H|HvDArTseq-3985583a1|Freq-10|0_684906	chr1H	684906	1	0	1	.	.	0
3265853a1	silicoDArT	3265853	1H	14.5471	14	NA|HvDArTseq-3265853a1|Freq-10|1130_0	NA	0	0	-	0	.	A allele inferred (non-parental).	0
3268604a1	silicoDArT	3268604	1H	14.5471	15	NA|HvDArTseq-3268604a1|Freq-10|9468_0	NA	0	0	-	0	.	A allele inferred (non-parental).	0
3272103a1	silicoDArT	3272103	1H	14.5471	16	NA|HvDArTseq-3272103a1|Freq-10|6712_0	NA	0	0	-	0	.	A allele inferred (non-parental).	0
4011704a1	silicoDArT	4011704	1H	15.6837	17	NA|HvDArTseq-4011704a1|Freq-10|432_0	NA	0	0	1	0	.	.	0
3255561a1	SNP	3255561	1H	16.2845	18	chr1H|HvDArTseq-3255561a1|Freq-10|0_263571	chr1H	263571	1	0	1	.	.	1
4190258a1	silicoDArT	4190258	1H	16.2845	19	NA|HvDArTseq-4190258a1|Freq-10|248_0	NA	0	0	0	1	.	.	0
3256790a1	SNP	3256790	1H	16.2845	20	chr1H|HvDArTseq-3256790a1|Freq-10|0_51807	chr1H	51807	1	1	0	distorted	.	0
4014890a1	silicoDArT	4014890	1H	16.2845	21	NA|HvDArTseq-4014890a1|Freq-10|5436_0	NA	0	0	1	0	.	.	0
6435648a1	silicoDArT	6435648	1H	18.2605	22	NA|HvDArTseq-6435648a1|Freq-10|9638_0	NA	0	0	1	0	.	.	0
3927391a1	silicoDArT	3927391	1H	21.5378	23	NA|HvDArTseq-3927391a1|Freq-10|10557_0	NA	0	0	0	1	.	.	0
3256410a1	silicoDArT	3256410	1H	21.5378	24	chr1H|HvDArTseq-3256410a1|Freq-10|0_277639	chr1H	277639	1	0	1	.	.	0
5246080a1	silicoDArT	5246080	1H	24.8003	25	NA|HvDArTseq-5246080a1|Freq-10|732_0	NA	0	0	0	1	.	.	1
4790768a1	silicoDArT	4790768	1H	29.5085	26	NA|HvDArTseq-4790768a1|Freq-10|6459_0	NA	0	0	0	1	.	.	0
3986115a1	silicoDArT	3986115	1H	31.2992	27	NA|HvDArTseq-3986115a1|Freq-10|2069_0	NA	0	0	0	1	.	.	0
3985777a1	silicoDArT	3985777	1H	31.2992	28	NA|HvDArTseq-3985777a1|Freq-10|2182_0	NA	0	0	0	1	.	.	0
3985649a1	silicoDArT	3985649	1H	31.2992	29	NA|HvDArTseq-3985649a1|Freq-10|6426_0	NA	0	0	0	1	.	.	0
4191605a1	silicoDArT	4191605	1H	32.3202	30	NA|HvDArTseq-4191605a1|Freq-10|3707_0	NA	0	0	0	1	.	.	0
3268042a1	silicoDArT	3268042	1H	32.3202	31	NA|HvDArTseq-3268042a1|Freq-10|6328_0	NA	0	0	0	1	.	.	0
3987349a1	silicoDArT	3987349	1H	33.3888	32	NA|HvDArTseq-3987349a1|Freq-10|7756_0	NA	0	0	0	1	.	.	0
7751587a1	SNP	7751587	1H	35.3203	33	chrUn|HvDArTseq-7751587a1|Freq-10|0_143662	chrUn	143662	1	0	2	.	.	13
3661695a1	silicoDArT	3661695	1H	35.3203	34	chrUn|HvDArTseq-3661695a1|Freq-10|0_149888	chrUn	149888	1	0	1	.	.	0
3985423a1	silicoDArT	3985423	1H	35.3203	35	NA|HvDArTseq-3985423a1|Freq-10|4603_0	NA	0	0	0	1	.	.	0
3268075a1	silicoDArT	3268075	1H	35.3203	36	NA|HvDArTseq-3268075a1|Freq-10|6360_0	NA	0	0	0	1	.	.	0
3920288a1	silicoDArT	3920288	1H	35.3203	37	NA|HvDArTseq-3920288a1|Freq-10|3568_0	NA	0	0	0	1	.	.	0
3987214a1	silicoDArT	3987214	1H	35.3203	38	NA|HvDArTseq-3987214a1|Freq-10|1368_0	NA	0	0	1	0	.	.	0
6436291a1	silicoDArT	6436291	1H	35.3203	39	NA|HvDArTseq-6436291a1|Freq-10|4954_0	NA	0	0	1	0	.	.	0
3268873a1	silicoDArT	3268873	1H	35.8821	40	NA|HvDArTseq-3268873a1|Freq-10|6321_0	NA	0	0	1	0	.	.	0
6437197a1	silicoDArT	6437197	1H	35.8821	41	chr1H|HvDArTseq-6437197a1|Freq-10|0_2139186	chr1H	2139186	1	1	0	.	.	0
3985722a1	silicoDArT	3985722	1H	35.8821	42	NA|HvDArTseq-3985722a1|Freq-10|1506_0	NA	0	0	0	1	.	.	0
3274140a1	silicoDArT	3274140	1H	37.0376	43	NA|HvDArTseq-3274140a1|Freq-10|1959_0	NA	0	0	0	1	.	.	0
7751587a2	SNP	7751587	1H	37.9698	44	chrUn|HvDArTseq-7751587a2|Freq-10|0_143662	chrUn	143662	1	0	2	.	.	10
6437238a1	silicoDArT	6437238	1H	37.9698	45	chr1H|HvDArTseq-6437238a1|Freq-10|0_2112997	chr1H	2112997	1	1	0	.	.	0
3985787a1	silicoDArT	3985787	1H	37.9698	46	chrUn|HvDArTseq-3985787a1|Freq-10|0_149888	chrUn	149888	1	0	1	.	.	0
6435849a1	silicoDArT	6435849	1H	37.9698	47	chr1H|HvDArTseq-6435849a1|Freq-10|0_2240035	chr1H	2240035	1	1	0	.	.	0
6436524a1	silicoDArT	6436524	1H	37.9698	48	NA|HvDArTseq-6436524a1|Freq-10|7469_0	NA	0	0	1	0	.	.	0
3273223a1	silicoDArT	3273223	1H	37.9698	49	NA|HvDArTseq-3273223a1|Freq-10|2748_0	NA	0	0	1	0	.	.	0
3987559a1	silicoDArT	3987559	1H	37.9698	50	chr1H|HvDArTseq-3987559a1|Freq-10|0_1512913	chr1H	1512913	1	1	0	.	.	0
4015954a1	silicoDArT	4015954	1H	37.9698	51	NA|HvDArTseq-4015954a1|Freq-10|5457_0	NA	0	0	1	0	.	.	0
3256536a1	silicoDArT	3256536	1H	37.9698	52	chr1H|HvDArTseq-3256536a1|Freq-10|0_2114635	chr1H	2114635	1	1	0	.	.	0
4012285a1	silicoDArT	4012285	1H	37.9698	53	NA|HvDArTseq-4012285a1|Freq-10|8107_0	NA	0	0	1	0	.	.	0
6436296a1	silicoDArT	6436296	1H	39.1161	54	NA|HvDArTseq-6436296a1|Freq-10|1562_0	NA	0	0	1	0	.	.	0
3986188a1	SNP	3986188	1H	39.9333	55	chr1H|HvDArTseq-3986188a1|Freq-10|0_4333084	chr1H	4333084	1	1	0	distorted	.	0
3262450a1	SNP	3262450	1H	39.9333	56	chr1H|HvDArTseq-3262450a1|Freq-10|0_4183066	chr1H	4183066	1	0	1	.	.	0
3929805a1	silicoDArT	3929805	1H	39.9333	57	NA|HvDArTseq-3929805a1|Freq-10|534_0	NA	0	0	0	1	.	.	0
3987502a1	SNP	3987502	1H	39.9333	58	chr1H|HvDArTseq-3987502a1|Freq-10|0_4667196	chr1H	4667196	1	0	1	.	.	0
3263822a2	SNP	3263822	1H	39.9333	59	NA|HvDArTseq-3263822a2|Freq-10|8075_0	NA	0	0	1	2	.	.	0
3273777a1	silicoDArT	3273777	1H	39.9333	60	NA|HvDArTseq-3273777a1|Freq-10|2369_0	NA	0	0	0	1	.	.	0
3274022a1	silicoDArT	3274022	1H	39.9333	61	chr1H|HvDArTseq-3274022a1|Freq-10|0_4667131	chr1H	4667131	1	1	0	.	.	0
3985585a1	silicoDArT	3985585	1H	39.9333	62	NA|HvDArTseq-3985585a1|Freq-10|8961_0	NA	0	0	0	1	.	.	0
3432858a1	silicoDArT	3432858	1H	39.9333	63	NA|HvDArTseq-3432858a1|Freq-10|306_0	NA	0	0	0	1	.	.	0
3918542a1	silicoDArT	3918542	1H	39.9333	64	chr1H|HvDArTseq-3918542a1|Freq-10|0_4949813	chr1H	4949813	1	0	1	.	.	0
3985658a1	silicoDArT	3985658	1H	39.9333	65	NA|HvDArTseq-3985658a1|Freq-10|2428_0	NA	0	0	0	1	.	.	0
3985766a1	silicoDArT	3985766	1H	39.9333	66	NA|HvDArTseq-3985766a1|Freq-10|2263_0	NA	0	0	0	1	.	.	0
3985962a1	silicoDArT	3985962	1H	39.9333	67	NA|HvDArTseq-3985962a1|Freq-10|4285_0	NA	0	0	0	1	.	.	0
3272213a1	silicoDArT	3272213	1H	39.9333	68	NA|HvDArTseq-3272213a1|Freq-10|9836_0	NA	0	0	0	1	.	.	0
3913351a1	silicoDArT	3913351	1H	39.9333	69	chr1H|HvDArTseq-3913351a1|Freq-10|0_4207781	chr1H	4207781	1	1	0	.	.	0
4171193a2	SNP	4171193	1H	39.9333	70	chr1H|HvDArTseq-4171193a2|Freq-10|0_4182851	chr1H	4182851	1	0	1	.	.	0
3271943a1	silicoDArT	3271943	1H	39.9333	71	NA|HvDArTseq-3271943a1|Freq-10|3858_0	NA	0	0	0	1	.	.	0
3263822a1	silicoDArT	3263822	1H	39.9333	72	NA|HvDArTseq-3263822a1|Freq-10|10565_0	NA	0	0	0	1	.	.	0
3258422a1	SNP	3258422	1H	39.9333	73	chr1H|HvDArTseq-3258422a1|Freq-10|0_4129500	chr1H	4129500	1	1	0	.	.	0
3987523a1	SNP	3987523	1H	39.9333	74	NA|HvDArTseq-3987523a1|Freq-10|2067_0	NA	0	0	1	0	.	.	37
13142578a1	silicoDArT	13142578	1H	39.9333	75	chr1H|HvDArTseq-13142578a1|Freq-10|0_23484458	chr1H	23484458	1	1	0	.	.	0
3262934a1	silicoDArT	3262934	1H	39.9333	76	NA|HvDArTseq-3262934a1|Freq-10|7682_0	NA	0	0	1	0	.	.	0
3433024a1	silicoDArT	3433024	1H	39.9333	77	NA|HvDArTseq-3433024a1|Freq-10|5853_0	NA	0	0	1	0	.	.	0
3433403a1	silicoDArT	3433403	1H	39.9333	78	NA|HvDArTseq-3433403a1|Freq-10|8930_0	NA	0	0	1	0	.	.	0
3433269a1	silicoDArT	3433269	1H	39.9333	79	NA|HvDArTseq-3433269a1|Freq-10|4890_0	NA	0	0	1	0	.	.	0
3927459a1	silicoDArT	3927459	1H	39.9333	80	chr1H|HvDArTseq-3927459a1|Freq-10|0_3305474	chr1H	3305474	1	1	0	.	.	0
3987220a1	silicoDArT	3987220	1H	39.9333	81	NA|HvDArTseq-3987220a1|Freq-10|407_0	NA	0	0	1	0	.	.	0
3266766a1	silicoDArT	3266766	1H	39.9333	82	chr2H|HvDArTseq-3266766a1|Freq-10|0_713128809	chr2H	713128809	1	0	1	.	.	0
3273524a1	silicoDArT	3273524	1H	39.9333	83	chr1H|HvDArTseq-3273524a1|Freq-10|0_2669166	chr1H	2669166	1	0	1	.	.	0
3913498a1	silicoDArT	3913498	1H	39.9333	84	NA|HvDArTseq-3913498a1|Freq-10|5995_0	NA	0	0	0	1	.	.	0
5251012a1	silicoDArT	5251012	1H	39.9333	85	NA|HvDArTseq-5251012a1|Freq-10|3748_0	NA	0	0	0	1	.	.	0
3986124a1	silicoDArT	3986124	1H	39.9333	86	chr1H|HvDArTseq-3986124a1|Freq-10|0_2739198	chr1H	2739198	1	0	1	.	.	0
5258345a1	SNP	5258345	1H	39.9333	87	chr1H|HvDArTseq-5258345a1|Freq-10|0_4183131	chr1H	4183131	1	1	0	distorted	.	0
3255449a1	silicoDArT	3255449	1H	40.8129	88	chr1H|HvDArTseq-3255449a1|Freq-10|0_4770554	chr1H	4770554	1	1	0	.	.	0
4172909a1	silicoDArT	4172909	1H	42.3625	89	chr1H|HvDArTseq-4172909a1|Freq-10|0_3255566	chr1H	3255566	1	0	1	.	.	0
3266756a1	silicoDArT	3266756	1H	44.0365	90	chr1H|HvDArTseq-3266756a1|Freq-10|0_6560014	chr1H	6560014	1	1	0	.	.	0
5251294a1	silicoDArT	5251294	1H	45.2231	91	NA|HvDArTseq-5251294a1|Freq-10|1347_0	NA	0	0	1	0	.	.	0
3985325a2	SNP	3985325	1H	45.2231	92	NA|HvDArTseq-3985325a2|Freq-10|7961_0	NA	0	0	0	1	.	.	0
3985325a1	silicoDArT	3985325	1H	45.2231	93	NA|HvDArTseq-3985325a1|Freq-10|6050_0	NA	0	0	1	0	.	.	0
4007896a1	silicoDArT	4007896	1H	45.2231	94	chr1H|HvDArTseq-4007896a1|Freq-10|0_3649705	chr1H	3649705	1	1	0	.	.	0
13142593a1	silicoDArT	13142593	1H	45.2231	95	NA|HvDArTseq-13142593a1|Freq-10|9758_0	NA	0	0	-	0	.	A allele inferred (non-parental).	0
5248260a1	silicoDArT	5248260	1H	45.7852	96	NA|HvDArTseq-5248260a1|Freq-10|8866_0	NA	0	0	1	0	.	.	0
5253712a1	silicoDArT	5253712	1H	45.7852	97	NA|HvDArTseq-5253712a1|Freq-10|5651_0	NA	0	0	1	0	.	.	0
3923665a1	silicoDArT	3923665	1H	47.51	98	chr1H|HvDArTseq-3923665a1|Freq-10|0_5018065	chr1H	5018065	1	1	-	distorted	B allele inferred (non-parental).	0
3985954a1	silicoDArT	3985954	1H	49.2404	99	NA|HvDArTseq-3985954a1|Freq-10|3966_0	NA	0	0	0	1	.	.	0
6436587a1	silicoDArT	6436587	1H	49.2404	100	NA|HvDArTseq-6436587a1|Freq-10|226_0	NA	0	0	1	0	.	.	0
3263192a1	silicoDArT	3263192	1H	49.2404	101	NA|HvDArTseq-3263192a1|Freq-10|9683_0	NA	0	0	1	0	.	.	0
4016076a1	silicoDArT	4016076	1H	49.2404	102	chr1H|HvDArTseq-4016076a1|Freq-10|0_3811557	chr1H	3811557	1	1	0	.	.	0
5247549a1	silicoDArT	5247549	1H	49.2404	103	NA|HvDArTseq-5247549a1|Freq-10|3925_0	NA	0	0	1	0	.	.	0
6437589a1	silicoDArT	6437589	1H	49.2404	104	NA|HvDArTseq-6437589a1|Freq-10|435_0	NA	0	0	1	0	.	.	0
3270251a2	SNP	3270251	1H	50.084	105	chr1H|HvDArTseq-3270251a2|Freq-10|0_5940721	chr1H	5940721	1	1	0	.	.	0
3430382a1	silicoDArT	3430382	1H	50.084	106	chr1H|HvDArTseq-3430382a1|Freq-10|0_5149180	chr1H	5149180	1	0	1	.	.	0
3987344a1	silicoDArT	3987344	1H	50.084	107	NA|HvDArTseq-3987344a1|Freq-10|427_0	NA	0	0	0	-	.	B allele inferred (non-parental).	0
4783341a1	silicoDArT	4783341	1H	50.084	108	NA|HvDArTseq-4783341a1|Freq-10|3463_0	NA	0	0	0	1	.	.	0
3666336a1	SNP	3666336	1H	50.084	109	chr1H|HvDArTseq-3666336a1|Freq-10|0_6247543	chr1H	6247543	1	1	0	.	.	0
3258376a1	silicoDArT	3258376	1H	50.084	110	MM|HvDArTseq-3258376a1|Freq-10|123_0	MM	0	>2	0	-	.	B allele inferred (non-parental).	0
3267596a1	silicoDArT	3267596	1H	50.084	111	NA|HvDArTseq-3267596a1|Freq-10|8856_0	NA	0	0	0	1	.	.	0
3431597a1	silicoDArT	3431597	1H	50.084	112	NA|HvDArTseq-3431597a1|Freq-10|749_0	NA	0	0	1	0	.	.	0
11116212a2	SNP	11116212	1H	50.084	113	NA|HvDArTseq-11116212a2|Freq-10|9424_0	NA	0	0	0	1	distorted	.	1
3985463a1	silicoDArT	3985463	1H	50.084	114	NA|HvDArTseq-3985463a1|Freq-10|1200_0	NA	0	0	0	1	.	.	0
3270251a1	silicoDArT	3270251	1H	50.084	115	chr1H|HvDArTseq-3270251a1|Freq-10|0_5940721	chr1H	5940721	1	0	1	.	.	0
3396682a1	silicoDArT	3396682	1H	50.9335	116	NA|HvDArTseq-3396682a1|Freq-10|3445_0	NA	0	0	0	1	.	.	0
6255981a1	silicoDArT	6255981	1H	51.7806	117	NA|HvDArTseq-6255981a1|Freq-10|6966_0	NA	0	0	0	1	.	.	0
3985203a1	silicoDArT	3985203	1H	53.8041	118	NA|HvDArTseq-3985203a1|Freq-10|4332_0	NA	0	0	0	1	.	.	0
3269015a1	silicoDArT	3269015	1H	55.218	119	chr1H|HvDArTseq-3269015a1|Freq-10|0_3494735	chr1H	3494735	1	1	0	.	.	0
6437481a1	silicoDArT	6437481	1H	58.7956	120	NA|HvDArTseq-6437481a1|Freq-10|7113_0	NA	0	0	1	0	.	.	0
3256503a1	silicoDArT	3256503	1H	65.1634	121	chr1H|HvDArTseq-3256503a1|Freq-10|0_7072341	chr1H	7072341	2	1	0	distorted	.	0
3985548a1	silicoDArT	3985548	1H	68.0794	122	chr1H|HvDArTseq-3985548a1|Freq-10|0_8776500	chr1H	8776500	1	0	1	.	.	0
6284134a2	SNP	6284134	1H	68.6802	123	chrUn|HvDArTseq-6284134a2|Freq-10|0_195942686	chrUn	195942686	1	2	0	.	.	14
3257126a1	silicoDArT	3257126	1H	68.6802	124	chr1H|HvDArTseq-3257126a1|Freq-10|0_8776500	chr1H	8776500	1	0	1	.	.	0
6435674a1	silicoDArT	6435674	1H	68.6802	125	chrUn|HvDArTseq-6435674a1|Freq-10|0_50451065	chrUn	50451065	1	1	0	.	.	0
3396549a1	silicoDArT	3396549	1H	68.6802	126	chr2H|HvDArTseq-3396549a1|Freq-10|0_232740882	chr2H	232740882	1	0	1	.	.	0
3260133a1	silicoDArT	3260133	1H	68.6802	127	chr1H|HvDArTseq-3260133a1|Freq-10|0_8761056	chr1H	8761056	1	1	0	.	.	0
5239459a1	silicoDArT	5239459	1H	68.6802	128	NA|HvDArTseq-5239459a1|Freq-10|953_0	NA	0	0	0	1	.	.	0
5239922a1	silicoDArT	5239922	1H	68.6802	129	NA|HvDArTseq-5239922a1|Freq-10|3387_0	NA	0	0	0	1	.	.	0
3267725a1	silicoDArT	3267725	1H	68.6802	130	NA|HvDArTseq-3267725a1|Freq-10|2110_0	NA	0	0	0	1	.	.	0
3259989a1	silicoDArT	3259989	1H	68.6802	131	chr1H|HvDArTseq-3259989a1|Freq-10|0_8491465	chr1H	8491465	1	1	0	.	.	0
3985451a1	silicoDArT	3985451	1H	69.8169	132	NA|HvDArTseq-3985451a1|Freq-10|3845_0	NA	0	0	0	-	.	B allele inferred (non-parental).	0
5253821a1	silicoDArT	5253821	1H	70.9725	133	NA|HvDArTseq-5253821a1|Freq-10|10085_0	NA	0	0	0	1	.	.	0
3917089a1	silicoDArT	3917089	1H	73.3508	134	chr1H|HvDArTseq-3917089a1|Freq-10|0_8986195	chr1H	8986195	1	0	1	.	.	0
5250294a1	silicoDArT	5250294	1H	76.9624	135	NA|HvDArTseq-5250294a1|Freq-10|1037_0	NA	0	0	0	1	.	.	0
5240041a1	silicoDArT	5240041	1H	81.0646	136	chr1H|HvDArTseq-5240041a1|Freq-10|0_9255546	chr1H	9255546	1	0	1	.	.	0
3985236a1	silicoDArT	3985236	1H	82.3433	137	NA|HvDArTseq-3985236a1|Freq-10|9147_0	NA	0	0	0	1	.	.	0
5242284a1	silicoDArT	5242284	1H	82.3433	138	NA|HvDArTseq-5242284a1|Freq-10|2581_0	NA	0	0	0	1	.	.	12
3985245a1	silicoDArT	3985245	1H	82.3433	139	chr1H|HvDArTseq-3985245a1|Freq-10|0_9616170	chr1H	9616170	1	0	1	.	.	0
3259613a1	silicoDArT	3259613	1H	82.3433	140	chr1H|HvDArTseq-3259613a1|Freq-10|0_9255546	chr1H	9255546	1	1	0	.	.	0
3271033a1	silicoDArT	3271033	1H	82.3433	141	chr1H|HvDArTseq-3271033a1|Freq-10|0_8619588	chr1H	8619588	1	1	0	.	.	0
3270100a1	SNP	3270100	1H	82.3433	142	chr1H|HvDArTseq-3270100a1|Freq-10|0_9605609	chr1H	9605609	1	1	0	.	.	0
3430718a1	silicoDArT	3430718	1H	82.3433	143	NA|HvDArTseq-3430718a1|Freq-10|3282_0	NA	0	0	-	0	.	A allele inferred (non-parental).	0
6437473a1	silicoDArT	6437473	1H	82.3433	144	NA|HvDArTseq-6437473a1|Freq-10|6512_0	NA	0	0	1	0	.	.	0
3429708a1	silicoDArT	3429708	1H	82.3433	145	NA|HvDArTseq-3429708a1|Freq-10|661_0	NA	0	0	1	0	.	.	0
6437092a1	silicoDArT	6437092	1H	83.044	146	chr3H|HvDArTseq-6437092a1|Freq-10|0_690381858	chr3H	690381858	1	1	0	.	.	0
4171106a1	silicoDArT	4171106	1H	83.044	147	chr1H|HvDArTseq-4171106a1|Freq-10|0_9795807	chr1H	9795807	1	-	0	.	A allele inferred (non-parental).	0
5249476a1	silicoDArT	5249476	1H	83.044	148	NA|HvDArTseq-5249476a1|Freq-10|675_0	NA	0	0	1	0	.	.	0
3396441a1	silicoDArT	3396441	1H	83.044	149	NA|HvDArTseq-3396441a1|Freq-10|8004_0	NA	0	0	1	0	.	.	0
4007605a2	SNP	4007605	1H	83.7304	150	NA|HvDArTseq-4007605a2|Freq-10|1958_0	NA	0	0	0	1	.	.	0
4007605a1	silicoDArT	4007605	1H	83.7304	151	NA|HvDArTseq-4007605a1|Freq-10|6405_0	NA	0	0	1	0	.	.	0
3914558a1	silicoDArT	3914558	1H	83.7304	152	chr1H|HvDArTseq-3914558a1|Freq-10|0_9948699	chr1H	9948699	2	1	0	.	.	0
3398844a3	SNP	3398844	1H	83.7304	153	chr1H|HvDArTseq-3398844a3|Freq-10|0_10141096	chr1H	10141096	1	1	0	.	.	23
3811588a1	silicoDArT	3811588	1H	83.7304	154	NA|HvDArTseq-3811588a1|Freq-10|10080_0	NA	0	0	0	1	.	.	0
13142581a1	silicoDArT	13142581	1H	85.2109	155	chr1H|HvDArTseq-13142581a1|Freq-10|0_9939539	chr1H	9939539	1	1	0	.	.	0
4190511a1	silicoDArT	4190511	1H	87.8326	156	chr1H|HvDArTseq-4190511a1|Freq-10|0_9948699	chr1H	9948699	2	0	-	.	B allele inferred (non-parental).	0
5250577a1	silicoDArT	5250577	1H	90.1599	157	NA|HvDArTseq-5250577a1|Freq-10|3407_0	NA	0	0	0	1	.	.	0
3811484a1	silicoDArT	3811484	1H	91.8391	158	NA|HvDArTseq-3811484a1|Freq-10|4143_0	NA	0	0	0	1	.	.	0
3985347a1	silicoDArT	3985347	1H	94.2132	159	NA|HvDArTseq-3985347a1|Freq-10|2464_0	NA	0	0	1	0	.	.	0
3259888a1	silicoDArT	3259888	1H	96.0591	160	MM|HvDArTseq-3259888a1|Freq-10|237_0	MM	0	>2	0	1	.	.	0
3257294a1	silicoDArT	3257294	1H	98.2946	161	chr1H|HvDArTseq-3257294a1|Freq-10|0_10962372	chr1H	10962372	1	1	0	.	.	0
3917527a1	SNP	3917527	1H	100.019	162	chr7H|HvDArTseq-3917527a1|Freq-10|0_623134751	chr7H	623134751	1	2	0	.	.	13
3261547a1	SNP	3261547	1H	100.019	163	chr7H|HvDArTseq-3261547a1|Freq-10|0_2540538	chr7H	2540538	1	-	1	.	A allele inferred (non-parental).	0
3272120a1	silicoDArT	3272120	1H	100.605	164	chr1H|HvDArTseq-3272120a1|Freq-10|0_10965683	chr1H	10965683	1	-	0	.	A allele inferred (non-parental).	0
3665247a1	silicoDArT	3665247	1H	102.331	165	chr1H|HvDArTseq-3665247a1|Freq-10|0_11165415	chr1H	11165415	1	1	0	.	.	0
7175149a1	silicoDArT	7175149	1H	104.059	166	chr1H|HvDArTseq-7175149a1|Freq-10|0_11473029	chr1H	11473029	1	0	1	.	.	0
5251328a1	silicoDArT	5251328	1H	105.768	167	chr1H|HvDArTseq-5251328a1|Freq-10|0_11165415	chr1H	11165415	1	0	1	.	.	0
9769847a1	silicoDArT	9769847	1H	105.768	168	NA|HvDArTseq-9769847a1|Freq-10|8099_0	NA	0	0	0	1	.	.	0
9769852a1	silicoDArT	9769852	1H	105.768	169	NA|HvDArTseq-9769852a1|Freq-10|3962_0	NA	0	0	0	1	.	.	0
3396027a1	silicoDArT	3396027	1H	106.386	170	NA|HvDArTseq-3396027a1|Freq-10|4894_0	NA	0	0	1	0	.	.	0
3809847a1	silicoDArT	3809847	1H	106.386	171	NA|HvDArTseq-3809847a1|Freq-10|3705_0	NA	0	0	0	1	.	.	0
4791219a1	silicoDArT	4791219	1H	106.386	172	NA|HvDArTseq-4791219a1|Freq-10|4716_0	NA	0	0	1	0	.	.	0
3273134a1	SNP	3273134	1H	106.386	173	chr1H|HvDArTseq-3273134a1|Freq-10|0_11510539	chr1H	11510539	1	1	0	.	.	0
3274647a1	silicoDArT	3274647	1H	106.386	174	NA|HvDArTseq-3274647a1|Freq-10|901_0	NA	0	0	0	1	.	.	0
9771445a1	silicoDArT	9771445	1H	106.386	175	chr1H|HvDArTseq-9771445a1|Freq-10|0_11520486	chr1H	11520486	1	0	1	.	.	0
3809847a2	SNP	3809847	1H	106.386	176	NA|HvDArTseq-3809847a2|Freq-10|566_0	NA	0	0	1	0	.	.	5
3262753a1	silicoDArT	3262753	1H	106.386	177	chr1H|HvDArTseq-3262753a1|Freq-10|0_11520486	chr1H	11520486	1	1	0	.	.	0
3269568a1	silicoDArT	3269568	1H	108.116	178	chr1H|HvDArTseq-3269568a1|Freq-10|0_11528557	chr1H	11528557	1	0	1	.	.	0
4789755a1	SNP	4789755	1H	108.73	179	NA|HvDArTseq-4789755a1|Freq-10|5331_0	NA	0	0	1	0	.	.	1
3274603a1	silicoDArT	3274603	1H	113.019	180	NA|HvDArTseq-3274603a1|Freq-10|3799_0	NA	0	0	0	1	.	.	0
7933922a1	silicoDArT	7933922	1H	116.702	181	NA|HvDArTseq-7933922a1|Freq-10|4411_0	NA	0	0	0	1	.	.	0
3270760a1	silicoDArT	3270760	1H	116.702	182	chr2H|HvDArTseq-3270760a1|Freq-10|0_679065898	chr2H	679065898	1	1	0	.	.	0
3270281a1	silicoDArT	3270281	1H	118.43	183	NA|HvDArTseq-3270281a1|Freq-10|6926_0	NA	0	0	-	1	.	A allele inferred (non-parental).	0
5251518a1	silicoDArT	5251518	1H	118.43	184	chr1H|HvDArTseq-5251518a1|Freq-10|0_12027898	chr1H	12027898	1	1	0	.	.	0
3433294a1	silicoDArT	3433294	1H	118.43	185	NA|HvDArTseq-3433294a1|Freq-10|8757_0	NA	0	0	0	1	.	.	0
3932745a1	silicoDArT	3932745	1H	119.583	186	NA|HvDArTseq-3932745a1|Freq-10|10495_0	NA	0	0	1	0	.	.	0
4791053a1	silicoDArT	4791053	1H	119.583	187	NA|HvDArTseq-4791053a1|Freq-10|5154_0	NA	0	0	1	0	.	.	0
3263955a1	SNP	3263955	1H	119.583	188	NA|HvDArTseq-3263955a1|Freq-10|5310_0	NA	0	0	1	0	.	.	15
3275310a1	silicoDArT	3275310	1H	119.583	189	NA|HvDArTseq-3275310a1|Freq-10|1865_0	NA	0	0	0	1	.	.	0
4193211a1	silicoDArT	4193211	1H	119.583	190	NA|HvDArTseq-4193211a1|Freq-10|7557_0	NA	0	0	0	1	.	.	0
5253289a1	silicoDArT	5253289	1H	119.583	191	NA|HvDArTseq-5253289a1|Freq-10|7723_0	NA	0	0	1	0	.	.	0
5257050a1	silicoDArT	5257050	1H	119.583	192	NA|HvDArTseq-5257050a1|Freq-10|7991_0	NA	0	0	1	0	.	.	0
4793318a1	silicoDArT	4793318	1H	119.583	193	NA|HvDArTseq-4793318a1|Freq-10|1398_0	NA	0	0	1	0	.	.	0
3255768a1	SNP	3255768	1H	119.583	194	chr1H|HvDArTseq-3255768a1|Freq-10|0_12034778	chr1H	12034778	1	1	0	.	.	0
3397030a1	silicoDArT	3397030	1H	119.583	195	NA|HvDArTseq-3397030a1|Freq-10|9226_0	NA	0	0	0	1	.	.	0
3999830a1	silicoDArT	3999830	1H	119.583	196	NA|HvDArTseq-3999830a1|Freq-10|8180_0	NA	0	0	-	0	.	A allele inferred (non-parental).	0
6436973a1	silicoDArT	6436973	1H	119.583	197	NA|HvDArTseq-6436973a1|Freq-10|4612_0	NA	0	0	1	0	.	.	0
3263227a1	silicoDArT	3263227	1H	119.583	198	chr5H|HvDArTseq-3263227a1|Freq-10|0_550829849	chr5H	550829849	1	0	1	.	.	0
6428589a1	silicoDArT	6428589	1H	119.583	199	chr1H|HvDArTseq-6428589a1|Freq-10|0_12572582	chr1H	12572582	1	1	0	.	.	0
3269067a1	silicoDArT	3269067	1H	119.583	200	chr1H|HvDArTseq-3269067a1|Freq-10|0_11981528	chr1H	11981528	1	0	1	.	.	0
6436499a1	silicoDArT	6436499	1H	119.583	201	NA|HvDArTseq-6436499a1|Freq-10|3530_0	NA	0	0	0	1	.	.	0
3430884a1	silicoDArT	3430884	1H	119.583	202	chr1H|HvDArTseq-3430884a1|Freq-10|0_11981593	chr1H	11981593	1	0	1	.	.	0
3256412a1	silicoDArT	3256412	1H	119.583	203	chr1H|HvDArTseq-3256412a1|Freq-10|0_12556736	chr1H	12556736	1	0	1	.	.	0
3275568a1	silicoDArT	3275568	1H	119.583	204	chr1H|HvDArTseq-3275568a1|Freq-10|0_13395155	chr1H	13395155	1	0	1	.	.	0
3265900a1	silicoDArT	3265900	1H	119.583	205	chrUn|HvDArTseq-3265900a1|Freq-10|0_512242	chrUn	512242	1	-	0	.	A allele inferred (non-parental).	0
3926181a1	silicoDArT	3926181	1H	119.583	206	NA|HvDArTseq-3926181a1|Freq-10|7196_0	NA	0	0	1	0	.	.	0
3267406a1	silicoDArT	3267406	1H	121.696	207	chr1H|HvDArTseq-3267406a1|Freq-10|0_13243808	chr1H	13243808	1	1	0	distorted	.	0
3256299a1	silicoDArT	3256299	1H	125.918	208	NA|HvDArTseq-3256299a1|Freq-10|2902_0	NA	0	0	0	1	.	.	0
3267452a1	silicoDArT	3267452	1H	125.918	209	chr1H|HvDArTseq-3267452a1|Freq-10|0_13845462	chr1H	13845462	2	0	1	.	.	0
4415193a1	silicoDArT	4415193	1H	128.904	210	NA|HvDArTseq-4415193a1|Freq-10|1_0	NA	0	0	0	1	.	.	0
6437369a1	silicoDArT	6437369	1H	129.573	211	chr1H|HvDArTseq-6437369a1|Freq-10|0_14192794	chr1H	14192794	1	1	0	.	.	0
3264207a1	silicoDArT	3264207	1H	130.353	212	chr1H|HvDArTseq-3264207a1|Freq-10|0_14308301	chr1H	14308301	1	0	1	.	.	0
3269124a1	silicoDArT	3269124	1H	130.353	213	chr1H|HvDArTseq-3269124a1|Freq-10|0_14308236	chr1H	14308236	1	0	1	.	.	0
3432901a1	silicoDArT	3432901	1H	131.558	214	chr1H|HvDArTseq-3432901a1|Freq-10|0_14348634	chr1H	14348634	1	0	1	.	.	0
3812617a1	silicoDArT	3812617	1H	133.254	215	NA|HvDArTseq-3812617a1|Freq-10|4419_0	NA	0	0	0	1	.	.	0
4012822a1	silicoDArT	4012822	1H	134.391	216	chr1H|HvDArTseq-4012822a1|Freq-10|0_15593939	chr1H	15593939	1	0	1	.	.	0
3273737a1	silicoDArT	3273737	1H	134.391	217	NA|HvDArTseq-3273737a1|Freq-10|1287_0	NA	0	0	0	1	.	.	0
4594852a1	silicoDArT	4594852	1H	134.391	218	NA|HvDArTseq-4594852a1|Freq-10|976_0	NA	0	0	0	1	.	.	1
3911063a1	silicoDArT	3911063	1H	134.391	219	MM|HvDArTseq-3911063a1|Freq-10|160_0	MM	0	>2	0	1	.	.	0
3276908a1	silicoDArT	3276908	1H	134.391	220	NA|HvDArTseq-3276908a1|Freq-10|3928_0	NA	0	0	0	1	.	.	0
4790475a1	silicoDArT	4790475	1H	134.997	221	NA|HvDArTseq-4790475a1|Freq-10|10537_0	NA	0	0	0	1	.	.	0
3260365a1	silicoDArT	3260365	1H	134.997	222	chr1H|HvDArTseq-3260365a1|Freq-10|0_17200984	chr1H	17200984	1	0	1	.	.	0
3985730a1	silicoDArT	3985730	1H	136.236	223	chr1H|HvDArTseq-3985730a1|Freq-10|0_15593874	chr1H	15593874	1	0	1	.	.	0
6284134a1	SNP	6284134	1H	137.268	224	chrUn|HvDArTseq-6284134a1|Freq-10|0_195942686	chrUn	195942686	1	2	0	.	.	33
3263344a1	SNP	3263344	1H	137.268	225	NA|HvDArTseq-3263344a1|Freq-10|10507_0	NA	0	0	2	1	.	.	0
4000127a1	silicoDArT	4000127	1H	137.83	226	NA|HvDArTseq-4000127a1|Freq-10|4906_0	NA	0	0	1	0	.	.	0
5249644a1	SNP	5249644	1H	139.334	227	chr1H|HvDArTseq-5249644a1|Freq-10|0_17877630	chr1H	17877630	1	-	1	.	A allele inferred (non-parental).	0
3260462a1	silicoDArT	3260462	1H	140.32	228	NA|HvDArTseq-3260462a1|Freq-10|337_0	NA	0	0	1	0	.	.	0
3256511a1	silicoDArT	3256511	1H	140.32	229	chr1H|HvDArTseq-3256511a1|Freq-10|0_18358691	chr1H	18358691	1	1	0	distorted	.	0
5259865a1	silicoDArT	5259865	1H	140.32	230	chr1H|HvDArTseq-5259865a1|Freq-10|0_18079886	chr1H	18079886	1	1	0	.	.	0
3987243a2	SNP	3987243	1H	142.07	231	chr1H|HvDArTseq-3987243a2|Freq-10|0_18332683	chr1H	18332683	1	1	0	.	.	0
3987243a1	silicoDArT	3987243	1H	142.07	232	chr1H|HvDArTseq-3987243a1|Freq-10|0_18332683	chr1H	18332683	1	0	1	.	.	0
3261945a1	SNP	3261945	1H	144.917	233	chr1H|HvDArTseq-3261945a1|Freq-10|0_19402019	chr1H	19402019	1	1	0	.	.	0
3273429a1	silicoDArT	3273429	1H	144.917	234	chr1H|HvDArTseq-3273429a1|Freq-10|0_18920048	chr1H	18920048	1	1	0	.	.	0
3272129a1	SNP	3272129	1H	144.917	235	NA|HvDArTseq-3272129a1|Freq-10|8273_0	NA	0	0	1	0	.	.	0
3256110a1	silicoDArT	3256110	1H	144.917	236	chr1H|HvDArTseq-3256110a1|Freq-10|0_18920048	chr1H	18920048	1	0	1	.	.	0
3267517a2	SNP	3267517	1H	145.479	237	chr1H|HvDArTseq-3267517a2|Freq-10|0_19349220	chr1H	19349220	1	1	0	.	.	5
3276594a1	silicoDArT	3276594	1H	146.088	238	NA|HvDArTseq-3276594a1|Freq-10|4098_0	NA	0	0	0	1	.	.	0
3259986a1	SNP	3259986	1H	146.088	239	chr1H|HvDArTseq-3259986a1|Freq-10|0_20345840	chr1H	20345840	1	1	0	.	.	7
3432534a1	silicoDArT	3432534	1H	155.467	240	chr1H|HvDArTseq-3432534a1|Freq-10|0_21609954	chr1H	21609954	1	1	0	distorted	.	0
3987230a1	silicoDArT	3987230	1H	166.373	241	NA|HvDArTseq-3987230a1|Freq-10|3520_0	NA	0	0	0	1	.	.	0
5254200a1	silicoDArT	5254200	1H	167.51	242	NA|HvDArTseq-5254200a1|Freq-10|4464_0	NA	0	0	0	1	.	.	0
3256745a1	silicoDArT	3256745	1H	168.073	243	chr1H|HvDArTseq-3256745a1|Freq-10|0_20693795	chr1H	20693795	1	1	0	.	.	0
3987273a1	silicoDArT	3987273	1H	168.073	244	chr1H|HvDArTseq-3987273a1|Freq-10|0_20560518	chr1H	20560518	1	0	1	.	.	0
3268243a1	silicoDArT	3268243	1H	169.211	245	chr1H|HvDArTseq-3268243a1|Freq-10|0_21432894	chr1H	21432894	1	1	0	.	.	0
3268634a1	silicoDArT	3268634	1H	169.773	246	chr1H|HvDArTseq-3268634a1|Freq-10|0_20684754	chr1H	20684754	1	1	0	.	.	0
3256305a1	silicoDArT	3256305	1H	169.773	247	chr1H|HvDArTseq-3256305a1|Freq-10|0_20684689	chr1H	20684689	1	1	0	.	.	0
3258865a1	silicoDArT	3258865	1H	169.773	248	chr1H|HvDArTseq-3258865a1|Freq-10|0_22142674	chr1H	22142674	1	1	0	.	.	0
3914820a1	silicoDArT	3914820	1H	169.773	249	chr1H|HvDArTseq-3914820a1|Freq-10|0_21748090	chr1H	21748090	1	1	0	.	.	0
3987460a1	silicoDArT	3987460	1H	169.773	250	NA|HvDArTseq-3987460a1|Freq-10|3080_0	NA	0	0	0	1	.	.	0
3266885a2	SNP	3266885	1H	169.773	251	NA|HvDArTseq-3266885a2|Freq-10|6931_0	NA	0	0	0	1	.	.	0
4594123a1	silicoDArT	4594123	1H	169.773	252	NA|HvDArTseq-4594123a1|Freq-10|122_0	NA	0	0	-	0	.	A allele inferred (non-parental).	0
3987205a1	silicoDArT	3987205	1H	169.773	253	NA|HvDArTseq-3987205a1|Freq-10|1179_0	NA	0	0	0	1	.	.	0
3932452a1	silicoDArT	3932452	1H	169.773	254	NA|HvDArTseq-3932452a1|Freq-10|8415_0	NA	0	0	0	1	.	.	0
3913582a1	silicoDArT	3913582	1H	169.773	255	NA|HvDArTseq-3913582a1|Freq-10|4346_0	NA	0	0	0	1	.	.	0
3987339a1	silicoDArT	3987339	1H	169.773	256	NA|HvDArTseq-3987339a1|Freq-10|506_0	NA	0	0	1	0	.	.	0
13142380a1	silicoDArT	13142380	1H	170.91	257	NA|HvDArTseq-13142380a1|Freq-10|4431_0	NA	0	0	0	1	.	.	0
3926779a1	silicoDArT	3926779	1H	172.635	258	NA|HvDArTseq-3926779a1|Freq-10|6313_0	NA	0	0	0	1	.	.	0
5257751a1	silicoDArT	5257751	1H	172.635	259	NA|HvDArTseq-5257751a1|Freq-10|6756_0	NA	0	0	0	1	.	.	0
5250590a1	silicoDArT	5250590	1H	173.815	260	NA|HvDArTseq-5250590a1|Freq-10|5751_0	NA	0	0	-	0	.	A allele inferred (non-parental).	0
4016101a1	silicoDArT	4016101	1H	176.712	261	chr1H|HvDArTseq-4016101a1|Freq-10|0_22163089	chr1H	22163089	1	1	0	.	.	0
3259609a2	SNP	3259609	1H	178.437	262	chr1H|HvDArTseq-3259609a2|Freq-10|0_23050014	chr1H	23050014	1	1	0	.	.	10
3255589a1	silicoDArT	3255589	1H	178.437	263	NA|HvDArTseq-3255589a1|Freq-10|5714_0	NA	0	0	1	0	.	.	0
3434266a2	SNP	3434266	1H	178.999	264	chr1H|HvDArTseq-3434266a2|Freq-10|0_24655108	chr1H	24655108	1	1	0	.	.	16
3258063a1	silicoDArT	3258063	1H	179.561	265	NA|HvDArTseq-3258063a1|Freq-10|4662_0	NA	0	0	0	1	.	.	0
6435399a1	silicoDArT	6435399	1H	180.713	266	NA|HvDArTseq-6435399a1|Freq-10|5986_0	NA	0	0	1	0	.	.	0
3271293a1	silicoDArT	3271293	1H	181.951	267	NA|HvDArTseq-3271293a1|Freq-10|3625_0	NA	0	0	1	0	.	.	0
3264574a1	silicoDArT	3264574	1H	181.951	268	NA|HvDArTseq-3264574a1|Freq-10|4486_0	NA	0	0	0	1	.	.	9
4196226a1	silicoDArT	4196226	1H	181.951	269	chr1H|HvDArTseq-4196226a1|Freq-10|0_28709606	chr1H	28709606	1	1	0	.	.	4
4196478a1	silicoDArT	4196478	1H	181.951	270	chr1H|HvDArTseq-4196478a1|Freq-10|0_30792543	chr1H	30792543	1	0	1	.	.	1
3661697a1	silicoDArT	3661697	1H	181.951	271	NA|HvDArTseq-3661697a1|Freq-10|7214_0	NA	0	0	0	-	.	B allele inferred (non-parental).	0
3270411a1	silicoDArT	3270411	1H	181.951	272	chr1H|HvDArTseq-3270411a1|Freq-10|0_30792152	chr1H	30792152	1	0	1	.	.	0
4185625a1	silicoDArT	4185625	1H	181.951	273	NA|HvDArTseq-4185625a1|Freq-10|10324_0	NA	0	0	0	1	.	.	0
3265368a1	silicoDArT	3265368	1H	181.951	274	chr1H|HvDArTseq-3265368a1|Freq-10|0_27635291	chr1H	27635291	1	0	1	.	.	0
4185103a1	silicoDArT	4185103	1H	181.951	275	NA|HvDArTseq-4185103a1|Freq-10|9064_0	NA	0	0	0	1	.	.	0
3434292a1	silicoDArT	3434292	1H	181.951	276	NA|HvDArTseq-3434292a1|Freq-10|10458_0	NA	0	0	0	1	.	.	0
3931339a1	silicoDArT	3931339	1H	181.951	277	chr1H|HvDArTseq-3931339a1|Freq-10|0_28528308	chr1H	28528308	2	1	0	.	.	0
4790472a1	silicoDArT	4790472	1H	181.951	278	NA|HvDArTseq-4790472a1|Freq-10|6161_0	NA	0	0	0	1	.	.	0
3262345a1	SNP	3262345	1H	182.598	279	chr1H|HvDArTseq-3262345a1|Freq-10|0_31027750	chr1H	31027750	1	1	0	.	.	0
6435561a1	silicoDArT	6435561	1H	183.744	280	NA|HvDArTseq-6435561a1|Freq-10|6417_0	NA	0	0	1	0	.	.	0
5258501a1	silicoDArT	5258501	1H	183.744	281	chr1H|HvDArTseq-5258501a1|Freq-10|0_31661378	chr1H	31661378	1	0	1	.	.	0
3268745a1	silicoDArT	3268745	1H	183.744	282	NA|HvDArTseq-3268745a1|Freq-10|3345_0	NA	0	0	0	1	.	.	0
4189945a1	silicoDArT	4189945	1H	183.744	283	chr1H|HvDArTseq-4189945a1|Freq-10|0_31675235	chr1H	31675235	1	0	1	.	.	0
4013504a1	silicoDArT	4013504	1H	184.459	284	NA|HvDArTseq-4013504a1|Freq-10|7042_0	NA	0	0	1	0	.	.	0
6280840a1	silicoDArT	6280840	1H	184.459	285	NA|HvDArTseq-6280840a1|Freq-10|2324_0	NA	0	0	1	0	.	.	0
3276099a1	silicoDArT	3276099	1H	185.15	286	NA|HvDArTseq-3276099a1|Freq-10|3335_0	NA	0	0	0	1	.	.	0
4790683a1	silicoDArT	4790683	1H	185.15	287	NA|HvDArTseq-4790683a1|Freq-10|10151_0	NA	0	0	0	1	.	.	0
5249639a1	SNP	5249639	1H	186.409	288	NA|HvDArTseq-5249639a1|Freq-10|2407_0	NA	0	0	0	1	.	.	3
5250199a1	silicoDArT	5250199	1H	187.037	289	NA|HvDArTseq-5250199a1|Freq-10|316_0	NA	0	0	1	0	.	.	0
5250585a1	silicoDArT	5250585	1H	191.461	290	NA|HvDArTseq-5250585a1|Freq-10|2415_0	NA	0	0	0	1	.	.	0
3917056a1	silicoDArT	3917056	1H	196.603	291	chr1H|HvDArTseq-3917056a1|Freq-10|0_48271451	chr1H	48271451	1	1	0	.	.	0
4415307a1	silicoDArT	4415307	1H	199.006	292	chr1H|HvDArTseq-4415307a1|Freq-10|0_39019448	chr1H	39019448	1	1	0	.	.	0
3665369a1	SNP	3665369	1H	200.743	293	chr1H|HvDArTseq-3665369a1|Freq-10|0_41084428	chr1H	41084428	1	1	0	distorted	.	0
4781610a1	silicoDArT	4781610	1H	200.743	294	NA|HvDArTseq-4781610a1|Freq-10|3682_0	NA	0	0	0	1	.	.	0
3663981a1	silicoDArT	3663981	1H	200.743	295	chr1H|HvDArTseq-3663981a1|Freq-10|0_41223488	chr1H	41223488	1	0	1	.	.	0
8664107a1	silicoDArT	8664107	1H	200.743	296	NA|HvDArTseq-8664107a1|Freq-10|4172_0	NA	0	0	-	0	.	A allele inferred (non-parental).	0
3256493a1	silicoDArT	3256493	1H	200.743	297	chr1H|HvDArTseq-3256493a1|Freq-10|0_48952699	chr1H	48952699	1	0	1	.	.	0
3396037a1	silicoDArT	3396037	1H	200.743	298	chr1H|HvDArTseq-3396037a1|Freq-10|0_43537632	chr1H	43537632	1	0	1	.	.	0
6435702a1	silicoDArT	6435702	1H	200.743	299	NA|HvDArTseq-6435702a1|Freq-10|4298_0	NA	0	0	1	0	.	.	0
4187375a1	silicoDArT	4187375	1H	200.743	300	NA|HvDArTseq-4187375a1|Freq-10|33_0	NA	0	0	0	1	.	.	0
3268362a1	silicoDArT	3268362	1H	200.743	301	NA|HvDArTseq-3268362a1|Freq-10|7642_0	NA	0	0	0	1	.	.	0
3266505a1	silicoDArT	3266505	1H	200.743	302	NA|HvDArTseq-3266505a1|Freq-10|7297_0	NA	0	0	0	1	.	.	0
3255784a1	silicoDArT	3255784	1H	202.072	303	chr1H|HvDArTseq-3255784a1|Freq-10|0_45723506	chr1H	45723506	1	0	1	.	.	0
3912850a1	silicoDArT	3912850	1H	204.399	304	NA|HvDArTseq-3912850a1|Freq-10|1146_0	NA	0	0	1	0	.	.	0
3912285a1	SNP	3912285	1H	205.351	305	NA|HvDArTseq-3912285a1|Freq-10|145_0	NA	0	0	1	0	.	.	20
5250916a1	silicoDArT	5250916	1H	205.351	306	NA|HvDArTseq-5250916a1|Freq-10|7548_0	NA	0	0	1	0	.	.	0
3267398a2	SNP	3267398	1H	205.351	307	chr1H|HvDArTseq-3267398a2|Freq-10|0_59729825	chr1H	59729825	2	0	1	.	.	0
5250651a1	silicoDArT	5250651	1H	205.351	308	chr5H|HvDArTseq-5250651a1|Freq-10|0_603851477	chr5H	603851477	1	0	1	.	.	0
3925320a1	silicoDArT	3925320	1H	205.351	309	NA|HvDArTseq-3925320a1|Freq-10|6549_0	NA	0	0	0	1	.	.	0
4790088a1	silicoDArT	4790088	1H	205.351	310	NA|HvDArTseq-4790088a1|Freq-10|6056_0	NA	0	0	0	1	.	.	0
4015759a1	silicoDArT	4015759	1H	206.113	311	chr1H|HvDArTseq-4015759a1|Freq-10|0_71984118	chr1H	71984118	1	1	0	.	.	0
3930136a1	silicoDArT	3930136	1H	207.384	312	NA|HvDArTseq-3930136a1|Freq-10|6245_0	NA	0	0	1	0	.	.	0
4011834a1	silicoDArT	4011834	1H	210.493	313	NA|HvDArTseq-4011834a1|Freq-10|8722_0	NA	0	0	1	0	.	.	0
3274789a1	silicoDArT	3274789	1H	213.689	314	NA|HvDArTseq-3274789a1|Freq-10|2320_0	NA	0	0	1	0	.	.	0
6437090a1	SNP	6437090	1H	213.689	315	chr1H|HvDArTseq-6437090a1|Freq-10|0_354799680	chr1H	354799680	1	0	1	.	.	3
3263675a1	silicoDArT	3263675	1H	213.689	316	NA|HvDArTseq-3263675a1|Freq-10|7465_0	NA	0	0	1	0	.	.	3
5245903a1	silicoDArT	5245903	1H	213.689	317	chr1H|HvDArTseq-5245903a1|Freq-10|0_356358131	chr1H	356358131	1	1	0	.	.	0
3273656a2	SNP	3273656	1H	213.689	318	chr1H|HvDArTseq-3273656a2|Freq-10|0_352058063	chr1H	352058063	1	1	0	.	.	0
3265826a1	silicoDArT	3265826	1H	213.689	319	NA|HvDArTseq-3265826a1|Freq-10|6728_0	NA	0	0	0	1	.	.	0
3257013a1	SNP	3257013	1H	214.649	320	chr1H|HvDArTseq-3257013a1|Freq-10|0_330111005	chr1H	330111005	1	0	1	.	.	0
3927959a1	silicoDArT	3927959	1H	214.649	321	NA|HvDArTseq-3927959a1|Freq-10|2040_0	NA	0	0	1	0	.	.	13
4198520a1	silicoDArT	4198520	1H	214.649	322	NA|HvDArTseq-4198520a1|Freq-10|4517_0	NA	0	0	0	1	.	.	0
3910892a1	silicoDArT	3910892	1H	214.649	323	NA|HvDArTseq-3910892a1|Freq-10|48_0	NA	0	0	0	1	.	.	0
4790226a1	silicoDArT	4790226	1H	214.649	324	NA|HvDArTseq-4790226a1|Freq-10|8639_0	NA	0	0	0	1	.	.	0
7583448a2	SNP	7583448	1H	214.649	325	NA|HvDArTseq-7583448a2|Freq-10|9426_0	NA	0	0	1	0	.	.	0
5249643a1	SNP	5249643	1H	214.649	326	NA|HvDArTseq-5249643a1|Freq-10|10467_0	NA	0	0	1	0	.	.	0
3433554a1	silicoDArT	3433554	1H	214.649	327	chr1H|HvDArTseq-3433554a1|Freq-10|0_330111070	chr1H	330111070	1	0	1	.	.	0
4197691a1	silicoDArT	4197691	1H	214.649	328	NA|HvDArTseq-4197691a1|Freq-10|2993_0	NA	0	0	1	0	.	.	0
4190730a1	silicoDArT	4190730	1H	214.649	329	chr3H|HvDArTseq-4190730a1|Freq-10|0_526165365	chr3H	526165365	2	0	1	.	.	1
4198077a1	silicoDArT	4198077	1H	214.649	330	chr1H|HvDArTseq-4198077a1|Freq-10|0_340882694	chr1H	340882694	1	0	-	.	B allele inferred (non-parental).	0
4185136a1	silicoDArT	4185136	1H	214.649	331	NA|HvDArTseq-4185136a1|Freq-10|6867_0	NA	0	0	0	1	.	.	2
4012209a1	silicoDArT	4012209	1H	214.649	332	NA|HvDArTseq-4012209a1|Freq-10|3249_0	NA	0	0	1	0	.	.	0
3256390a1	silicoDArT	3256390	1H	214.649	333	chr1H|HvDArTseq-3256390a1|Freq-10|0_341307737	chr1H	341307737	1	0	1	.	.	0
3270549a1	silicoDArT	3270549	1H	214.649	334	chr1H|HvDArTseq-3270549a1|Freq-10|0_337378669	chr1H	337378669	1	1	0	.	.	0
6437082a1	silicoDArT	6437082	1H	214.649	335	chr1H|HvDArTseq-6437082a1|Freq-10|0_330111070	chr1H	330111070	1	1	0	.	.	0
6435423a1	silicoDArT	6435423	1H	214.649	336	NA|HvDArTseq-6435423a1|Freq-10|6249_0	NA	0	0	1	0	.	.	0
3263842a1	silicoDArT	3263842	1H	214.649	337	chr1H|HvDArTseq-3263842a1|Freq-10|0_342693867	chr1H	342693867	1	1	0	.	.	0
4192781a1	silicoDArT	4192781	1H	214.649	338	NA|HvDArTseq-4192781a1|Freq-10|5951_0	NA	0	0	1	0	.	.	0
6435444a1	silicoDArT	6435444	1H	215.561	339	NA|HvDArTseq-6435444a1|Freq-10|8786_0	NA	0	0	1	0	.	.	0
3433008a1	silicoDArT	3433008	1H	216.739	340	NA|HvDArTseq-3433008a1|Freq-10|9183_0	NA	0	0	1	0	.	.	0
7188564a1	silicoDArT	7188564	1H	217.892	341	NA|HvDArTseq-7188564a1|Freq-10|3241_0	NA	0	0	1	0	.	.	0
3661783a1	silicoDArT	3661783	1H	219.052	342	chr1H|HvDArTseq-3661783a1|Freq-10|0_23222439	chr1H	23222439	1	1	0	.	.	0
3272625a1	silicoDArT	3272625	1H	219.052	343	chr1H|HvDArTseq-3272625a1|Freq-10|0_86133670	chr1H	86133670	1	1	0	.	.	0
4790647a1	silicoDArT	4790647	1H	219.052	344	chr1H|HvDArTseq-4790647a1|Freq-10|0_229688568	chr1H	229688568	1	1	0	.	.	5
3274233a1	silicoDArT	3274233	1H	219.052	345	chr1H|HvDArTseq-3274233a1|Freq-10|0_229658908	chr1H	229658908	1	0	1	.	.	0
3915334a1	silicoDArT	3915334	1H	219.052	346	NA|HvDArTseq-3915334a1|Freq-10|9538_0	NA	0	0	0	1	.	.	0
6436230a1	silicoDArT	6436230	1H	219.052	347	NA|HvDArTseq-6436230a1|Freq-10|1325_0	NA	0	0	1	0	.	.	0
6436782a1	silicoDArT	6436782	1H	219.052	348	NA|HvDArTseq-6436782a1|Freq-10|1608_0	NA	0	0	1	0	.	.	0
3265245a1	silicoDArT	3265245	1H	219.052	349	NA|HvDArTseq-3265245a1|Freq-10|6185_0	NA	0	0	1	0	.	.	0
3266522a1	silicoDArT	3266522	1H	219.052	350	chr1H|HvDArTseq-3266522a1|Freq-10|0_106490345	chr1H	106490345	1	1	0	.	.	0
4190880a1	silicoDArT	4190880	1H	219.052	351	NA|HvDArTseq-4190880a1|Freq-10|5465_0	NA	0	0	1	0	.	.	0
5251083a1	silicoDArT	5251083	1H	219.052	352	chr1H|HvDArTseq-5251083a1|Freq-10|0_90642816	chr1H	90642816	1	1	0	.	.	0
6273192a1	silicoDArT	6273192	1H	219.052	353	NA|HvDArTseq-6273192a1|Freq-10|7709_0	NA	0	0	1	0	.	.	0
5251706a1	silicoDArT	5251706	1H	219.052	354	chr1H|HvDArTseq-5251706a1|Freq-10|0_90642751	chr1H	90642751	1	1	0	.	.	0
3433338a1	silicoDArT	3433338	1H	219.052	355	NA|HvDArTseq-3433338a1|Freq-10|2066_0	NA	0	0	1	0	.	.	0
7931586a1	silicoDArT	7931586	1H	221.4	356	NA|HvDArTseq-7931586a1|Freq-10|2255_0	NA	0	0	1	0	.	.	0
3255994a1	silicoDArT	3255994	1H	225.752	357	chr1H|HvDArTseq-3255994a1|Freq-10|0_316711773	chr1H	316711773	1	0	1	.	.	0
3430508a1	silicoDArT	3430508	1H	227.089	358	chr1H|HvDArTseq-3430508a1|Freq-10|0_259071772	chr1H	259071772	1	0	1	.	.	0
3914594a1	silicoDArT	3914594	1H	227.089	359	NA|HvDArTseq-3914594a1|Freq-10|4498_0	NA	0	0	0	1	.	.	0
3263241a1	silicoDArT	3263241	1H	227.089	360	chr1H|HvDArTseq-3263241a1|Freq-10|0_347390931	chr1H	347390931	1	0	1	.	.	0
4193012a1	silicoDArT	4193012	1H	227.089	361	NA|HvDArTseq-4193012a1|Freq-10|1369_0	NA	0	0	0	1	.	.	0
4186572a1	silicoDArT	4186572	1H	227.089	362	NA|HvDArTseq-4186572a1|Freq-10|495_0	NA	0	0	0	1	.	.	0
4016369a1	silicoDArT	4016369	1H	227.089	363	chr1H|HvDArTseq-4016369a1|Freq-10|0_92658543	chr1H	92658543	2	0	1	.	.	0
3263752a1	silicoDArT	3263752	1H	227.089	364	NA|HvDArTseq-3263752a1|Freq-10|503_0	NA	0	0	0	1	.	.	0
3985540a1	silicoDArT	3985540	1H	227.089	365	chr1H|HvDArTseq-3985540a1|Freq-10|0_108391765	chr1H	108391765	1	0	1	.	.	0
3397798a1	silicoDArT	3397798	1H	227.089	366	chr1H|HvDArTseq-3397798a1|Freq-10|0_81289256	chr1H	81289256	1	0	1	.	.	0
3269351a1	silicoDArT	3269351	1H	227.089	367	NA|HvDArTseq-3269351a1|Freq-10|151_0	NA	0	0	0	1	.	.	0
3266926a1	silicoDArT	3266926	1H	228.682	368	NA|HvDArTseq-3266926a1|Freq-10|8980_0	NA	0	0	0	1	.	.	0
3397611a1	silicoDArT	3397611	1H	232.936	369	NA|HvDArTseq-3397611a1|Freq-10|5994_0	NA	0	0	0	1	.	.	0
3273141a1	silicoDArT	3273141	1H	237.801	370	chr1H|HvDArTseq-3273141a1|Freq-10|0_321075256	chr1H	321075256	1	0	1	.	.	0
3911995a1	silicoDArT	3911995	1H	238.949	371	NA|HvDArTseq-3911995a1|Freq-10|1429_0	NA	0	0	0	1	.	.	0
3986737a1	silicoDArT	3986737	1H	241.062	372	NA|HvDArTseq-3986737a1|Freq-10|3031_0	NA	0	0	0	1	.	.	0
5256509a1	silicoDArT	5256509	1H	242.464	373	chr1H|HvDArTseq-5256509a1|Freq-10|0_74341676	chr1H	74341676	1	0	1	.	.	0
3397944a1	silicoDArT	3397944	1H	244.389	374	chr1H|HvDArTseq-3397944a1|Freq-10|0_331872652	chr1H	331872652	1	0	1	.	.	0
5338773a1	silicoDArT	5338773	1H	245.536	375	NA|HvDArTseq-5338773a1|Freq-10|8104_0	NA	0	0	0	1	.	.	0
3432815a1	silicoDArT	3432815	1H	246.721	376	NA|HvDArTseq-3432815a1|Freq-10|1309_0	NA	0	0	0	1	.	.	0
3433498a1	silicoDArT	3433498	1H	247.938	377	chr1H|HvDArTseq-3433498a1|Freq-10|0_358113259	chr1H	358113259	1	0	1	.	.	0
3264542a1	silicoDArT	3264542	1H	247.938	378	chr1H|HvDArTseq-3264542a1|Freq-10|0_349629695	chr1H	349629695	1	0	1	.	.	0
3273656a1	silicoDArT	3273656	1H	249.841	379	chr1H|HvDArTseq-3273656a1|Freq-10|0_352058063	chr1H	352058063	1	0	1	.	.	0
4196127a1	silicoDArT	4196127	1H	252.195	380	chr1H|HvDArTseq-4196127a1|Freq-10|0_361649057	chr1H	361649057	1	0	1	.	.	0
3260170a1	SNP	3260170	1H	253.36	381	NA|HvDArTseq-3260170a1|Freq-10|6158_0	NA	0	0	1	0	.	.	0
3262999a1	SNP	3262999	1H	253.36	382	chr1H|HvDArTseq-3262999a1|Freq-10|0_361650813	chr1H	361650813	1	0	1	.	.	6
3274980a1	silicoDArT	3274980	1H	253.36	383	NA|HvDArTseq-3274980a1|Freq-10|1330_0	NA	0	0	0	1	.	.	0
6429360a1	silicoDArT	6429360	1H	253.36	384	chr1H|HvDArTseq-6429360a1|Freq-10|0_361649057	chr1H	361649057	1	1	0	.	.	0
6436406a1	silicoDArT	6436406	1H	254.561	385	chr1H|HvDArTseq-6436406a1|Freq-10|0_375286227	chr1H	375286227	1	1	0	.	.	0
4192478a1	silicoDArT	4192478	1H	254.561	386	chr1H|HvDArTseq-4192478a1|Freq-10|0_364373315	chr1H	364373315	2	1	0	.	.	0
3255519a1	SNP	3255519	1H	254.561	387	chr1H|HvDArTseq-3255519a1|Freq-10|0_362986974	chr1H	362986974	1	0	1	.	.	0
13142336a1	silicoDArT	13142336	1H	254.561	388	chr1H|HvDArTseq-13142336a1|Freq-10|0_372997825	chr1H	372997825	1	1	0	.	.	0
3273544a1	silicoDArT	3273544	1H	254.561	389	chr1H|HvDArTseq-3273544a1|Freq-10|0_365713785	chr1H	365713785	1	-	0	.	A allele inferred (non-parental).	0
3927977a1	silicoDArT	3927977	1H	254.561	390	NA|HvDArTseq-3927977a1|Freq-10|8300_0	NA	0	0	1	0	.	.	0
7242676a1	SNP	7242676	1H	256.254	391	NA|HvDArTseq-7242676a1|Freq-10|1265_0	NA	0	0	0	2	.	.	23
4195412a1	silicoDArT	4195412	1H	257.979	392	chr1H|HvDArTseq-4195412a1|Freq-10|0_364127787	chr1H	364127787	1	0	1	.	.	0
3274380a2	SNP	3274380	1H	259.587	393	chr1H|HvDArTseq-3274380a2|Freq-10|0_379467491	chr1H	379467491	1	0	1	.	.	2
5250690a1	silicoDArT	5250690	1H	259.587	394	chr1H|HvDArTseq-5250690a1|Freq-10|0_379467491	chr1H	379467491	1	0	1	.	.	0
3270133a1	silicoDArT	3270133	1H	259.587	395	chr1H|HvDArTseq-3270133a1|Freq-10|0_379467556	chr1H	379467556	1	1	0	.	.	0
3812574a1	silicoDArT	3812574	1H	259.587	396	chr1H|HvDArTseq-3812574a1|Freq-10|0_386189589	chr1H	386189589	1	0	1	.	.	0
3265393a1	silicoDArT	3265393	1H	259.587	397	chr1H|HvDArTseq-3265393a1|Freq-10|0_391567103	chr1H	391567103	1	0	1	.	.	0
3663991a1	silicoDArT	3663991	1H	260.683	398	NA|HvDArTseq-3663991a1|Freq-10|7233_0	NA	0	0	0	1	.	.	0
3664356a1	silicoDArT	3664356	1H	260.683	399	NA|HvDArTseq-3664356a1|Freq-10|10353_0	NA	0	0	0	1	.	.	12
6437104a1	silicoDArT	6437104	1H	260.683	400	chr1H|HvDArTseq-6437104a1|Freq-10|0_379792566	chr1H	379792566	1	0	1	.	.	0
5254869a1	silicoDArT	5254869	1H	260.683	401	chr1H|HvDArTseq-5254869a1|Freq-10|0_380634529	chr1H	380634529	1	1	0	.	.	0
3923842a1	silicoDArT	3923842	1H	260.683	402	chr1H|HvDArTseq-3923842a1|Freq-10|0_380634529	chr1H	380634529	1	0	1	.	.	0
3916431a1	silicoDArT	3916431	1H	261.804	403	chr1H|HvDArTseq-3916431a1|Freq-10|0_391561960	chr1H	391561960	1	1	0	.	.	0
11400575a1	silicoDArT	11400575	1H	263.655	404	chr1H|HvDArTseq-11400575a1|Freq-10|0_383904090	chr1H	383904090	1	0	1	.	.	0
8642860a1	SNP	8642860	1H	265.381	405	NA|HvDArTseq-8642860a1|Freq-10|8919_0	NA	0	0	2	1	.	.	18
5249766a1	SNP	5249766	1H	266.084	406	NA|HvDArTseq-5249766a1|Freq-10|8443_0	NA	0	0	0	1	.	.	0
3255949a1	SNP	3255949	1H	266.084	407	chr1H|HvDArTseq-3255949a1|Freq-10|0_397865101	chr1H	397865101	1	0	1	.	.	1
3267853a1	silicoDArT	3267853	1H	266.084	408	chr1H|HvDArTseq-3267853a1|Freq-10|0_403284120	chr1H	403284120	1	1	0	.	.	0
3269652a1	silicoDArT	3269652	1H	266.084	409	chr3H|HvDArTseq-3269652a1|Freq-10|0_426570837	chr3H	426570837	1	1	0	.	.	0
3266151a1	silicoDArT	3266151	1H	266.084	410	NA|HvDArTseq-3266151a1|Freq-10|8255_0	NA	0	0	1	0	.	.	0
3665804a1	silicoDArT	3665804	1H	266.084	411	chr1H|HvDArTseq-3665804a1|Freq-10|0_389336297	chr1H	389336297	1	0	1	.	.	0
5251361a1	silicoDArT	5251361	1H	267.142	412	NA|HvDArTseq-5251361a1|Freq-10|244_0	NA	0	0	1	0	.	.	0
3915614a1	SNP	3915614	1H	267.704	413	chr2H|HvDArTseq-3915614a1|Freq-10|0_43660674	chr2H	43660674	1	2	0	.	.	27
11290865a1	silicoDArT	11290865	1H	268.266	414	NA|HvDArTseq-11290865a1|Freq-10|6529_0	NA	0	0	1	0	.	.	0
6435844a1	silicoDArT	6435844	1H	270.417	415	chr1H|HvDArTseq-6435844a1|Freq-10|0_426928582	chr1H	426928582	1	1	0	.	.	0
8660877a1	silicoDArT	8660877	1H	273.63	416	chr1H|HvDArTseq-8660877a1|Freq-10|0_425806322	chr1H	425806322	1	1	0	.	.	0
9766903a1	silicoDArT	9766903	1H	274.923	417	chr1H|HvDArTseq-9766903a1|Freq-10|0_424147027	chr1H	424147027	1	0	1	.	.	0
3430654a1	silicoDArT	3430654	1H	274.923	418	chr1H|HvDArTseq-3430654a1|Freq-10|0_419010060	chr1H	419010060	1	1	0	.	.	0
3272110a1	silicoDArT	3272110	1H	274.923	419	NA|HvDArTseq-3272110a1|Freq-10|5205_0	NA	0	0	1	0	.	.	1
3272728a1	silicoDArT	3272728	1H	275.701	420	NA|HvDArTseq-3272728a1|Freq-10|4970_0	NA	0	0	0	1	.	.	0
3662932a1	silicoDArT	3662932	1H	275.701	421	NA|HvDArTseq-3662932a1|Freq-10|2222_0	NA	0	0	0	1	.	.	0
5337504a1	silicoDArT	5337504	1H	277.13	422	NA|HvDArTseq-5337504a1|Freq-10|9816_0	NA	0	0	0	1	.	.	0
5251047a1	silicoDArT	5251047	1H	281.341	423	NA|HvDArTseq-5251047a1|Freq-10|5919_0	NA	0	0	0	1	.	.	0
4188088a1	silicoDArT	4188088	1H	283.861	424	chr1H|HvDArTseq-4188088a1|Freq-10|0_427393784	chr1H	427393784	1	0	1	.	.	0
5250018a1	silicoDArT	5250018	1H	284.43	425	NA|HvDArTseq-5250018a1|Freq-10|3505_0	NA	0	0	0	1	.	.	39
3259728a1	SNP	3259728	1H	284.992	426	chr1H|HvDArTseq-3259728a1|Freq-10|0_427393849	chr1H	427393849	1	0	1	.	.	0
6272963a1	SNP	6272963	1H	285.915	427	NA|HvDArTseq-6272963a1|Freq-10|3597_0	NA	0	0	1	0	.	.	3
3255999a1	SNP	3255999	1H	286.748	428	chr1H|HvDArTseq-3255999a1|Freq-10|0_431244413	chr1H	431244413	1	0	1	.	.	0
5257008a1	SNP	5257008	1H	286.748	429	NA|HvDArTseq-5257008a1|Freq-10|3595_0	NA	0	0	0	2	.	.	7
3987431a1	silicoDArT	3987431	1H	286.748	430	NA|HvDArTseq-3987431a1|Freq-10|366_0	NA	0	0	0	1	.	.	0
5334354a1	silicoDArT	5334354	1H	286.748	431	chr1H|HvDArTseq-5334354a1|Freq-10|0_443418816	chr1H	443418816	1	1	0	.	.	0
3264666a1	silicoDArT	3264666	1H	287.585	432	NA|HvDArTseq-3264666a1|Freq-10|2094_0	NA	0	0	1	0	.	.	0
3262930a1	silicoDArT	3262930	1H	287.585	433	chr1H|HvDArTseq-3262930a1|Freq-10|0_444075737	chr1H	444075737	1	1	0	.	.	0
3662522a1	silicoDArT	3662522	1H	288.426	434	chr1H|HvDArTseq-3662522a1|Freq-10|0_447746794	chr1H	447746794	1	1	0	.	.	0
3433128a1	silicoDArT	3433128	1H	288.426	435	NA|HvDArTseq-3433128a1|Freq-10|8831_0	NA	0	0	1	0	.	.	0
4793410a1	silicoDArT	4793410	1H	289.271	436	NA|HvDArTseq-4793410a1|Freq-10|9895_0	NA	0	0	1	0	.	.	0
4174699a1	SNP	4174699	1H	289.271	437	chr1H|HvDArTseq-4174699a1|Freq-10|0_451299178	chr1H	451299178	1	1	0	.	.	3
4791724a1	silicoDArT	4791724	1H	290.115	438	NA|HvDArTseq-4791724a1|Freq-10|5155_0	NA	0	0	1	0	.	.	0
3266420a1	silicoDArT	3266420	1H	295.39	439	chr1H|HvDArTseq-3266420a1|Freq-10|0_440803703	chr1H	440803703	1	1	0	.	.	0
3264380a1	silicoDArT	3264380	1H	303.046	440	NA|HvDArTseq-3264380a1|Freq-10|2474_0	NA	0	0	1	0	.	.	0
3260037a1	SNP	3260037	1H	305.62	441	NA|HvDArTseq-3260037a1|Freq-10|7691_0	NA	0	0	1	0	.	.	2
3265003a1	silicoDArT	3265003	1H	305.62	442	NA|HvDArTseq-3265003a1|Freq-10|4637_0	NA	0	0	0	1	.	.	0
5251503a1	silicoDArT	5251503	1H	306.59	443	NA|HvDArTseq-5251503a1|Freq-10|3643_0	NA	0	0	1	0	.	.	0
3926805a1	silicoDArT	3926805	1H	306.59	444	NA|HvDArTseq-3926805a1|Freq-10|6611_0	NA	0	0	1	0	.	.	0
5240896a2	SNP	5240896	1H	306.59	445	NA|HvDArTseq-5240896a2|Freq-10|4144_0	NA	0	0	1	0	.	.	8
3986748a1	silicoDArT	3986748	1H	306.59	446	NA|HvDArTseq-3986748a1|Freq-10|10089_0	NA	0	0	1	0	.	.	0
3262581a1	SNP	3262581	1H	306.59	447	chr1H|HvDArTseq-3262581a1|Freq-10|0_461399648	chr1H	461399648	1	0	1	.	.	0
3266937a1	silicoDArT	3266937	1H	306.59	448	NA|HvDArTseq-3266937a1|Freq-10|656_0	NA	0	0	1	0	.	.	0
6435679a1	silicoDArT	6435679	1H	310.88	449	NA|HvDArTseq-6435679a1|Freq-10|7185_0	NA	0	0	1	0	.	.	0
3664957a1	silicoDArT	3664957	1H	314.547	450	NA|HvDArTseq-3664957a1|Freq-10|1932_0	NA	0	0	0	1	.	.	0
3910542a1	silicoDArT	3910542	1H	314.547	451	chr1H|HvDArTseq-3910542a1|Freq-10|0_459905926	chr1H	459905926	1	0	1	.	.	0
3923058a1	SNP	3923058	1H	314.547	452	NA|HvDArTseq-3923058a1|Freq-10|6567_0	NA	0	0	1	0	.	.	0
4006536a1	silicoDArT	4006536	1H	314.547	453	NA|HvDArTseq-4006536a1|Freq-10|1495_0	NA	0	0	0	1	.	.	0
3664683a1	silicoDArT	3664683	1H	317.493	454	chr1H|HvDArTseq-3664683a1|Freq-10|0_462997348	chr1H	462997348	1	0	1	.	.	0
3258459a1	SNP	3258459	1H	320.579	455	chr1H|HvDArTseq-3258459a1|Freq-10|0_463111172	chr1H	463111172	1	0	1	.	.	2
5249685a1	SNP	5249685	1H	320.579	456	chr1H|HvDArTseq-5249685a1|Freq-10|0_462929585	chr1H	462929585	1	0	1	.	.	0
3260189a1	SNP	3260189	1H	321.716	457	NA|HvDArTseq-3260189a1|Freq-10|2240_0	NA	0	0	0	1	.	.	1
7752412a1	silicoDArT	7752412	1H	322.866	458	NA|HvDArTseq-7752412a1|Freq-10|8523_0	NA	0	0	0	1	.	.	0
3255700a1	SNP	3255700	1H	324.43	459	chr1H|HvDArTseq-3255700a1|Freq-10|0_467284900	chr1H	467284900	1	1	0	.	.	5
4007174a1	silicoDArT	4007174	1H	324.43	460	chr1H|HvDArTseq-4007174a1|Freq-10|0_467285479	chr1H	467285479	1	0	1	.	.	0
6436490a1	silicoDArT	6436490	1H	326.141	461	chr1H|HvDArTseq-6436490a1|Freq-10|0_467285479	chr1H	467285479	1	1	0	.	.	0
3267974a1	silicoDArT	3267974	1H	328.715	462	NA|HvDArTseq-3267974a1|Freq-10|8920_0	NA	0	0	1	0	.	.	0
3254973a1	SNP	3254973	1H	330.308	463	NA|HvDArTseq-3254973a1|Freq-10|6075_0	NA	0	0	0	1	.	.	0
6280236a1	silicoDArT	6280236	1H	331.062	464	chr1H|HvDArTseq-6280236a1|Freq-10|0_469073345	chr1H	469073345	1	1	0	.	.	2
3270342a1	silicoDArT	3270342	1H	331.062	465	NA|HvDArTseq-3270342a1|Freq-10|8634_0	NA	0	0	0	1	.	.	0
4174843a1	silicoDArT	4174843	1H	331.062	466	chr1H|HvDArTseq-4174843a1|Freq-10|0_469073345	chr1H	469073345	1	0	1	.	.	0
3270301a1	silicoDArT	3270301	1H	331.062	467	NA|HvDArTseq-3270301a1|Freq-10|3681_0	NA	0	0	0	1	.	.	0
4173745a1	silicoDArT	4173745	1H	332.211	468	chr1H|HvDArTseq-4173745a1|Freq-10|0_470389589	chr1H	470389589	2	0	-	distorted	B allele inferred (non-parental). Had to FP.	0
3260719a1	SNP	3260719	1H	333.058	469	chr1H|HvDArTseq-3260719a1|Freq-10|0_471792219	chr1H	471792219	1	0	1	.	.	1
3931397a2	SNP	3931397	1H	333.058	470	chr1H|HvDArTseq-3931397a2|Freq-10|0_470308319	chr1H	470308319	1	1	0	.	.	1
6437180a1	SNP	6437180	1H	333.058	471	chr1H|HvDArTseq-6437180a1|Freq-10|0_470254144	chr1H	470254144	1	0	1	.	.	0
3263193a1	silicoDArT	3263193	1H	333.058	472	MM|HvDArTseq-3263193a1|Freq-10|117_0	MM	0	>2	1	0	.	.	8
3915094a1	silicoDArT	3915094	1H	333.058	473	chr1H|HvDArTseq-3915094a1|Freq-10|0_470255716	chr1H	470255716	1	0	1	.	.	0
3916206a1	silicoDArT	3916206	1H	333.058	474	chr1H|HvDArTseq-3916206a1|Freq-10|0_470308384	chr1H	470308384	1	0	1	.	.	0
8600225a1	silicoDArT	8600225	1H	333.058	475	NA|HvDArTseq-8600225a1|Freq-10|5200_0	NA	0	0	1	0	.	.	0
3268814a1	silicoDArT	3268814	1H	333.058	476	NA|HvDArTseq-3268814a1|Freq-10|5877_0	NA	0	0	0	1	.	.	0
3931397a1	silicoDArT	3931397	1H	333.058	477	chr1H|HvDArTseq-3931397a1|Freq-10|0_470308319	chr1H	470308319	1	0	1	.	.	0
4169721a1	silicoDArT	4169721	1H	333.058	478	chr1H|HvDArTseq-4169721a1|Freq-10|0_471621916	chr1H	471621916	1	0	1	.	.	0
4170979a1	silicoDArT	4170979	1H	333.058	479	chr1H|HvDArTseq-4170979a1|Freq-10|0_469542333	chr1H	469542333	1	0	1	.	.	0
6436720a1	silicoDArT	6436720	1H	333.058	480	chr1H|HvDArTseq-6436720a1|Freq-10|0_473099842	chr1H	473099842	1	1	0	.	.	0
3396787a1	silicoDArT	3396787	1H	333.058	481	NA|HvDArTseq-3396787a1|Freq-10|2106_0	NA	0	0	0	-	.	B allele inferred (non-parental).	0
4185168a1	silicoDArT	4185168	1H	333.058	482	NA|HvDArTseq-4185168a1|Freq-10|3983_0	NA	0	0	0	1	.	.	0
3397513a1	silicoDArT	3397513	1H	333.058	483	NA|HvDArTseq-3397513a1|Freq-10|10006_0	NA	0	0	0	1	.	.	0
4187800a1	silicoDArT	4187800	1H	333.058	484	chr1H|HvDArTseq-4187800a1|Freq-10|0_472953899	chr1H	472953899	1	0	1	.	.	0
3397768a1	silicoDArT	3397768	1H	333.058	485	NA|HvDArTseq-3397768a1|Freq-10|1088_0	NA	0	0	0	1	.	.	0
3396181a1	silicoDArT	3396181	1H	333.058	486	NA|HvDArTseq-3396181a1|Freq-10|9827_0	NA	0	0	0	1	.	.	0
3271307a1	silicoDArT	3271307	1H	334.043	487	NA|HvDArTseq-3271307a1|Freq-10|393_0	NA	0	0	0	1	.	.	0
3265268a1	silicoDArT	3265268	1H	336.386	488	chr1H|HvDArTseq-3265268a1|Freq-10|0_471596516	chr1H	471596516	1	1	0	.	.	0
3914335a1	silicoDArT	3914335	1H	338.278	489	NA|HvDArTseq-3914335a1|Freq-10|4232_0	NA	0	0	0	1	.	.	1
4186412a1	silicoDArT	4186412	1H	341.048	490	NA|HvDArTseq-4186412a1|Freq-10|1149_0	NA	0	0	1	0	.	.	0
3262883a1	SNP	3262883	1H	344.209	491	chr1H|HvDArTseq-3262883a1|Freq-10|0_475055970	chr1H	475055970	1	0	1	.	.	1
5255477a1	SNP	5255477	1H	344.209	492	chr1H|HvDArTseq-5255477a1|Freq-10|0_474437482	chr1H	474437482	1	1	0	.	.	9
3264977a1	silicoDArT	3264977	1H	344.209	493	NA|HvDArTseq-3264977a1|Freq-10|1514_0	NA	0	0	0	1	.	.	0
3260193a1	silicoDArT	3260193	1H	344.209	494	NA|HvDArTseq-3260193a1|Freq-10|1371_0	NA	0	0	0	1	.	.	0
3263831a1	silicoDArT	3263831	1H	344.209	495	chr1H|HvDArTseq-3263831a1|Freq-10|0_475057242	chr1H	475057242	1	0	1	.	.	0
5253851a1	silicoDArT	5253851	1H	344.209	496	NA|HvDArTseq-5253851a1|Freq-10|6129_0	NA	0	0	1	0	.	.	0
3396067a1	silicoDArT	3396067	1H	345.147	497	chr1H|HvDArTseq-3396067a1|Freq-10|0_477275402	chr1H	477275402	1	1	0	.	.	0
13142347a1	silicoDArT	13142347	1H	346.139	498	NA|HvDArTseq-13142347a1|Freq-10|10176_0	NA	0	0	1	0	.	.	0
3925841a1	SNP	3925841	1H	346.844	499	chrUn|HvDArTseq-3925841a1|Freq-10|0_117946978	chrUn	117946978	1	0	2	.	.	19
5335817a1	silicoDArT	5335817	1H	346.844	500	chr1H|HvDArTseq-5335817a1|Freq-10|0_476753822	chr1H	476753822	1	1	0	.	.	0
6435377a1	silicoDArT	6435377	1H	346.844	501	chr1H|HvDArTseq-6435377a1|Freq-10|0_476753950	chr1H	476753950	1	1	0	.	.	0
5254518a1	silicoDArT	5254518	1H	346.844	502	NA|HvDArTseq-5254518a1|Freq-10|7788_0	NA	0	0	1	0	.	.	0
5247119a1	silicoDArT	5247119	1H	347.742	503	chr1H|HvDArTseq-5247119a1|Freq-10|0_478458902	chr1H	478458902	1	0	1	.	.	0
4330924a1	silicoDArT	4330924	1H	347.742	504	NA|HvDArTseq-4330924a1|Freq-10|9029_0	NA	0	0	0	1	.	.	0
3433265a1	silicoDArT	3433265	1H	348.753	505	chr1H|HvDArTseq-3433265a1|Freq-10|0_478955060	chr1H	478955060	1	0	1	.	.	0
3263606a1	silicoDArT	3263606	1H	350.994	506	NA|HvDArTseq-3263606a1|Freq-10|3510_0	NA	0	0	1	0	.	.	0
3261781a1	SNP	3261781	1H	350.994	507	chr1H|HvDArTseq-3261781a1|Freq-10|0_480051114	chr1H	480051114	1	0	1	.	.	1
3273676a1	silicoDArT	3273676	1H	350.994	508	chr1H|HvDArTseq-3273676a1|Freq-10|0_479981122	chr1H	479981122	1	1	0	.	.	0
4790004a1	silicoDArT	4790004	1H	353.791	509	NA|HvDArTseq-4790004a1|Freq-10|9927_0	NA	0	0	1	0	.	.	0
3912798a1	silicoDArT	3912798	1H	353.791	510	NA|HvDArTseq-3912798a1|Freq-10|2836_0	NA	0	0	0	1	.	.	0
6272568a1	silicoDArT	6272568	1H	353.791	511	NA|HvDArTseq-6272568a1|Freq-10|8440_0	NA	0	0	1	0	.	.	0
4191580a1	silicoDArT	4191580	1H	354.783	512	NA|HvDArTseq-4191580a1|Freq-10|1823_0	NA	0	0	0	1	.	.	0
3272027a1	silicoDArT	3272027	1H	355.96	513	chr1H|HvDArTseq-3272027a1|Freq-10|0_481524294	chr1H	481524294	2	0	1	.	.	0
3270216a1	silicoDArT	3270216	1H	356.795	514	chrUn|HvDArTseq-3270216a1|Freq-10|0_6519148	chrUn	6519148	1	0	1	.	.	0
3916833a1	silicoDArT	3916833	1H	360.013	515	chr1H|HvDArTseq-3916833a1|Freq-10|0_485167427	chr1H	485167427	2	0	1	.	.	0
11289810a1	silicoDArT	11289810	1H	361.748	516	chr1H|HvDArTseq-11289810a1|Freq-10|0_482689540	chr1H	482689540	1	1	0	.	.	0
6272968a1	SNP	6272968	1H	362.342	517	NA|HvDArTseq-6272968a1|Freq-10|6382_0	NA	0	0	0	1	.	.	0
3911429a1	silicoDArT	3911429	1H	362.342	518	chr1H|HvDArTseq-3911429a1|Freq-10|0_484372636	chr1H	484372636	1	1	0	.	.	0
3666946a1	SNP	3666946	1H	362.342	519	chr1H|HvDArTseq-3666946a1|Freq-10|0_482689540	chr1H	482689540	1	1	0	.	.	6
3258786a1	SNP	3258786	1H	362.342	520	chr1H|HvDArTseq-3258786a1|Freq-10|0_484379155	chr1H	484379155	1	1	0	.	.	0
3264009a1	silicoDArT	3264009	1H	362.342	521	chr1H|HvDArTseq-3264009a1|Freq-10|0_482736815	chr1H	482736815	1	0	1	.	.	0
3914217a1	silicoDArT	3914217	1H	362.342	522	chr1H|HvDArTseq-3914217a1|Freq-10|0_483292815	chr1H	483292815	1	0	1	.	.	0
4016420a1	SNP	4016420	1H	362.342	523	chr1H|HvDArTseq-4016420a1|Freq-10|0_486185362	chr1H	486185362	1	0	1	distorted	.	0
3266005a1	SNP	3266005	1H	363.022	524	NA|HvDArTseq-3266005a1|Freq-10|3488_0	NA	0	0	0	1	.	.	0
4007101a1	silicoDArT	4007101	1H	364.215	525	chr1H|HvDArTseq-4007101a1|Freq-10|0_488767409	chr1H	488767409	1	1	0	.	.	0
6436981a1	silicoDArT	6436981	1H	365.311	526	NA|HvDArTseq-6436981a1|Freq-10|3037_0	NA	0	0	1	0	.	.	0
7237897a1	SNP	7237897	1H	366.38	527	NA|HvDArTseq-7237897a1|Freq-10|5850_0	NA	0	0	0	1	.	.	0
3270669a1	silicoDArT	3270669	1H	366.38	528	chr1H|HvDArTseq-3270669a1|Freq-10|0_490017168	chr1H	490017168	1	1	0	.	.	0
4791189a1	silicoDArT	4791189	1H	366.38	529	NA|HvDArTseq-4791189a1|Freq-10|6806_0	NA	0	0	0	1	.	.	0
3258650a1	SNP	3258650	1H	366.38	530	chr1H|HvDArTseq-3258650a1|Freq-10|0_490369530	chr1H	490369530	1	1	0	distorted	.	0
3273169a1	silicoDArT	3273169	1H	367.706	531	NA|HvDArTseq-3273169a1|Freq-10|10075_0	NA	0	0	1	0	.	.	0
3986017a1	silicoDArT	3986017	1H	369.399	532	chr1H|HvDArTseq-3986017a1|Freq-10|0_490771793	chr1H	490771793	1	0	1	.	.	0
4329913a1	silicoDArT	4329913	1H	369.399	533	chr1H|HvDArTseq-4329913a1|Freq-10|0_491096649	chr1H	491096649	1	1	0	.	.	6
5247960a1	silicoDArT	5247960	1H	369.399	534	chr1H|HvDArTseq-5247960a1|Freq-10|0_490941061	chr1H	490941061	1	1	0	.	.	0
5240905a1	silicoDArT	5240905	1H	369.399	535	NA|HvDArTseq-5240905a1|Freq-10|2214_0	NA	0	0	1	0	.	.	0
3263196a1	SNP	3263196	1H	371.709	536	MM|HvDArTseq-3263196a1|Freq-10|235_0	MM	0	>2	2	0	.	.	0
3397180a1	silicoDArT	3397180	1H	374.171	537	NA|HvDArTseq-3397180a1|Freq-10|2785_0	NA	0	0	0	1	.	.	0
3275718a1	silicoDArT	3275718	1H	374.171	538	NA|HvDArTseq-3275718a1|Freq-10|4799_0	NA	0	0	0	1	.	.	0
5248981a1	silicoDArT	5248981	1H	374.171	539	NA|HvDArTseq-5248981a1|Freq-10|4243_0	NA	0	0	0	1	.	.	0
3269199a1	silicoDArT	3269199	1H	379.742	540	NA|HvDArTseq-3269199a1|Freq-10|8416_0	NA	0	0	0	1	.	.	0
3811732a1	silicoDArT	3811732	1H	381.714	541	chr1H|HvDArTseq-3811732a1|Freq-10|0_496202948	chr1H	496202948	1	-	0	distorted	A allele inferred (non-parental).	0
3255055a1	SNP	3255055	1H	383.186	542	chr1H|HvDArTseq-3255055a1|Freq-10|0_496276499	chr1H	496276499	1	0	1	distorted	.	0
3271281a1	silicoDArT	3271281	1H	383.186	543	chr1H|HvDArTseq-3271281a1|Freq-10|0_503284583	chr1H	503284583	1	1	0	.	.	16
4011910a1	SNP	4011910	1H	383.186	544	chr1H|HvDArTseq-4011910a1|Freq-10|0_495461111	chr1H	495461111	1	1	0	distorted	.	6
3273615a1	silicoDArT	3273615	1H	383.186	545	chr1H|HvDArTseq-3273615a1|Freq-10|0_496274455	chr1H	496274455	1	0	1	distorted	.	0
4174156a1	SNP	4174156	1H	383.186	546	chr1H|HvDArTseq-4174156a1|Freq-10|0_497025201	chr1H	497025201	1	0	1	distorted	.	4
3396389a1	silicoDArT	3396389	1H	383.186	547	chr1H|HvDArTseq-3396389a1|Freq-10|0_498025767	chr1H	498025767	1	0	1	distorted	.	0
3258882a1	silicoDArT	3258882	1H	383.186	548	chr1H|HvDArTseq-3258882a1|Freq-10|0_500582663	chr1H	500582663	1	0	1	.	.	0
3811564a1	silicoDArT	3811564	1H	383.186	549	chr1H|HvDArTseq-3811564a1|Freq-10|0_496276564	chr1H	496276564	1	0	1	distorted	.	0
3986876a1	silicoDArT	3986876	1H	383.186	550	NA|HvDArTseq-3986876a1|Freq-10|6302_0	NA	0	0	0	1	.	.	0
3269441a1	silicoDArT	3269441	1H	383.186	551	chr1H|HvDArTseq-3269441a1|Freq-10|0_500083763	chr1H	500083763	1	0	1	.	.	0
3398511a1	silicoDArT	3398511	1H	383.186	552	chr1H|HvDArTseq-3398511a1|Freq-10|0_502081980	chr1H	502081980	1	0	1	distorted	.	0
3985876a1	silicoDArT	3985876	1H	384.363	553	chr1H|HvDArTseq-3985876a1|Freq-10|0_500938058	chr1H	500938058	1	1	0	distorted	.	0
6429434a1	silicoDArT	6429434	1H	384.363	554	chr1H|HvDArTseq-6429434a1|Freq-10|0_502081980	chr1H	502081980	1	1	-	.	B allele inferred (non-parental).	0
3926288a1	silicoDArT	3926288	1H	385.291	555	NA|HvDArTseq-3926288a1|Freq-10|4241_0	NA	0	0	1	0	.	.	0
3256370a1	SNP	3256370	1H	385.291	556	chr1H|HvDArTseq-3256370a1|Freq-10|0_503654118	chr1H	503654118	1	0	1	distorted	.	1
3665781a1	silicoDArT	3665781	1H	385.291	557	chr1H|HvDArTseq-3665781a1|Freq-10|0_503801669	chr1H	503801669	1	1	0	.	.	0
3264153a1	silicoDArT	3264153	1H	385.291	558	NA|HvDArTseq-3264153a1|Freq-10|4749_0	NA	0	0	1	0	.	.	0
3987213a1	silicoDArT	3987213	1H	385.291	559	NA|HvDArTseq-3987213a1|Freq-10|7713_0	NA	0	0	0	1	.	.	0
5254103a1	silicoDArT	5254103	1H	385.291	560	NA|HvDArTseq-5254103a1|Freq-10|10249_0	NA	0	0	0	1	.	.	0
3664450a1	silicoDArT	3664450	1H	386.513	561	NA|HvDArTseq-3664450a1|Freq-10|8609_0	NA	0	0	0	1	.	.	0
3258034a1	silicoDArT	3258034	1H	388.93	562	chr1H|HvDArTseq-3258034a1|Freq-10|0_504474310	chr1H	504474310	1	1	0	distorted	.	0
4012225a1	silicoDArT	4012225	1H	388.93	563	NA|HvDArTseq-4012225a1|Freq-10|4177_0	NA	0	0	1	0	.	.	0
3276192a1	silicoDArT	3276192	1H	388.93	564	chr1H|HvDArTseq-3276192a1|Freq-10|0_504524132	chr1H	504524132	1	1	0	distorted	.	0
3810860a1	silicoDArT	3810860	1H	388.93	565	NA|HvDArTseq-3810860a1|Freq-10|7282_0	NA	0	0	0	1	.	.	0
4190774a1	SNP	4190774	1H	390.558	566	chr1H|HvDArTseq-4190774a1|Freq-10|0_505899230	chr1H	505899230	1	1	0	distorted	.	2
6436398a1	silicoDArT	6436398	1H	390.558	567	chr1H|HvDArTseq-6436398a1|Freq-10|0_507631482	chr1H	507631482	1	1	0	distorted	.	0
3264909a1	silicoDArT	3264909	1H	391.721	568	chr1H|HvDArTseq-3264909a1|Freq-10|0_507641080	chr1H	507641080	1	0	1	distorted	.	5
3927663a1	silicoDArT	3927663	1H	391.721	569	chr1H|HvDArTseq-3927663a1|Freq-10|0_507641020	chr1H	507641020	1	1	0	distorted	.	0
3985914a1	silicoDArT	3985914	1H	391.721	570	chr1H|HvDArTseq-3985914a1|Freq-10|0_507896969	chr1H	507896969	1	1	0	distorted	.	0
4012847a1	silicoDArT	4012847	1H	391.721	571	chr1H|HvDArTseq-4012847a1|Freq-10|0_507631482	chr1H	507631482	1	0	1	distorted	.	0
3928493a1	silicoDArT	3928493	1H	392.879	572	chr1H|HvDArTseq-3928493a1|Freq-10|0_504803550	chr1H	504803550	1	-	1	distorted	A allele inferred (non-parental).	0
3272655a1	silicoDArT	3272655	1H	395.466	573	NA|HvDArTseq-3272655a1|Freq-10|3970_0	NA	0	0	0	1	.	.	0
3910664a1	silicoDArT	3910664	1H	397.391	574	chr1H|HvDArTseq-3910664a1|Freq-10|0_508563380	chr1H	508563380	1	0	1	distorted	.	0
3665373a1	SNP	3665373	1H	397.391	575	chr1H|HvDArTseq-3665373a1|Freq-10|0_509274903	chr1H	509274903	1	1	0	distorted	.	0
5256563a1	SNP	5256563	1H	398.956	576	chr1H|HvDArTseq-5256563a1|Freq-10|0_509282338	chr1H	509282338	1	1	0	distorted	.	1
3915459a2	SNP	3915459	1H	400.588	577	chr1H|HvDArTseq-3915459a2|Freq-10|0_509404641	chr1H	509404641	1	0	1	distorted	.	0
3915459a1	silicoDArT	3915459	1H	400.588	578	chr1H|HvDArTseq-3915459a1|Freq-10|0_509404641	chr1H	509404641	1	1	0	.	.	0
3257482a1	silicoDArT	3257482	1H	400.588	579	chr1H|HvDArTseq-3257482a1|Freq-10|0_509404641	chr1H	509404641	1	0	1	distorted	.	0
3256481a2	silicoDArT	3256481	1H	402.927	580	chr1H|HvDArTseq-3256481a2|Freq-10|0_509483259	chr1H	509483259	1	0	1	distorted	.	0
3256481a1	silicoDArT	3256481	1H	402.927	581	NA|HvDArTseq-3256481a1|Freq-10|7043_0	NA	0	0	1	0	.	.	3
5250844a1	silicoDArT	5250844	1H	402.927	582	chr1H|HvDArTseq-5250844a1|Freq-10|0_509516089	chr1H	509516089	1	0	1	distorted	.	0
3271545a1	silicoDArT	3271545	1H	404.776	583	chr1H|HvDArTseq-3271545a1|Freq-10|0_509663477	chr1H	509663477	1	0	1	.	.	0
3265166a1	silicoDArT	3265166	1H	404.776	584	chr7H|HvDArTseq-3265166a1|Freq-10|0_16328335	chr7H	16328335	1	0	1	.	.	0
3264595a2	SNP	3264595	1H	406.289	585	chr1H|HvDArTseq-3264595a2|Freq-10|0_510799309	chr1H	510799309	1	1	0	distorted	.	2
4789808a1	silicoDArT	4789808	1H	406.289	586	NA|HvDArTseq-4789808a1|Freq-10|10560_0	NA	0	0	1	0	.	.	0
3662659a1	silicoDArT	3662659	1H	406.289	587	NA|HvDArTseq-3662659a1|Freq-10|2073_0	NA	0	0	1	0	.	.	0
3664578a1	silicoDArT	3664578	1H	406.289	588	chr1H|HvDArTseq-3664578a1|Freq-10|0_510799309	chr1H	510799309	1	1	0	distorted	.	0
3269310a1	silicoDArT	3269310	1H	407.923	589	NA|HvDArTseq-3269310a1|Freq-10|9434_0	NA	0	0	-	0	.	A allele inferred (non-parental).	0
3662472a1	silicoDArT	3662472	1H	410.735	590	chr1H|HvDArTseq-3662472a1|Freq-10|0_513085564	chr1H	513085564	1	1	0	.	.	0
3809751a1	silicoDArT	3809751	1H	410.735	591	NA|HvDArTseq-3809751a1|Freq-10|3500_0	NA	0	0	0	1	.	.	0
4330751a1	silicoDArT	4330751	1H	410.735	592	NA|HvDArTseq-4330751a1|Freq-10|6367_0	NA	0	0	-	0	.	A allele inferred (non-parental).	0
3274237a1	SNP	3274237	1H	411.75	593	chr1H|HvDArTseq-3274237a1|Freq-10|0_514066287	chr1H	514066287	1	0	1	distorted	.	0
3263425a1	silicoDArT	3263425	1H	411.75	594	NA|HvDArTseq-3263425a1|Freq-10|4269_0	NA	0	0	1	0	.	.	0
3268750a1	silicoDArT	3268750	1H	411.75	595	NA|HvDArTseq-3268750a1|Freq-10|596_0	NA	0	0	0	1	.	.	0
3275010a1	silicoDArT	3275010	1H	411.75	596	NA|HvDArTseq-3275010a1|Freq-10|7637_0	NA	0	0	1	0	.	.	0
3270737a1	silicoDArT	3270737	1H	411.75	597	chr1H|HvDArTseq-3270737a1|Freq-10|0_514017942	chr1H	514017942	1	0	1	.	.	0
3269378a1	silicoDArT	3269378	1H	411.75	598	chr1H|HvDArTseq-3269378a1|Freq-10|0_515574276	chr1H	515574276	1	0	1	.	.	0
7752381a1	silicoDArT	7752381	1H	411.75	599	NA|HvDArTseq-7752381a1|Freq-10|9845_0	NA	0	0	0	1	.	.	0
3273699a1	silicoDArT	3273699	1H	411.75	600	NA|HvDArTseq-3273699a1|Freq-10|40_0	NA	0	0	0	1	.	.	0
13142615a1	silicoDArT	13142615	1H	411.75	601	NA|HvDArTseq-13142615a1|Freq-10|5302_0	NA	0	0	1	0	.	.	1
3662715a1	silicoDArT	3662715	1H	411.75	602	chr1H|HvDArTseq-3662715a1|Freq-10|0_514349823	chr1H	514349823	1	1	0	.	.	12
3398142a1	silicoDArT	3398142	1H	411.75	603	MM|HvDArTseq-3398142a1|Freq-10|252_0	MM	0	>2	0	1	.	.	0
3916677a1	silicoDArT	3916677	1H	411.75	604	NA|HvDArTseq-3916677a1|Freq-10|7933_0	NA	0	0	1	0	.	.	0
3270003a1	silicoDArT	3270003	1H	411.75	605	NA|HvDArTseq-3270003a1|Freq-10|4696_0	NA	0	0	0	1	.	.	0
4006829a1	silicoDArT	4006829	1H	411.75	606	NA|HvDArTseq-4006829a1|Freq-10|6324_0	NA	0	0	1	0	.	.	0
3269963a1	silicoDArT	3269963	1H	412.683	607	chr1H|HvDArTseq-3269963a1|Freq-10|0_516270199	chr1H	516270199	1	0	1	.	.	0
3396148a1	silicoDArT	3396148	1H	412.683	608	NA|HvDArTseq-3396148a1|Freq-10|3947_0	NA	0	0	1	0	.	.	0
3274867a1	silicoDArT	3274867	1H	412.683	609	NA|HvDArTseq-3274867a1|Freq-10|4484_0	NA	0	0	1	0	.	.	0
3262067a1	SNP	3262067	1H	412.683	610	chr1H|HvDArTseq-3262067a1|Freq-10|0_516792492	chr1H	516792492	1	1	0	distorted	.	5
3665908a1	SNP	3665908	1H	412.683	611	chr1H|HvDArTseq-3665908a1|Freq-10|0_515936535	chr1H	515936535	2	1	0	distorted	.	0
3257282a1	silicoDArT	3257282	1H	412.683	612	chr1H|HvDArTseq-3257282a1|Freq-10|0_516155805	chr1H	516155805	1	0	1	.	.	0
3266103a1	silicoDArT	3266103	1H	412.683	613	chr1H|HvDArTseq-3266103a1|Freq-10|0_516155805	chr1H	516155805	1	1	0	.	.	0
4791191a1	silicoDArT	4791191	1H	415.597	614	chr1H|HvDArTseq-4791191a1|Freq-10|0_517055856	chr1H	517055856	1	0	1	distorted	.	0
3255958a1	SNP	3255958	1H	418.016	615	chr1H|HvDArTseq-3255958a1|Freq-10|0_517055921	chr1H	517055921	1	0	1	distorted	.	0
3266485a1	silicoDArT	3266485	1H	418.016	616	chr2H|HvDArTseq-3266485a1|Freq-10|0_80752668	chr2H	80752668	1	1	0	.	.	0
4595298a1	silicoDArT	4595298	1H	419.491	617	NA|HvDArTseq-4595298a1|Freq-10|408_0	NA	0	0	1	0	.	.	0
13142556a1	SNP	13142556	1H	419.491	618	chr1H|HvDArTseq-13142556a1|Freq-10|0_517127016	chr1H	517127016	1	0	1	.	.	3
6437199a1	silicoDArT	6437199	1H	419.491	619	NA|HvDArTseq-6437199a1|Freq-10|7507_0	NA	0	0	1	0	.	.	0
4006419a1	silicoDArT	4006419	1H	419.491	620	NA|HvDArTseq-4006419a1|Freq-10|3703_0	NA	0	0	0	1	.	.	0
3260415a1	SNP	3260415	1H	420.36	621	chr1H|HvDArTseq-3260415a1|Freq-10|0_517521601	chr1H	517521601	1	0	1	.	.	3
6280255a1	SNP	6280255	1H	420.36	622	chr1H|HvDArTseq-6280255a1|Freq-10|0_517978772	chr1H	517978772	1	1	0	.	.	0
6436652a1	silicoDArT	6436652	1H	420.36	623	chr1H|HvDArTseq-6436652a1|Freq-10|0_518954677	chr1H	518954677	1	1	0	.	.	0
3662951a1	silicoDArT	3662951	1H	420.36	624	NA|HvDArTseq-3662951a1|Freq-10|4372_0	NA	0	0	1	0	.	.	0
3662051a1	silicoDArT	3662051	1H	422.389	625	NA|HvDArTseq-3662051a1|Freq-10|5779_0	NA	0	0	0	1	.	.	0
3264183a1	silicoDArT	3264183	1H	425.015	626	chr1H|HvDArTseq-3264183a1|Freq-10|0_517738625	chr1H	517738625	1	1	0	.	.	0
3924674a1	silicoDArT	3924674	1H	427.657	627	chr1H|HvDArTseq-3924674a1|Freq-10|0_519110296	chr1H	519110296	1	1	0	.	.	0
3255326a2	SNP	3255326	1H	429.085	628	NA|HvDArTseq-3255326a2|Freq-10|7810_0	NA	0	0	1	0	.	.	0
6250481a1	silicoDArT	6250481	1H	429.085	629	NA|HvDArTseq-6250481a1|Freq-10|6121_0	NA	0	0	1	0	.	.	0
4016824a1	SNP	4016824	1H	429.085	630	NA|HvDArTseq-4016824a1|Freq-10|10216_0	NA	0	0	0	1	.	.	0
3666671a1	silicoDArT	3666671	1H	429.085	631	chr1H|HvDArTseq-3666671a1|Freq-10|0_519649402	chr1H	519649402	1	0	1	.	.	21
3269606a1	silicoDArT	3269606	1H	429.085	632	NA|HvDArTseq-3269606a1|Freq-10|873_0	NA	0	0	0	1	.	.	0
3267177a1	silicoDArT	3267177	1H	429.085	633	NA|HvDArTseq-3267177a1|Freq-10|10090_0	NA	0	0	0	1	.	.	0
3267839a1	silicoDArT	3267839	1H	429.085	634	NA|HvDArTseq-3267839a1|Freq-10|5681_0	NA	0	0	1	0	.	.	0
3270215a1	silicoDArT	3270215	1H	429.085	635	NA|HvDArTseq-3270215a1|Freq-10|3522_0	NA	0	0	0	1	.	.	0
3274007a1	silicoDArT	3274007	1H	430.527	636	NA|HvDArTseq-3274007a1|Freq-10|8770_0	NA	0	0	1	0	.	.	0
4194294a1	silicoDArT	4194294	1H	430.527	637	NA|HvDArTseq-4194294a1|Freq-10|5484_0	NA	0	0	0	1	.	.	0
4184758a1	silicoDArT	4184758	1H	430.527	638	NA|HvDArTseq-4184758a1|Freq-10|9846_0	NA	0	0	0	1	.	.	0
4188124a1	silicoDArT	4188124	1H	430.527	639	NA|HvDArTseq-4188124a1|Freq-10|7972_0	NA	0	0	0	1	.	.	0
8646724a1	SNP	8646724	1H	430.527	640	NA|HvDArTseq-8646724a1|Freq-10|1967_0	NA	0	0	2	0	.	.	14
3664766a1	silicoDArT	3664766	1H	430.527	641	chr7H|HvDArTseq-3664766a1|Freq-10|0_141024096	chr7H	141024096	1	1	0	.	.	0
3917608a1	silicoDArT	3917608	1H	432.512	642	NA|HvDArTseq-3917608a1|Freq-10|8941_0	NA	0	0	1	0	.	.	0
3270027a1	silicoDArT	3270027	1H	433.945	643	chr1H|HvDArTseq-3270027a1|Freq-10|0_521793316	chr1H	521793316	1	0	1	.	.	0
4016652a1	SNP	4016652	1H	434.719	644	chrUn|HvDArTseq-4016652a1|Freq-10|0_53289529	chrUn	53289529	1	0	2	.	.	7
3272230a1	silicoDArT	3272230	1H	435.382	645	chr1H|HvDArTseq-3272230a1|Freq-10|0_522144052	chr1H	522144052	1	0	1	.	.	0
3662686a1	silicoDArT	3662686	1H	436.899	646	NA|HvDArTseq-3662686a1|Freq-10|6261_0	NA	0	0	1	0	.	.	0
3664178a1	silicoDArT	3664178	1H	436.899	647	NA|HvDArTseq-3664178a1|Freq-10|956_0	NA	0	0	1	0	.	.	0
3263715a1	silicoDArT	3263715	1H	436.899	648	NA|HvDArTseq-3263715a1|Freq-10|539_0	NA	0	0	0	1	.	.	0
7582787a1	SNP	7582787	1H	436.899	649	NA|HvDArTseq-7582787a1|Freq-10|1860_0	NA	0	0	2	0	.	.	7
3268960a1	silicoDArT	3268960	1H	441.75	650	NA|HvDArTseq-3268960a1|Freq-10|6350_0	NA	0	0	1	0	.	.	0
3432309a1	SNP	3432309	1H	444.695	651	chr1H|HvDArTseq-3432309a1|Freq-10|0_525966140	chr1H	525966140	1	2	0	.	.	33
3927741a1	SNP	3927741	1H	445.257	652	chr1H|HvDArTseq-3927741a1|Freq-10|0_525674943	chr1H	525674943	1	2	0	.	.	0
3985869a1	silicoDArT	3985869	1H	447.236	653	NA|HvDArTseq-3985869a1|Freq-10|4959_0	NA	0	0	0	1	.	.	0
3272016a1	silicoDArT	3272016	1H	448.822	654	chr1H|HvDArTseq-3272016a1|Freq-10|0_524946167	chr1H	524946167	1	0	1	.	.	0
3271420a2	SNP	3271420	1H	448.822	655	chr1H|HvDArTseq-3271420a2|Freq-10|0_525571557	chr1H	525571557	1	1	0	.	.	2
3272756a1	silicoDArT	3272756	1H	448.822	656	NA|HvDArTseq-3272756a1|Freq-10|2096_0	NA	0	0	0	1	.	.	0
3270362a1	silicoDArT	3270362	1H	448.822	657	chr1H|HvDArTseq-3270362a1|Freq-10|0_524758632	chr1H	524758632	1	0	1	.	.	0
3985712a1	silicoDArT	3985712	1H	448.822	658	chr3H|HvDArTseq-3985712a1|Freq-10|0_197365439	chr3H	197365439	1	0	1	.	.	0
3271420a1	silicoDArT	3271420	1H	448.822	659	chr1H|HvDArTseq-3271420a1|Freq-10|0_525571557	chr1H	525571557	1	0	1	.	.	0
4174402a1	SNP	4174402	1H	449.53	660	chr3H|HvDArTseq-4174402a1|Freq-10|0_197365504	chr3H	197365504	1	1	2	.	.	2
3662632a1	silicoDArT	3662632	1H	450.126	661	NA|HvDArTseq-3662632a1|Freq-10|4046_0	NA	0	0	0	1	.	.	0
3397659a1	silicoDArT	3397659	1H	451.877	662	chr1H|HvDArTseq-3397659a1|Freq-10|0_525571622	chr1H	525571622	1	0	1	.	.	0
6422268a1	silicoDArT	6422268	1H	451.877	663	chr1H|HvDArTseq-6422268a1|Freq-10|0_526172878	chr1H	526172878	1	0	1	.	.	0
3986328a1	silicoDArT	3986328	1H	453.176	664	NA|HvDArTseq-3986328a1|Freq-10|418_0	NA	0	0	1	0	.	.	0
3267733a1	silicoDArT	3267733	1H	453.176	665	NA|HvDArTseq-3267733a1|Freq-10|6993_0	NA	0	0	0	1	.	.	0
3268473a2	SNP	3268473	1H	453.176	666	chr1H|HvDArTseq-3268473a2|Freq-10|0_522901277	chr1H	522901277	1	1	0	.	.	2
3266360a1	silicoDArT	3266360	1H	453.176	667	chr1H|HvDArTseq-3266360a1|Freq-10|0_522900564	chr1H	522900564	1	0	1	.	.	0
3272771a1	silicoDArT	3272771	1H	453.176	668	NA|HvDArTseq-3272771a1|Freq-10|5752_0	NA	0	0	1	0	.	.	0
7933597a1	silicoDArT	7933597	1H	453.176	669	chr1H|HvDArTseq-7933597a1|Freq-10|0_522901277	chr1H	522901277	1	1	0	.	.	0
5255967a1	silicoDArT	5255967	1H	453.176	670	NA|HvDArTseq-5255967a1|Freq-10|8579_0	NA	0	0	1	0	.	.	0
6436773a1	silicoDArT	6436773	1H	453.176	671	NA|HvDArTseq-6436773a1|Freq-10|7345_0	NA	0	0	1	0	.	.	0
3268473a1	silicoDArT	3268473	1H	453.176	672	chr1H|HvDArTseq-3268473a1|Freq-10|0_522901277	chr1H	522901277	1	0	1	.	.	0
3272157a1	silicoDArT	3272157	1H	454.578	673	chr1H|HvDArTseq-3272157a1|Freq-10|0_522485797	chr1H	522485797	1	0	1	.	.	0
3397051a1	silicoDArT	3397051	1H	456.343	674	NA|HvDArTseq-3397051a1|Freq-10|6908_0	NA	0	0	0	1	.	.	0
3274528a1	silicoDArT	3274528	1H	466.893	675	NA|HvDArTseq-3274528a1|Freq-10|5289_0	NA	0	0	1	0	.	.	0
7931919a1	silicoDArT	7931919	1H	485.351	676	NA|HvDArTseq-7931919a1|Freq-10|66_0	NA	0	0	0	1	.	.	0
3262351a1	SNP	3262351	1H	494.091	677	chr1H|HvDArTseq-3262351a1|Freq-10|0_526672365	chr1H	526672365	1	1	0	.	.	0
3268688a1	silicoDArT	3268688	1H	494.091	678	NA|HvDArTseq-3268688a1|Freq-10|8587_0	NA	0	0	0	1	.	.	0
3274509a1	silicoDArT	3274509	1H	494.091	679	NA|HvDArTseq-3274509a1|Freq-10|10395_0	NA	0	0	1	0	.	.	0
3913734a1	silicoDArT	3913734	1H	496.38	680	chr1H|HvDArTseq-3913734a1|Freq-10|0_527456039	chr1H	527456039	1	1	0	distorted	.	0
3275341a2	SNP	3275341	1H	499.088	681	NA|HvDArTseq-3275341a2|Freq-10|7757_0	NA	0	0	2	1	.	.	8
3265183a1	silicoDArT	3265183	1H	500.466	682	NA|HvDArTseq-3265183a1|Freq-10|3401_0	NA	0	0	1	0	.	.	0
6436026a1	silicoDArT	6436026	1H	504.524	683	NA|HvDArTseq-6436026a1|Freq-10|4354_0	NA	0	0	1	0	.	.	0
3263243a2	SNP	3263243	1H	507.333	684	NA|HvDArTseq-3263243a2|Freq-10|934_0	NA	0	0	0	1	.	.	2
3985307a1	silicoDArT	3985307	1H	508.164	685	chr1H|HvDArTseq-3985307a1|Freq-10|0_528147390	chr1H	528147390	1	0	1	.	.	0
3267409a1	silicoDArT	3267409	1H	508.164	686	NA|HvDArTseq-3267409a1|Freq-10|5907_0	NA	0	0	0	1	.	.	0
3264618a1	silicoDArT	3264618	1H	508.164	687	chr1H|HvDArTseq-3264618a1|Freq-10|0_528118160	chr1H	528118160	1	0	1	.	.	0
3260679a1	silicoDArT	3260679	1H	509.002	688	chr1H|HvDArTseq-3260679a1|Freq-10|0_528147452	chr1H	528147452	1	1	0	.	.	0
3986162a1	silicoDArT	3986162	1H	511.189	689	NA|HvDArTseq-3986162a1|Freq-10|404_0	NA	0	0	0	1	.	.	0
3267670a1	silicoDArT	3267670	1H	511.189	690	chr1H|HvDArTseq-3267670a1|Freq-10|0_529869856	chr1H	529869856	1	0	1	.	.	0
3271714a1	silicoDArT	3271714	1H	511.189	691	NA|HvDArTseq-3271714a1|Freq-10|8479_0	NA	0	0	0	1	.	.	0
3267819a1	silicoDArT	3267819	1H	512.547	692	chr1H|HvDArTseq-3267819a1|Freq-10|0_529405037	chr1H	529405037	1	1	0	.	.	0
5250127a1	silicoDArT	5250127	1H	513.251	693	NA|HvDArTseq-5250127a1|Freq-10|6449_0	NA	0	0	1	0	.	.	0
4791459a1	silicoDArT	4791459	1H	513.251	694	NA|HvDArTseq-4791459a1|Freq-10|857_0	NA	0	0	0	1	.	.	0
3266935a1	silicoDArT	3266935	1H	513.251	695	chr1H|HvDArTseq-3266935a1|Freq-10|0_529841408	chr1H	529841408	1	1	0	.	.	0
6277133a1	silicoDArT	6277133	1H	513.855	696	chr1H|HvDArTseq-6277133a1|Freq-10|0_529870680	chr1H	529870680	1	1	0	.	.	6
4196150a1	SNP	4196150	1H	516.846	697	chr4H|HvDArTseq-4196150a1|Freq-10|0_82513458	chr4H	82513458	1	2	0	.	.	3
3930641a1	silicoDArT	3930641	1H	518.642	698	chr1H|HvDArTseq-3930641a1|Freq-10|0_531234416	chr1H	531234416	1	0	1	distorted	.	0
3985986a1	silicoDArT	3985986	1H	520.733	699	chr1H|HvDArTseq-3985986a1|Freq-10|0_532148083	chr1H	532148083	1	0	1	distorted	.	0
6437527a1	SNP	6437527	1H	520.733	700	chr1H|HvDArTseq-6437527a1|Freq-10|0_532921824	chr1H	532921824	1	0	1	distorted	.	0
3662551a1	SNP	3662551	1H	520.733	701	chr1H|HvDArTseq-3662551a1|Freq-10|0_532921824	chr1H	532921824	1	1	0	distorted	.	0
3430827a1	silicoDArT	3430827	1H	520.733	702	chr1H|HvDArTseq-3430827a1|Freq-10|0_532617280	chr1H	532617280	1	0	1	.	.	0
3986557a1	silicoDArT	3986557	1H	520.733	703	chr1H|HvDArTseq-3986557a1|Freq-10|0_532589361	chr1H	532589361	1	0	1	.	.	0
4006891a1	silicoDArT	4006891	1H	520.733	704	NA|HvDArTseq-4006891a1|Freq-10|4113_0	NA	0	0	0	1	.	.	0
4196423a1	silicoDArT	4196423	1H	520.733	705	NA|HvDArTseq-4196423a1|Freq-10|2153_0	NA	0	0	0	1	.	.	0
3265181a1	silicoDArT	3265181	1H	521.454	706	chr1H|HvDArTseq-3265181a1|Freq-10|0_532983691	chr1H	532983691	1	1	0	.	.	7
3263839a1	silicoDArT	3263839	1H	522.119	707	chr1H|HvDArTseq-3263839a1|Freq-10|0_533705509	chr1H	533705509	1	1	0	.	.	0
3270402a1	silicoDArT	3270402	1H	522.119	708	chr1H|HvDArTseq-3270402a1|Freq-10|0_533258416	chr1H	533258416	1	1	0	.	.	0
6436032a1	silicoDArT	6436032	1H	522.119	709	NA|HvDArTseq-6436032a1|Freq-10|9324_0	NA	0	0	-	0	.	A allele inferred (non-parental).	0
5243711a1	silicoDArT	5243711	1H	523.224	710	NA|HvDArTseq-5243711a1|Freq-10|8938_0	NA	0	0	0	1	.	.	0
4783009a1	silicoDArT	4783009	1H	524.169	711	NA|HvDArTseq-4783009a1|Freq-10|5810_0	NA	0	0	0	1	.	.	0
3397904a1	silicoDArT	3397904	1H	524.169	712	chr1H|HvDArTseq-3397904a1|Freq-10|0_533258412	chr1H	533258412	1	0	1	.	.	0
6436482a1	silicoDArT	6436482	1H	524.169	713	NA|HvDArTseq-6436482a1|Freq-10|8321_0	NA	0	0	1	0	.	.	0
6436235a1	silicoDArT	6436235	1H	529.584	714	NA|HvDArTseq-6436235a1|Freq-10|8253_0	NA	0	0	1	0	.	.	0
4190241a1	SNP	4190241	1H	532.457	715	chr1H|HvDArTseq-4190241a1|Freq-10|0_534716183	chr1H	534716183	1	1	0	distorted	.	0
3273230a1	silicoDArT	3273230	1H	532.457	716	chr1H|HvDArTseq-3273230a1|Freq-10|0_536079307	chr1H	536079307	1	1	0	.	.	0
5254054a1	silicoDArT	5254054	1H	532.457	717	NA|HvDArTseq-5254054a1|Freq-10|9363_0	NA	0	0	1	0	.	.	0
3432962a1	silicoDArT	3432962	1H	532.457	718	NA|HvDArTseq-3432962a1|Freq-10|1204_0	NA	0	0	1	0	.	.	0
6278190a1	SNP	6278190	1H	532.457	719	NA|HvDArTseq-6278190a1|Freq-10|7325_0	NA	0	0	1	0	.	.	1
6278189a1	SNP	6278189	1H	532.457	720	NA|HvDArTseq-6278189a1|Freq-10|3926_0	NA	0	0	0	2	.	.	0
5241292a2	SNP	5241292	1H	534.288	721	chr1H|HvDArTseq-5241292a2|Freq-10|0_536568025	chr1H	536568025	1	1	0	.	.	0
4189764a1	silicoDArT	4189764	1H	534.288	722	chr1H|HvDArTseq-4189764a1|Freq-10|0_536568025	chr1H	536568025	1	1	0	.	.	0
5245913a1	silicoDArT	5245913	1H	534.288	723	NA|HvDArTseq-5245913a1|Freq-10|8536_0	NA	0	0	1	0	.	.	0
5241292a1	silicoDArT	5241292	1H	534.288	724	chr1H|HvDArTseq-5241292a1|Freq-10|0_536568025	chr1H	536568025	1	0	1	.	.	0
3261176a1	silicoDArT	3261176	1H	537.906	725	chr1H|HvDArTseq-3261176a1|Freq-10|0_536890953	chr1H	536890953	1	0	1	.	.	0
4790572a1	silicoDArT	4790572	1H	544.606	726	chr1H|HvDArTseq-4790572a1|Freq-10|0_538427111	chr1H	538427111	1	1	0	distorted	.	0
3254849a1	SNP	3254849	1H	547.2	727	NA|HvDArTseq-3254849a1|Freq-10|10173_0	NA	0	0	1	0	.	.	0
4790572a2	SNP	4790572	1H	547.2	728	chr1H|HvDArTseq-4790572a2|Freq-10|0_538427111	chr1H	538427111	1	0	1	.	.	0
3263259a1	silicoDArT	3263259	1H	547.2	729	chr1H|HvDArTseq-3263259a1|Freq-10|0_538583155	chr1H	538583155	1	0	1	.	.	0
3664026a1	silicoDArT	3664026	1H	550.802	730	NA|HvDArTseq-3664026a1|Freq-10|10036_0	NA	0	0	0	1	.	.	0
3999929a1	silicoDArT	3999929	1H	550.802	731	NA|HvDArTseq-3999929a1|Freq-10|8884_0	NA	0	0	1	0	.	.	0
5247710a1	silicoDArT	5247710	1H	550.802	732	NA|HvDArTseq-5247710a1|Freq-10|8076_0	NA	0	0	0	1	.	.	0
3268233a1	silicoDArT	3268233	1H	551.573	733	chr1H|HvDArTseq-3268233a1|Freq-10|0_539824209	chr1H	539824209	1	1	0	.	.	0
3268233a2	SNP	3268233	1H	551.573	734	chr1H|HvDArTseq-3268233a2|Freq-10|0_539824209	chr1H	539824209	1	0	1	.	.	0
3265406a1	silicoDArT	3265406	1H	552.424	735	NA|HvDArTseq-3265406a1|Freq-10|1656_0	NA	0	0	1	0	.	.	0
3268067a1	silicoDArT	3268067	1H	552.424	736	NA|HvDArTseq-3268067a1|Freq-10|3285_0	NA	0	0	-	0	.	A allele inferred (non-parental).	0
3263679a2	SNP	3263679	1H	552.424	737	chr1H|HvDArTseq-3263679a2|Freq-10|0_540653755	chr1H	540653755	1	0	1	.	.	0
3663997a1	silicoDArT	3663997	1H	552.424	738	NA|HvDArTseq-3663997a1|Freq-10|9294_0	NA	0	0	0	1	.	.	6
3272807a1	silicoDArT	3272807	1H	552.424	739	chr1H|HvDArTseq-3272807a1|Freq-10|0_540841223	chr1H	540841223	1	0	1	.	.	0
3266573a1	silicoDArT	3266573	1H	552.424	740	chr1H|HvDArTseq-3266573a1|Freq-10|0_540653755	chr1H	540653755	1	0	1	.	.	0
5253722a1	silicoDArT	5253722	1H	552.424	741	NA|HvDArTseq-5253722a1|Freq-10|255_0	NA	0	0	0	1	.	.	0
3265248a1	silicoDArT	3265248	1H	552.424	742	chr1H|HvDArTseq-3265248a1|Freq-10|0_540977182	chr1H	540977182	1	1	0	.	.	0
3271968a1	silicoDArT	3271968	1H	552.424	743	NA|HvDArTseq-3271968a1|Freq-10|7240_0	NA	0	0	1	0	.	.	0
4174101a1	silicoDArT	4174101	1H	552.424	744	chr1H|HvDArTseq-4174101a1|Freq-10|0_541045954	chr1H	541045954	1	1	0	.	.	0
3264684a1	silicoDArT	3264684	1H	552.424	745	NA|HvDArTseq-3264684a1|Freq-10|5704_0	NA	0	0	1	0	.	.	0
4790184a1	silicoDArT	4790184	1H	552.424	746	NA|HvDArTseq-4790184a1|Freq-10|4333_0	NA	0	0	1	0	.	.	0
3662308a2	SNP	3662308	1H	552.424	747	chr1H|HvDArTseq-3662308a2|Freq-10|0_540796188	chr1H	540796188	1	2	1	.	.	0
5259211a1	silicoDArT	5259211	1H	552.424	748	NA|HvDArTseq-5259211a1|Freq-10|6093_0	NA	0	0	0	1	.	.	0
5337699a1	silicoDArT	5337699	1H	553.094	749	NA|HvDArTseq-5337699a1|Freq-10|5787_0	NA	0	0	0	1	.	.	0
4195458a1	silicoDArT	4195458	1H	554.864	750	NA|HvDArTseq-4195458a1|Freq-10|6532_0	NA	0	0	1	0	.	.	0
3273273a1	silicoDArT	3273273	1H	558.733	751	NA|HvDArTseq-3273273a1|Freq-10|2413_0	NA	0	0	0	1	.	.	0
3266337a1	silicoDArT	3266337	1H	558.733	752	chr1H|HvDArTseq-3266337a1|Freq-10|0_542121379	chr1H	542121379	1	1	0	.	.	0
3266452a1	silicoDArT	3266452	1H	558.733	753	chr1H|HvDArTseq-3266452a1|Freq-10|0_542633059	chr1H	542633059	1	1	0	.	.	0
3811749a1	silicoDArT	3811749	1H	561.338	754	NA|HvDArTseq-3811749a1|Freq-10|2271_0	NA	0	0	0	1	.	.	0
3257585a1	silicoDArT	3257585	1H	563.457	755	chr1H|HvDArTseq-3257585a1|Freq-10|0_544020528	chr1H	544020528	1	0	1	.	.	0
3257585a2	SNP	3257585	1H	563.457	756	chr1H|HvDArTseq-3257585a2|Freq-10|0_544020528	chr1H	544020528	1	1	0	.	.	0
3665046a1	SNP	3665046	1H	563.457	757	chr1H|HvDArTseq-3665046a1|Freq-10|0_543955028	chr1H	543955028	1	0	1	.	.	0
4010661a2	SNP	4010661	1H	563.457	758	chr1H|HvDArTseq-4010661a2|Freq-10|0_543765990	chr1H	543765990	1	0	1	.	.	10
4010661a1	silicoDArT	4010661	1H	563.457	759	chr1H|HvDArTseq-4010661a1|Freq-10|0_543765990	chr1H	543765990	1	1	0	.	.	0
3432532a1	silicoDArT	3432532	1H	563.457	760	NA|HvDArTseq-3432532a1|Freq-10|1674_0	NA	0	0	0	1	.	.	0
3666665a1	silicoDArT	3666665	1H	563.457	761	NA|HvDArTseq-3666665a1|Freq-10|1637_0	NA	0	0	0	1	.	.	0
3269068a1	silicoDArT	3269068	1H	563.457	762	NA|HvDArTseq-3269068a1|Freq-10|6413_0	NA	0	0	1	0	.	.	0
3266081a1	silicoDArT	3266081	1H	563.457	763	NA|HvDArTseq-3266081a1|Freq-10|5542_0	NA	0	0	1	0	.	.	0
5249970a1	silicoDArT	5249970	1H	563.457	764	chr1H|HvDArTseq-5249970a1|Freq-10|0_544020528	chr1H	544020528	1	1	0	.	.	0
4187966a2	SNP	4187966	1H	563.457	765	NA|HvDArTseq-4187966a2|Freq-10|4972_0	NA	0	0	0	1	.	.	0
3271927a1	silicoDArT	3271927	1H	563.457	766	chr1H|HvDArTseq-3271927a1|Freq-10|0_543765990	chr1H	543765990	1	0	1	.	.	0
3263391a1	silicoDArT	3263391	1H	563.457	767	NA|HvDArTseq-3263391a1|Freq-10|8077_0	NA	0	0	0	1	.	.	0
3276622a1	silicoDArT	3276622	1H	563.457	768	NA|HvDArTseq-3276622a1|Freq-10|2387_0	NA	0	0	0	1	.	.	0
4187966a1	silicoDArT	4187966	1H	563.457	769	NA|HvDArTseq-4187966a1|Freq-10|9792_0	NA	0	0	1	0	.	.	0
5251164a1	silicoDArT	5251164	1H	567.858	770	chr1H|HvDArTseq-5251164a1|Freq-10|0_546276570	chr1H	546276570	1	0	1	.	.	0
3257811a1	SNP	3257811	1H	567.858	771	chr1H|HvDArTseq-3257811a1|Freq-10|0_546335520	chr1H	546335520	1	1	0	.	.	5
6435785a1	silicoDArT	6435785	1H	567.858	772	NA|HvDArTseq-6435785a1|Freq-10|1623_0	NA	0	0	1	0	.	.	0
5250780a1	silicoDArT	5250780	1H	568.457	773	NA|HvDArTseq-5250780a1|Freq-10|8023_0	NA	0	0	1	0	.	.	0
5250456a1	silicoDArT	5250456	1H	570.183	774	NA|HvDArTseq-5250456a1|Freq-10|2488_0	NA	0	0	-	0	.	A allele inferred (non-parental).	0
6435626a1	silicoDArT	6435626	1H	570.744	775	NA|HvDArTseq-6435626a1|Freq-10|2376_0	NA	0	0	1	0	.	.	0
6435854a1	silicoDArT	6435854	1H	570.744	776	NA|HvDArTseq-6435854a1|Freq-10|8036_0	NA	0	0	-	0	.	A allele inferred (non-parental).	0
3257974a1	SNP	3257974	1H	570.744	777	NA|HvDArTseq-3257974a1|Freq-10|8009_0	NA	0	0	1	0	.	.	14
3810324a1	silicoDArT	3810324	1H	570.744	778	chr1H|HvDArTseq-3810324a1|Freq-10|0_547254209	chr1H	547254209	1	1	0	.	.	0
6435861a1	silicoDArT	6435861	1H	570.744	779	NA|HvDArTseq-6435861a1|Freq-10|9321_0	NA	0	0	-	0	.	A allele inferred (non-parental).	0
3986989a1	silicoDArT	3986989	1H	570.744	780	NA|HvDArTseq-3986989a1|Freq-10|9982_0	NA	0	0	0	1	.	.	0
5239810a1	silicoDArT	5239810	1H	570.744	781	chr1H|HvDArTseq-5239810a1|Freq-10|0_547353859	chr1H	547353859	1	1	0	.	.	0
6436599a1	silicoDArT	6436599	1H	570.744	782	chr1H|HvDArTseq-6436599a1|Freq-10|0_547143807	chr1H	547143807	1	1	0	.	.	0
3395777a1	silicoDArT	3395777	1H	571.344	783	NA|HvDArTseq-3395777a1|Freq-10|8844_0	NA	0	0	0	1	.	.	0
3266277a1	silicoDArT	3266277	1H	574.247	784	MM|HvDArTseq-3266277a1|Freq-10|24_0	MM	0	>2	0	1	.	.	0
5255045a1	SNP	5255045	1H	578.351	785	chr1H|HvDArTseq-5255045a1|Freq-10|0_547683753	chr1H	547683753	1	1	0	.	.	0
3257471a1	SNP	3257471	1H	578.351	786	NA|HvDArTseq-3257471a1|Freq-10|5551_0	NA	0	0	0	1	.	.	0
3271526a1	silicoDArT	3271526	1H	578.351	787	NA|HvDArTseq-3271526a1|Freq-10|2272_0	NA	0	0	0	1	.	.	0
3262705a1	SNP	3262705	1H	579.336	788	chr1H|HvDArTseq-3262705a1|Freq-10|0_548173970	chr1H	548173970	1	0	1	.	.	3
3256984a1	SNP	3256984	1H	579.336	789	chr1H|HvDArTseq-3256984a1|Freq-10|0_548347372	chr1H	548347372	1	0	1	.	.	0
4014014a1	silicoDArT	4014014	1H	580.105	790	chr1H|HvDArTseq-4014014a1|Freq-10|0_548899854	chr1H	548899854	1	1	0	.	.	0
3265275a1	SNP	3265275	1H	580.105	791	chr3H|HvDArTseq-3265275a1|Freq-10|0_182776247	chr3H	182776247	1	1	0	.	.	2
4594484a1	silicoDArT	4594484	1H	580.105	792	chr1H|HvDArTseq-4594484a1|Freq-10|0_548988698	chr1H	548988698	1	0	-	.	B allele inferred (non-parental).	0
3987200a1	silicoDArT	3987200	1H	580.105	793	chr1H|HvDArTseq-3987200a1|Freq-10|0_548968804	chr1H	548968804	1	0	1	.	.	0
3397520a1	silicoDArT	3397520	1H	580.105	794	chr1H|HvDArTseq-3397520a1|Freq-10|0_548988633	chr1H	548988633	1	0	1	.	.	0
3986958a1	silicoDArT	3986958	1H	580.105	795	chr1H|HvDArTseq-3986958a1|Freq-10|0_548999428	chr1H	548999428	1	1	0	.	.	0
4190179a1	silicoDArT	4190179	1H	580.105	796	NA|HvDArTseq-4190179a1|Freq-10|4646_0	NA	0	0	0	-	.	B allele inferred (non-parental).	0
3927415a1	silicoDArT	3927415	1H	580.803	797	chr1H|HvDArTseq-3927415a1|Freq-10|0_548968804	chr1H	548968804	1	1	0	.	.	0
3812554a1	SNP	3812554	1H	583.277	798	chr1H|HvDArTseq-3812554a1|Freq-10|0_549531200	chr1H	549531200	1	2	0	.	.	0
3264596a2	SNP	3264596	1H	585.559	799	chr1H|HvDArTseq-3264596a2|Freq-10|0_549363340	chr1H	549363340	1	1	0	.	.	12
3264596a1	silicoDArT	3264596	1H	585.559	800	chr1H|HvDArTseq-3264596a1|Freq-10|0_549363340	chr1H	549363340	1	0	1	.	.	0
4185405a1	silicoDArT	4185405	1H	585.559	801	chr1H|HvDArTseq-4185405a1|Freq-10|0_549810188	chr1H	549810188	1	0	1	.	.	0
3662602a1	silicoDArT	3662602	1H	585.559	802	NA|HvDArTseq-3662602a1|Freq-10|4684_0	NA	0	0	0	1	.	.	0
5250032a1	silicoDArT	5250032	1H	585.559	803	chr1H|HvDArTseq-5250032a1|Freq-10|0_550439573	chr1H	550439573	1	1	0	.	.	0
4191034a1	silicoDArT	4191034	1H	586.758	804	chr1H|HvDArTseq-4191034a1|Freq-10|0_549363070	chr1H	549363070	1	0	1	.	.	0
4186565a1	silicoDArT	4186565	1H	587.338	805	chr1H|HvDArTseq-4186565a1|Freq-10|0_549810042	chr1H	549810042	1	0	1	.	.	0
4193589a1	silicoDArT	4193589	1H	587.338	806	chr1H|HvDArTseq-4193589a1|Freq-10|0_549363486	chr1H	549363486	1	0	1	.	.	0
4175096a1	silicoDArT	4175096	1H	587.338	807	chr1H|HvDArTseq-4175096a1|Freq-10|0_549363699	chr1H	549363699	1	0	1	.	.	0
4791622a1	silicoDArT	4791622	1H	588.54	808	chr1H|HvDArTseq-4791622a1|Freq-10|0_549435162	chr1H	549435162	1	0	1	.	.	0
3264434a1	silicoDArT	3264434	1H	590.168	809	NA|HvDArTseq-3264434a1|Freq-10|6658_0	NA	0	0	0	1	.	.	0
3398345a1	SNP	3398345	1H	591.076	810	NA|HvDArTseq-3398345a1|Freq-10|9410_0	NA	0	0	1	0	.	.	11
3267987a1	silicoDArT	3267987	1H	591.076	811	chr1H|HvDArTseq-3267987a1|Freq-10|0_549763525	chr1H	549763525	1	0	1	.	.	0
4780559a1	silicoDArT	4780559	1H	591.076	812	chr1H|HvDArTseq-4780559a1|Freq-10|0_550318568	chr1H	550318568	1	1	0	.	.	0
3264427a1	silicoDArT	3264427	1H	591.076	813	NA|HvDArTseq-3264427a1|Freq-10|3375_0	NA	0	0	1	0	.	.	0
4792382a1	silicoDArT	4792382	1H	591.076	814	NA|HvDArTseq-4792382a1|Freq-10|9815_0	NA	0	0	1	0	.	.	0
5239408a1	silicoDArT	5239408	1H	591.076	815	chr1H|HvDArTseq-5239408a1|Freq-10|0_550544171	chr1H	550544171	1	1	0	.	.	0
3276580a1	silicoDArT	3276580	1H	591.076	816	NA|HvDArTseq-3276580a1|Freq-10|4074_0	NA	0	0	0	1	.	.	0
3430574a2	SNP	3430574	1H	595.275	817	chr1H|HvDArTseq-3430574a2|Freq-10|0_549860910	chr1H	549860910	1	2	1	.	.	0
3430574a1	silicoDArT	3430574	1H	598.827	818	chr1H|HvDArTseq-3430574a1|Freq-10|0_549860910	chr1H	549860910	1	1	0	.	.	0
5242348a2	SNP	5242348	1H	599.987	819	chr1H|HvDArTseq-5242348a2|Freq-10|0_550793714	chr1H	550793714	1	0	1	.	.	46
4173744a1	silicoDArT	4173744	1H	599.987	820	chr1H|HvDArTseq-4173744a1|Freq-10|0_552398394	chr1H	552398394	1	1	0	.	.	0
3267453a1	silicoDArT	3267453	1H	599.987	821	chr1H|HvDArTseq-3267453a1|Freq-10|0_553503532	chr1H	553503532	1	0	1	.	.	0
7185723a1	silicoDArT	7185723	1H	599.987	822	NA|HvDArTseq-7185723a1|Freq-10|6179_0	NA	0	0	0	1	.	.	0
3432519a1	SNP	3432519	1H	600.549	823	MM|HvDArTseq-3432519a1|Freq-10|61_0	MM	0	>2	0	2	.	.	76
3255773a1	SNP	3255773	1H	600.549	824	chr1H|HvDArTseq-3255773a1|Freq-10|0_555851411	chr1H	555851411	1	0	1	.	.	0
3273172a1	silicoDArT	3273172	1H	600.549	825	NA|HvDArTseq-3273172a1|Freq-10|3694_0	NA	0	0	0	1	.	.	0
3265236a1	silicoDArT	3265236	1H	600.549	826	NA|HvDArTseq-3265236a1|Freq-10|2826_0	NA	0	0	0	1	.	.	0
3986006a1	silicoDArT	3986006	1H	600.549	827	chr1H|HvDArTseq-3986006a1|Freq-10|0_554779080	chr1H	554779080	1	0	1	.	.	0
3260118a1	silicoDArT	3260118	1H	600.549	828	chr1H|HvDArTseq-3260118a1|Freq-10|0_554548847	chr1H	554548847	1	0	1	.	.	0
3268585a1	silicoDArT	3268585	1H	600.549	829	NA|HvDArTseq-3268585a1|Freq-10|1735_0	NA	0	0	0	1	.	.	0
3398019a1	silicoDArT	3398019	1H	600.549	830	chr1H|HvDArTseq-3398019a1|Freq-10|0_556183462	chr1H	556183462	1	0	1	.	.	0
3265962a1	silicoDArT	3265962	1H	600.549	831	NA|HvDArTseq-3265962a1|Freq-10|5456_0	NA	0	0	0	1	.	.	0
3272799a1	silicoDArT	3272799	1H	600.549	832	chr4H|HvDArTseq-3272799a1|Freq-10|0_596670907	chr4H	596670907	1	0	1	.	.	0
5248802a1	silicoDArT	5248802	1H	600.549	833	NA|HvDArTseq-5248802a1|Freq-10|9642_0	NA	0	0	0	1	.	.	0
3259120a1	silicoDArT	3259120	1H	601.111	834	chr1H|HvDArTseq-3259120a1|Freq-10|0_554469575	chr1H	554469575	1	0	1	.	.	0
3986107a1	silicoDArT	3986107	1H	602.276	835	chr1H|HvDArTseq-3986107a1|Freq-10|0_554371664	chr1H	554371664	1	0	1	.	.	0
5255878a1	silicoDArT	5255878	1H	602.276	836	NA|HvDArTseq-5255878a1|Freq-10|3697_0	NA	0	0	0	1	.	.	0
6277170a1	SNP	6277170	1H	603.466	837	chrUn|HvDArTseq-6277170a1|Freq-10|0_9469605	chrUn	9469605	1	2	0	.	.	1
3273695a1	silicoDArT	3273695	1H	603.466	838	NA|HvDArTseq-3273695a1|Freq-10|4407_0	NA	0	0	1	0	.	.	0
3264899a1	silicoDArT	3264899	1H	604.028	839	chr1H|HvDArTseq-3264899a1|Freq-10|0_555797815	chr1H	555797815	1	-	0	.	A allele inferred (non-parental).	0
3396129a1	silicoDArT	3396129	1H	605.137	840	NA|HvDArTseq-3396129a1|Freq-10|5039_0	NA	0	0	1	0	.	.	0
3267193a1	silicoDArT	3267193	1H	606.255	841	NA|HvDArTseq-3267193a1|Freq-10|5212_0	NA	0	0	1	0	.	.	0
3257198a1	SNP	3257198	1H	608.534	842	chr1H|HvDArTseq-3257198a1|Freq-10|0_558227461	chr1H	558227461	1	2	0	.	.	0
3985907a1	silicoDArT	3985907	1H	610.861	843	NA|HvDArTseq-3985907a1|Freq-10|10450_0	NA	0	0	1	0	.	.	0
3262364a1	SNP	3262364	1H	611.423	844	chr1H|HvDArTseq-3262364a1|Freq-10|0_558414508	chr1H	558414508	1	1	0	.	.	15
4192704a1	SNP	4192704	1H	611.423	845	NA|HvDArTseq-4192704a1|Freq-10|6981_0	NA	0	0	0	1	.	.	0
5259506a1	silicoDArT	5259506	1H	611.423	846	NA|HvDArTseq-5259506a1|Freq-10|9592_0	NA	0	0	0	1	.	.	0
13142383a1	silicoDArT	13142383	1H	611.423	847	NA|HvDArTseq-13142383a1|Freq-10|6120_0	NA	0	0	0	1	.	.	0
3274098a1	silicoDArT	3274098	1H	613.148	848	NA|HvDArTseq-3274098a1|Freq-10|4394_0	NA	0	0	0	1	.	.	0
11334529a1	silicoDArT	11334529	1H	615.998	849	NA|HvDArTseq-11334529a1|Freq-10|3837_0	NA	0	0	0	1	.	.	0
5249529a1	silicoDArT	5249529	1H	619.868	850	NA|HvDArTseq-5249529a1|Freq-10|4579_0	NA	0	0	1	0	.	.	0
4169827a1	silicoDArT	4169827	1H	626.654	851	chr1H|HvDArTseq-4169827a1|Freq-10|0_550851231	chr1H	550851231	1	1	0	.	.	0
3430253a1	silicoDArT	3430253	2H	0	1	chr2H|HvDArTseq-3430253a1|Freq-10|0_13109793	chr2H	13109793	1	-	1	distorted	A allele inferred (non-parental).	0
5335939a1	silicoDArT	5335939	2H	10.2562	2	chr2H|HvDArTseq-5335939a1|Freq-10|0_2904144	chr2H	2904144	1	1	0	.	.	0
13142341a1	silicoDArT	13142341	2H	12.8443	3	chr2H|HvDArTseq-13142341a1|Freq-10|0_1528920	chr2H	1528920	1	1	0	.	.	0
3269631a1	silicoDArT	3269631	2H	12.8443	4	NA|HvDArTseq-3269631a1|Freq-10|8654_0	NA	0	0	1	0	.	.	0
3396571a1	silicoDArT	3396571	2H	13.605	5	MM|HvDArTseq-3396571a1|Freq-10|122_0	MM	0	>2	1	0	.	.	0
5257036a1	silicoDArT	5257036	2H	14.9474	6	NA|HvDArTseq-5257036a1|Freq-10|5103_0	NA	0	0	1	0	.	.	0
6272535a1	silicoDArT	6272535	2H	18.0072	7	NA|HvDArTseq-6272535a1|Freq-10|4316_0	NA	0	0	1	0	.	.	0
5253509a1	silicoDArT	5253509	2H	21.7256	8	NA|HvDArTseq-5253509a1|Freq-10|7977_0	NA	0	0	1	0	.	.	0
3398077a1	silicoDArT	3398077	2H	23.4993	9	NA|HvDArTseq-3398077a1|Freq-10|5338_0	NA	0	0	1	0	.	.	0
3432460a2	SNP	3432460	2H	24.0611	10	chr2H|HvDArTseq-3432460a2|Freq-10|0_30347528	chr2H	30347528	1	2	0	.	.	13
5255499a1	silicoDArT	5255499	2H	24.0611	11	chr1H|HvDArTseq-5255499a1|Freq-10|0_258386822	chr1H	258386822	2	1	0	.	.	0
3271857a1	silicoDArT	3271857	2H	24.0611	12	chr2H|HvDArTseq-3271857a1|Freq-10|0_2353587	chr2H	2353587	1	1	0	.	.	0
3263323a1	silicoDArT	3263323	2H	25.4192	13	NA|HvDArTseq-3263323a1|Freq-10|6266_0	NA	0	0	0	1	.	.	0
5258513a1	SNP	5258513	2H	25.4192	14	NA|HvDArTseq-5258513a1|Freq-10|9417_0	NA	0	0	1	0	.	.	0
3910715a1	silicoDArT	3910715	2H	26.2635	15	chr2H|HvDArTseq-3910715a1|Freq-10|0_886447	chr2H	886447	1	1	0	.	.	0
3396269a1	silicoDArT	3396269	2H	28.3392	16	NA|HvDArTseq-3396269a1|Freq-10|6028_0	NA	0	0	1	0	.	.	0
3271080a1	silicoDArT	3271080	2H	30.156	17	NA|HvDArTseq-3271080a1|Freq-10|6101_0	NA	0	0	1	0	.	.	0
5250377a1	silicoDArT	5250377	2H	31.2162	18	NA|HvDArTseq-5250377a1|Freq-10|530_0	NA	0	0	1	0	.	.	0
3255509a1	silicoDArT	3255509	2H	31.2162	19	chr2H|HvDArTseq-3255509a1|Freq-10|0_796351	chr2H	796351	1	0	1	.	.	0
3270861a1	silicoDArT	3270861	2H	31.2162	20	NA|HvDArTseq-3270861a1|Freq-10|368_0	NA	0	0	1	0	.	.	0
3397383a1	silicoDArT	3397383	2H	31.2162	21	NA|HvDArTseq-3397383a1|Freq-10|4784_0	NA	0	0	1	0	.	.	0
3987181a1	silicoDArT	3987181	2H	31.2162	22	NA|HvDArTseq-3987181a1|Freq-10|7100_0	NA	0	0	1	0	.	.	0
7187557a1	silicoDArT	7187557	2H	32.6439	23	NA|HvDArTseq-7187557a1|Freq-10|9507_0	NA	0	0	0	1	.	.	0
3985476a1	silicoDArT	3985476	2H	34.9026	24	chr2H|HvDArTseq-3985476a1|Freq-10|0_928948	chr2H	928948	1	0	1	.	.	0
3432782a1	SNP	3432782	2H	35.5055	25	chr5H|HvDArTseq-3432782a1|Freq-10|0_625647123	chr5H	625647123	1	0	2	.	.	12
3270967a1	silicoDArT	3270967	2H	35.5055	26	chr2H|HvDArTseq-3270967a1|Freq-10|0_137967	chr2H	137967	1	0	1	.	.	0
3987268a1	silicoDArT	3987268	2H	37.5115	27	chr2H|HvDArTseq-3987268a1|Freq-10|0_137003	chr2H	137003	1	0	1	.	.	0
3662627a1	silicoDArT	3662627	2H	39.9208	28	chr2H|HvDArTseq-3662627a1|Freq-10|0_1417174	chr2H	1417174	1	1	0	.	.	0
3273404a1	silicoDArT	3273404	2H	43.2017	29	NA|HvDArTseq-3273404a1|Freq-10|2279_0	NA	0	0	0	1	.	.	0
7576182a1	SNP	7576182	2H	47.7367	30	NA|HvDArTseq-7576182a1|Freq-10|87_0	NA	0	0	0	2	.	.	0
3430700a1	silicoDArT	3430700	2H	51.1245	31	chr2H|HvDArTseq-3430700a1|Freq-10|0_6719391	chr2H	6719391	1	0	1	.	.	0
6284441a1	silicoDArT	6284441	2H	53.2619	32	NA|HvDArTseq-6284441a1|Freq-10|3210_0	NA	0	0	0	1	.	.	0
3914685a1	silicoDArT	3914685	2H	56.2066	33	NA|HvDArTseq-3914685a1|Freq-10|2116_0	NA	0	0	0	1	.	.	0
5250662a1	silicoDArT	5250662	2H	58.6201	34	chr2H|HvDArTseq-5250662a1|Freq-10|0_2753773	chr2H	2753773	1	0	1	.	.	0
3257281a1	SNP	3257281	2H	58.6201	35	NA|HvDArTseq-3257281a1|Freq-10|4949_0	NA	0	0	0	2	.	.	91
3395956a1	silicoDArT	3395956	2H	58.6201	36	NA|HvDArTseq-3395956a1|Freq-10|2216_0	NA	0	0	1	0	.	.	0
3430658a1	silicoDArT	3430658	2H	58.6201	37	chr2H|HvDArTseq-3430658a1|Freq-10|0_1362660	chr2H	1362660	1	1	0	.	.	0
7934178a1	silicoDArT	7934178	2H	58.6201	38	MM|HvDArTseq-7934178a1|Freq-10|248_0	MM	0	>2	0	1	.	.	0
3273484a1	silicoDArT	3273484	2H	58.6201	39	NA|HvDArTseq-3273484a1|Freq-10|1558_0	NA	0	0	0	1	.	.	0
3916703a1	silicoDArT	3916703	2H	59.6748	40	NA|HvDArTseq-3916703a1|Freq-10|9333_0	NA	0	0	0	1	.	.	0
7932990a1	silicoDArT	7932990	2H	60.6358	41	chr2H|HvDArTseq-7932990a1|Freq-10|0_3892578	chr2H	3892578	1	0	1	.	.	0
3255592a1	SNP	3255592	2H	60.6358	42	chr2H|HvDArTseq-3255592a1|Freq-10|0_3443580	chr2H	3443580	1	1	0	.	.	9
4193324a1	silicoDArT	4193324	2H	60.6358	43	NA|HvDArTseq-4193324a1|Freq-10|7669_0	NA	0	0	1	0	.	.	0
3986147a1	silicoDArT	3986147	2H	60.6358	44	chr2H|HvDArTseq-3986147a1|Freq-10|0_2356805	chr2H	2356805	1	0	1	.	.	0
3431217a1	silicoDArT	3431217	2H	60.6358	45	NA|HvDArTseq-3431217a1|Freq-10|2427_0	NA	0	0	0	1	.	.	1
3264340a1	silicoDArT	3264340	2H	60.6358	46	NA|HvDArTseq-3264340a1|Freq-10|8269_0	NA	0	0	0	1	.	.	0
3266798a1	silicoDArT	3266798	2H	60.6358	47	NA|HvDArTseq-3266798a1|Freq-10|4798_0	NA	0	0	1	0	.	.	0
3431834a1	silicoDArT	3431834	2H	60.6358	48	NA|HvDArTseq-3431834a1|Freq-10|2963_0	NA	0	0	0	1	.	.	0
5241627a1	silicoDArT	5241627	2H	60.6358	49	NA|HvDArTseq-5241627a1|Freq-10|449_0	NA	0	0	0	1	.	.	0
3270267a1	silicoDArT	3270267	2H	60.6358	50	NA|HvDArTseq-3270267a1|Freq-10|4475_0	NA	0	0	0	1	.	.	0
3273686a1	silicoDArT	3273686	2H	60.6358	51	NA|HvDArTseq-3273686a1|Freq-10|9977_0	NA	0	0	1	0	.	.	0
3267813a1	silicoDArT	3267813	2H	60.6358	52	chr2H|HvDArTseq-3267813a1|Freq-10|0_3655757	chr2H	3655757	1	1	0	.	.	0
3431408a1	silicoDArT	3431408	2H	60.6358	53	NA|HvDArTseq-3431408a1|Freq-10|4489_0	NA	0	0	0	1	.	.	0
3396979a1	silicoDArT	3396979	2H	62.3263	54	chr2H|HvDArTseq-3396979a1|Freq-10|0_5922792	chr2H	5922792	1	0	1	.	.	0
7752008a2	SNP	7752008	2H	63.0397	55	NA|HvDArTseq-7752008a2|Freq-10|5055_0	NA	0	0	1	2	.	.	0
13142378a1	silicoDArT	13142378	2H	64.7682	56	NA|HvDArTseq-13142378a1|Freq-10|8688_0	NA	0	0	0	1	.	.	0
7932755a1	silicoDArT	7932755	2H	66.4902	57	NA|HvDArTseq-7932755a1|Freq-10|7593_0	NA	0	0	0	1	.	.	0
4414793a1	silicoDArT	4414793	2H	67.776	58	chr2H|HvDArTseq-4414793a1|Freq-10|0_8990680	chr2H	8990680	1	0	1	.	.	0
3259420a1	silicoDArT	3259420	2H	68.7207	59	NA|HvDArTseq-3259420a1|Freq-10|9831_0	NA	0	0	1	0	.	.	0
3986630a1	silicoDArT	3986630	2H	68.7207	60	chr2H|HvDArTseq-3986630a1|Freq-10|0_6448143	chr2H	6448143	1	1	0	.	.	0
3985282a1	silicoDArT	3985282	2H	68.7207	61	NA|HvDArTseq-3985282a1|Freq-10|9594_0	NA	0	0	0	1	.	.	0
4193335a1	silicoDArT	4193335	2H	68.7207	62	NA|HvDArTseq-4193335a1|Freq-10|3641_0	NA	0	0	0	1	.	.	0
3273264a1	silicoDArT	3273264	2H	68.7207	63	chr2H|HvDArTseq-3273264a1|Freq-10|0_4540344	chr2H	4540344	1	1	0	.	.	0
3985372a1	silicoDArT	3985372	2H	68.7207	64	chr2H|HvDArTseq-3985372a1|Freq-10|0_5088741	chr2H	5088741	1	0	1	.	.	0
3987388a1	silicoDArT	3987388	2H	68.7207	65	NA|HvDArTseq-3987388a1|Freq-10|5673_0	NA	0	0	0	1	.	.	0
5253276a1	silicoDArT	5253276	2H	68.7207	66	NA|HvDArTseq-5253276a1|Freq-10|3360_0	NA	0	0	0	1	.	.	0
3271306a1	silicoDArT	3271306	2H	68.7207	67	NA|HvDArTseq-3271306a1|Freq-10|809_0	NA	0	0	0	1	.	.	0
3256029a1	SNP	3256029	2H	68.7207	68	chr2H|HvDArTseq-3256029a1|Freq-10|0_8944261	chr2H	8944261	1	1	0	.	.	0
3272114a1	SNP	3272114	2H	68.7207	69	chr2H|HvDArTseq-3272114a1|Freq-10|0_7348116	chr2H	7348116	1	1	0	.	.	0
3264027a1	silicoDArT	3264027	2H	68.7207	70	NA|HvDArTseq-3264027a1|Freq-10|7533_0	NA	0	0	0	1	.	.	0
5248066a1	silicoDArT	5248066	2H	68.7207	71	NA|HvDArTseq-5248066a1|Freq-10|5801_0	NA	0	0	1	0	.	.	0
3266298a1	silicoDArT	3266298	2H	68.7207	72	chr2H|HvDArTseq-3266298a1|Freq-10|0_8172971	chr2H	8172971	1	1	0	.	.	0
3269257a1	silicoDArT	3269257	2H	68.7207	73	chr2H|HvDArTseq-3269257a1|Freq-10|0_6809215	chr2H	6809215	1	1	0	.	.	0
3396497a1	silicoDArT	3396497	2H	68.7207	74	chr2H|HvDArTseq-3396497a1|Freq-10|0_6427564	chr2H	6427564	1	1	0	.	.	0
3999920a1	silicoDArT	3999920	2H	68.7207	75	chr2H|HvDArTseq-3999920a1|Freq-10|0_7353338	chr2H	7353338	1	1	0	.	.	0
3429960a1	silicoDArT	3429960	2H	68.7207	76	chr2H|HvDArTseq-3429960a1|Freq-10|0_8687886	chr2H	8687886	1	0	1	.	.	1
3263542a1	silicoDArT	3263542	2H	68.7207	77	chr2H|HvDArTseq-3263542a1|Freq-10|0_6700607	chr2H	6700607	1	0	1	.	.	4
3268011a1	silicoDArT	3268011	2H	68.7207	78	NA|HvDArTseq-3268011a1|Freq-10|3659_0	NA	0	0	0	1	.	.	0
3397925a1	silicoDArT	3397925	2H	68.7207	79	NA|HvDArTseq-3397925a1|Freq-10|6694_0	NA	0	0	0	1	.	.	1
3271785a1	silicoDArT	3271785	2H	68.7207	80	NA|HvDArTseq-3271785a1|Freq-10|4565_0	NA	0	0	0	1	.	.	0
3430121a1	silicoDArT	3430121	2H	68.7207	81	NA|HvDArTseq-3430121a1|Freq-10|10159_0	NA	0	0	0	-	.	B allele inferred (non-parental).	0
3430365a1	silicoDArT	3430365	2H	68.7207	82	NA|HvDArTseq-3430365a1|Freq-10|10030_0	NA	0	0	0	1	.	.	0
3985724a1	silicoDArT	3985724	2H	68.7207	83	NA|HvDArTseq-3985724a1|Freq-10|5823_0	NA	0	0	0	1	.	.	0
5239939a1	silicoDArT	5239939	2H	68.7207	84	NA|HvDArTseq-5239939a1|Freq-10|2741_0	NA	0	0	0	1	.	.	0
7747670a1	silicoDArT	7747670	2H	68.7207	85	NA|HvDArTseq-7747670a1|Freq-10|3225_0	NA	0	0	0	1	.	.	0
3265914a1	silicoDArT	3265914	2H	68.7207	86	NA|HvDArTseq-3265914a1|Freq-10|7449_0	NA	0	0	0	1	.	.	0
3267888a1	silicoDArT	3267888	2H	68.7207	87	chr2H|HvDArTseq-3267888a1|Freq-10|0_6481216	chr2H	6481216	1	1	0	.	.	0
3274013a1	silicoDArT	3274013	2H	68.7207	88	NA|HvDArTseq-3274013a1|Freq-10|6102_0	NA	0	0	0	1	.	.	0
3999753a1	silicoDArT	3999753	2H	68.7207	89	NA|HvDArTseq-3999753a1|Freq-10|3203_0	NA	0	0	0	1	.	.	0
4196356a1	silicoDArT	4196356	2H	68.7207	90	NA|HvDArTseq-4196356a1|Freq-10|3320_0	NA	0	0	0	1	.	.	0
4594822a1	silicoDArT	4594822	2H	68.7207	91	NA|HvDArTseq-4594822a1|Freq-10|3695_0	NA	0	0	0	1	.	.	0
8600299a1	silicoDArT	8600299	2H	68.7207	92	NA|HvDArTseq-8600299a1|Freq-10|3471_0	NA	0	0	0	1	.	.	0
3264240a1	silicoDArT	3264240	2H	68.7207	93	NA|HvDArTseq-3264240a1|Freq-10|2353_0	NA	0	0	1	0	.	.	0
3918323a1	silicoDArT	3918323	2H	68.7207	94	NA|HvDArTseq-3918323a1|Freq-10|2781_0	NA	0	0	0	1	.	.	0
3255418a1	silicoDArT	3255418	2H	68.7207	95	chr2H|HvDArTseq-3255418a1|Freq-10|0_9291512	chr2H	9291512	1	1	0	.	.	0
3269345a1	silicoDArT	3269345	2H	68.7207	96	chr2H|HvDArTseq-3269345a1|Freq-10|0_4483862	chr2H	4483862	1	0	1	.	.	0
3271154a1	silicoDArT	3271154	2H	68.7207	97	chr2H|HvDArTseq-3271154a1|Freq-10|0_8945072	chr2H	8945072	1	1	0	.	.	0
6435373a1	silicoDArT	6435373	2H	68.7207	98	NA|HvDArTseq-6435373a1|Freq-10|6594_0	NA	0	0	1	0	.	.	0
3395764a1	silicoDArT	3395764	2H	68.7207	99	NA|HvDArTseq-3395764a1|Freq-10|7676_0	NA	0	0	1	0	.	.	74
6437529a1	silicoDArT	6437529	2H	68.7207	100	NA|HvDArTseq-6437529a1|Freq-10|7671_0	NA	0	0	1	0	.	.	0
3260773a1	silicoDArT	3260773	2H	68.7207	101	chr2H|HvDArTseq-3260773a1|Freq-10|0_6876097	chr2H	6876097	1	1	0	.	.	0
3396227a1	silicoDArT	3396227	2H	68.7207	102	chr2H|HvDArTseq-3396227a1|Freq-10|0_8079544	chr2H	8079544	1	-	0	.	A allele inferred (non-parental).	0
3396613a1	silicoDArT	3396613	2H	68.7207	103	chr2H|HvDArTseq-3396613a1|Freq-10|0_8173036	chr2H	8173036	1	1	0	.	.	0
5253323a1	silicoDArT	5253323	2H	68.7207	104	chr4H|HvDArTseq-5253323a1|Freq-10|0_593615707	chr4H	593615707	1	0	1	.	.	0
13142371a1	silicoDArT	13142371	2H	68.7207	105	NA|HvDArTseq-13142371a1|Freq-10|5114_0	NA	0	0	0	1	.	.	0
3395696a1	SNP	3395696	2H	69.7859	106	NA|HvDArTseq-3395696a1|Freq-10|1742_0	NA	0	0	2	1	.	.	1
5250383a1	SNP	5250383	2H	70.9225	107	NA|HvDArTseq-5250383a1|Freq-10|6990_0	NA	0	0	2	0	.	.	4
11119411a1	SNP	11119411	2H	72.059	108	NA|HvDArTseq-11119411a1|Freq-10|2319_0	NA	0	0	2	0	.	.	7
5247975a1	silicoDArT	5247975	2H	72.059	109	NA|HvDArTseq-5247975a1|Freq-10|7538_0	NA	0	0	1	0	.	.	0
6437701a1	silicoDArT	6437701	2H	73.7784	110	NA|HvDArTseq-6437701a1|Freq-10|4015_0	NA	0	0	1	0	.	.	0
3256029a2	SNP	3256029	2H	73.7784	111	chr2H|HvDArTseq-3256029a2|Freq-10|0_8944261	chr2H	8944261	1	1	0	distorted	.	0
3433429a1	SNP	3433429	2H	77.1356	112	NA|HvDArTseq-3433429a1|Freq-10|756_0	NA	0	0	2	0	.	.	1
12530293a1	silicoDArT	12530293	2H	80.4051	113	NA|HvDArTseq-12530293a1|Freq-10|3883_0	NA	0	0	1	0	.	.	0
5250546a1	silicoDArT	5250546	2H	80.4051	114	NA|HvDArTseq-5250546a1|Freq-10|6588_0	NA	0	0	1	0	.	.	0
3999894a1	silicoDArT	3999894	2H	80.4051	115	chr2H|HvDArTseq-3999894a1|Freq-10|0_9000142	chr2H	9000142	1	1	0	.	.	0
3266560a1	silicoDArT	3266560	2H	80.4051	116	NA|HvDArTseq-3266560a1|Freq-10|3098_0	NA	0	0	1	0	.	.	0
6436145a1	silicoDArT	6436145	2H	81.4271	117	NA|HvDArTseq-6436145a1|Freq-10|63_0	NA	0	0	1	0	.	.	0
4007508a1	silicoDArT	4007508	2H	81.4271	118	NA|HvDArTseq-4007508a1|Freq-10|6153_0	NA	0	0	1	0	.	.	0
3985759a1	silicoDArT	3985759	2H	81.4271	119	NA|HvDArTseq-3985759a1|Freq-10|10473_0	NA	0	0	1	0	.	.	0
9767374a1	silicoDArT	9767374	2H	83.3523	120	NA|HvDArTseq-9767374a1|Freq-10|5588_0	NA	0	0	1	0	.	.	0
3913859a1	silicoDArT	3913859	2H	85.5948	121	chr2H|HvDArTseq-3913859a1|Freq-10|0_9060520	chr2H	9060520	1	1	0	.	.	0
3433579a1	silicoDArT	3433579	2H	87.021	122	NA|HvDArTseq-3433579a1|Freq-10|3090_0	NA	0	0	0	1	.	.	0
3263866a1	silicoDArT	3263866	2H	88.4149	123	NA|HvDArTseq-3263866a1|Freq-10|8789_0	NA	0	0	0	1	.	.	0
11293786a1	silicoDArT	11293786	2H	89.8212	124	NA|HvDArTseq-11293786a1|Freq-10|3792_0	NA	0	0	0	1	.	.	0
3985684a1	silicoDArT	3985684	2H	90.6665	125	chr2H|HvDArTseq-3985684a1|Freq-10|0_9028684	chr2H	9028684	1	1	0	.	.	0
3266749a1	silicoDArT	3266749	2H	90.6665	126	chr2H|HvDArTseq-3266749a1|Freq-10|0_9047293	chr2H	9047293	1	0	1	.	.	0
3261154a1	SNP	3261154	2H	90.6665	127	chr2H|HvDArTseq-3261154a1|Freq-10|0_9291136	chr2H	9291136	1	1	0	.	.	0
3430258a2	SNP	3430258	2H	90.6665	128	chr2H|HvDArTseq-3430258a2|Freq-10|0_9291512	chr2H	9291512	1	1	0	.	.	8
4007541a1	silicoDArT	4007541	2H	90.6665	129	NA|HvDArTseq-4007541a1|Freq-10|9587_0	NA	0	0	1	0	.	.	0
3396414a1	silicoDArT	3396414	2H	90.6665	130	NA|HvDArTseq-3396414a1|Freq-10|5868_0	NA	0	0	0	1	.	.	0
3430809a1	silicoDArT	3430809	2H	90.6665	131	chr2H|HvDArTseq-3430809a1|Freq-10|0_10427185	chr2H	10427185	1	1	0	.	.	0
3259352a1	silicoDArT	3259352	2H	90.6665	132	NA|HvDArTseq-3259352a1|Freq-10|10240_0	NA	0	0	0	1	.	.	0
3930974a1	silicoDArT	3930974	2H	90.6665	133	chr2H|HvDArTseq-3930974a1|Freq-10|0_11279468	chr2H	11279468	1	0	1	.	.	0
3269665a1	silicoDArT	3269665	2H	90.6665	134	NA|HvDArTseq-3269665a1|Freq-10|10184_0	NA	0	0	0	1	.	.	0
5241781a1	silicoDArT	5241781	2H	90.6665	135	NA|HvDArTseq-5241781a1|Freq-10|5555_0	NA	0	0	0	1	.	.	0
3256062a1	silicoDArT	3256062	2H	90.6665	136	NA|HvDArTseq-3256062a1|Freq-10|7142_0	NA	0	0	0	1	.	.	0
3430258a1	silicoDArT	3430258	2H	90.6665	137	chr2H|HvDArTseq-3430258a1|Freq-10|0_9291512	chr2H	9291512	1	0	1	.	.	0
4791612a1	SNP	4791612	2H	90.6665	138	chr2H|HvDArTseq-4791612a1|Freq-10|0_11310718	chr2H	11310718	1	1	0	.	.	49
3258277a1	SNP	3258277	2H	90.6665	139	chr2H|HvDArTseq-3258277a1|Freq-10|0_11119596	chr2H	11119596	1	1	0	.	.	0
3266108a1	silicoDArT	3266108	2H	90.6665	140	chr2H|HvDArTseq-3266108a1|Freq-10|0_9026539	chr2H	9026539	1	0	1	.	.	0
3261835a1	silicoDArT	3261835	2H	90.6665	141	NA|HvDArTseq-3261835a1|Freq-10|5187_0	NA	0	0	1	0	.	.	0
3913080a1	silicoDArT	3913080	2H	90.6665	142	NA|HvDArTseq-3913080a1|Freq-10|5299_0	NA	0	0	1	0	.	.	0
6282466a1	silicoDArT	6282466	2H	90.6665	143	chr2H|HvDArTseq-6282466a1|Freq-10|0_13249142	chr2H	13249142	1	1	0	.	.	0
6435767a1	silicoDArT	6435767	2H	90.6665	144	NA|HvDArTseq-6435767a1|Freq-10|9320_0	NA	0	0	1	0	.	.	0
3265926a1	silicoDArT	3265926	2H	90.6665	145	NA|HvDArTseq-3265926a1|Freq-10|10502_0	NA	0	0	1	0	.	.	0
3431258a1	silicoDArT	3431258	2H	90.6665	146	NA|HvDArTseq-3431258a1|Freq-10|187_0	NA	0	0	0	1	.	.	0
3920037a1	silicoDArT	3920037	2H	90.6665	147	chr2H|HvDArTseq-3920037a1|Freq-10|0_11036426	chr2H	11036426	1	0	1	.	.	0
3264531a1	silicoDArT	3264531	2H	90.6665	148	chr2H|HvDArTseq-3264531a1|Freq-10|0_10853899	chr2H	10853899	1	0	1	.	.	0
3266551a1	silicoDArT	3266551	2H	90.6665	149	MM|HvDArTseq-3266551a1|Freq-10|211_0	MM	0	>2	0	1	.	.	0
3985449a1	silicoDArT	3985449	2H	90.6665	150	NA|HvDArTseq-3985449a1|Freq-10|1119_0	NA	0	0	0	1	.	.	0
3914393a2	SNP	3914393	2H	91.5449	151	NA|HvDArTseq-3914393a2|Freq-10|7459_0	NA	0	0	2	1	.	.	4
3265944a1	silicoDArT	3265944	2H	93.2697	152	chr2H|HvDArTseq-3265944a1|Freq-10|0_11897508	chr2H	11897508	1	0	1	.	.	0
3257177a1	SNP	3257177	2H	95.0292	153	chr2H|HvDArTseq-3257177a1|Freq-10|0_12596581	chr2H	12596581	1	1	0	.	.	0
3273621a1	silicoDArT	3273621	2H	95.0292	154	NA|HvDArTseq-3273621a1|Freq-10|10411_0	NA	0	0	1	0	.	.	0
3255082a1	silicoDArT	3255082	2H	95.0292	155	chr2H|HvDArTseq-3255082a1|Freq-10|0_12690957	chr2H	12690957	1	1	0	.	.	0
3396164a1	silicoDArT	3396164	2H	95.0292	156	NA|HvDArTseq-3396164a1|Freq-10|1410_0	NA	0	0	0	1	.	.	67
3271314a2	SNP	3271314	2H	95.0292	157	chr2H|HvDArTseq-3271314a2|Freq-10|0_11898358	chr2H	11898358	1	1	0	.	.	0
3257335a1	silicoDArT	3257335	2H	95.0292	158	chr2H|HvDArTseq-3257335a1|Freq-10|0_12992598	chr2H	12992598	1	0	1	.	.	0
6435619a1	silicoDArT	6435619	2H	95.6242	159	NA|HvDArTseq-6435619a1|Freq-10|3764_0	NA	0	0	1	0	.	.	0
6436603a1	silicoDArT	6436603	2H	97.548	160	chr2H|HvDArTseq-6436603a1|Freq-10|0_9189863	chr2H	9189863	1	1	0	.	.	0
3256297a1	silicoDArT	3256297	2H	100.282	161	chr2H|HvDArTseq-3256297a1|Freq-10|0_4461936	chr2H	4461936	1	1	0	.	.	0
7729755a1	silicoDArT	7729755	2H	106.261	162	NA|HvDArTseq-7729755a1|Freq-10|8506_0	NA	0	0	1	0	.	.	0
13142360a1	silicoDArT	13142360	2H	111.168	163	NA|HvDArTseq-13142360a1|Freq-10|9743_0	NA	0	0	1	0	.	.	0
3271674a1	silicoDArT	3271674	2H	115.408	164	NA|HvDArTseq-3271674a1|Freq-10|1458_0	NA	0	0	-	0	.	A allele inferred (non-parental).	0
13142332a1	silicoDArT	13142332	2H	117.132	165	chr2H|HvDArTseq-13142332a1|Freq-10|0_14235773	chr2H	14235773	1	1	0	.	.	1
3663512a1	silicoDArT	3663512	2H	117.132	166	NA|HvDArTseq-3663512a1|Freq-10|6386_0	NA	0	0	1	0	.	.	0
3263937a1	silicoDArT	3263937	2H	118.899	167	chr2H|HvDArTseq-3263937a1|Freq-10|0_14217480	chr2H	14217480	1	0	1	.	.	0
4595579a1	SNP	4595579	2H	120.076	168	NA|HvDArTseq-4595579a1|Freq-10|2184_0	NA	0	0	0	2	.	.	0
3257047a1	silicoDArT	3257047	2H	120.076	169	MM|HvDArTseq-3257047a1|Freq-10|221_0	MM	0	>2	1	0	.	.	0
3269710a1	silicoDArT	3269710	2H	120.076	170	NA|HvDArTseq-3269710a1|Freq-10|8417_0	NA	0	0	1	0	.	.	0
3397274a1	silicoDArT	3397274	2H	120.076	171	chr2H|HvDArTseq-3397274a1|Freq-10|0_14235312	chr2H	14235312	1	1	0	.	.	0
3256284a1	SNP	3256284	2H	120.076	172	chr2H|HvDArTseq-3256284a1|Freq-10|0_13515989	chr2H	13515989	1	0	1	.	.	0
3929790a1	silicoDArT	3929790	2H	120.076	173	chr2H|HvDArTseq-3929790a1|Freq-10|0_14222031	chr2H	14222031	1	0	1	.	.	0
5248577a1	silicoDArT	5248577	2H	120.076	174	chr2H|HvDArTseq-5248577a1|Freq-10|0_14224634	chr2H	14224634	1	0	1	.	.	0
3258881a1	silicoDArT	3258881	2H	120.076	175	chr2H|HvDArTseq-3258881a1|Freq-10|0_14222096	chr2H	14222096	1	0	-	.	B allele inferred (non-parental).	0
3266974a1	silicoDArT	3266974	2H	120.076	176	NA|HvDArTseq-3266974a1|Freq-10|2111_0	NA	0	0	0	1	.	.	0
3396429a1	silicoDArT	3396429	2H	120.076	177	NA|HvDArTseq-3396429a1|Freq-10|8793_0	NA	0	0	0	1	.	.	0
5243929a1	silicoDArT	5243929	2H	120.076	178	NA|HvDArTseq-5243929a1|Freq-10|7430_0	NA	0	0	1	0	.	.	0
3663907a1	silicoDArT	3663907	2H	120.076	179	NA|HvDArTseq-3663907a1|Freq-10|7511_0	NA	0	0	1	0	.	.	0
4188893a1	silicoDArT	4188893	2H	120.076	180	NA|HvDArTseq-4188893a1|Freq-10|1270_0	NA	0	0	0	1	.	.	0
4783080a1	silicoDArT	4783080	2H	122.448	181	NA|HvDArTseq-4783080a1|Freq-10|1824_0	NA	0	0	0	1	.	.	0
3267108a1	silicoDArT	3267108	2H	128.783	182	NA|HvDArTseq-3267108a1|Freq-10|2735_0	NA	0	0	0	1	.	.	0
3985879a1	silicoDArT	3985879	2H	135.066	183	chr2H|HvDArTseq-3985879a1|Freq-10|0_13246019	chr2H	13246019	1	0	1	.	.	0
3397056a1	silicoDArT	3397056	2H	137.393	184	chr2H|HvDArTseq-3397056a1|Freq-10|0_13260410	chr2H	13260410	1	0	1	.	.	0
3261256a1	SNP	3261256	2H	137.991	185	chr2H|HvDArTseq-3261256a1|Freq-10|0_13316413	chr2H	13316413	1	1	0	.	.	0
3256482a1	SNP	3256482	2H	137.991	186	NA|HvDArTseq-3256482a1|Freq-10|1856_0	NA	0	0	0	1	.	.	0
3260208a1	SNP	3260208	2H	137.991	187	chr2H|HvDArTseq-3260208a1|Freq-10|0_13286119	chr2H	13286119	1	1	0	.	.	0
4017263a1	silicoDArT	4017263	2H	137.991	188	NA|HvDArTseq-4017263a1|Freq-10|2774_0	NA	0	0	1	0	.	.	0
3396654a1	silicoDArT	3396654	2H	137.991	189	chr2H|HvDArTseq-3396654a1|Freq-10|0_13260410	chr2H	13260410	1	-	0	.	A allele inferred (non-parental).	0
6436279a1	silicoDArT	6436279	2H	137.991	190	NA|HvDArTseq-6436279a1|Freq-10|2579_0	NA	0	0	1	0	.	.	0
3272465a1	silicoDArT	3272465	2H	137.991	191	chr2H|HvDArTseq-3272465a1|Freq-10|0_13239965	chr2H	13239965	1	0	1	.	.	0
5255129a1	silicoDArT	5255129	2H	137.991	192	chr2H|HvDArTseq-5255129a1|Freq-10|0_13083219	chr2H	13083219	1	0	1	.	.	0
3276440a1	silicoDArT	3276440	2H	137.991	193	NA|HvDArTseq-3276440a1|Freq-10|2118_0	NA	0	0	0	1	.	.	0
3269255a1	silicoDArT	3269255	2H	139.286	194	NA|HvDArTseq-3269255a1|Freq-10|380_0	NA	0	0	1	0	.	.	0
3256556a1	silicoDArT	3256556	2H	140.892	195	chr2H|HvDArTseq-3256556a1|Freq-10|0_14235377	chr2H	14235377	1	1	0	.	.	0
3985421a1	silicoDArT	3985421	2H	142.592	196	chr2H|HvDArTseq-3985421a1|Freq-10|0_14680470	chr2H	14680470	1	1	0	.	.	7
3262119a1	silicoDArT	3262119	2H	142.592	197	MM|HvDArTseq-3262119a1|Freq-10|266_0	MM	0	>2	0	1	.	.	0
3261327a1	silicoDArT	3261327	2H	142.592	198	NA|HvDArTseq-3261327a1|Freq-10|9293_0	NA	0	0	0	1	.	.	0
3264896a1	silicoDArT	3264896	2H	142.592	199	NA|HvDArTseq-3264896a1|Freq-10|2223_0	NA	0	0	0	1	.	.	0
3268895a1	silicoDArT	3268895	2H	143.701	200	NA|HvDArTseq-3268895a1|Freq-10|8918_0	NA	0	0	1	0	.	.	0
6259805a1	silicoDArT	6259805	2H	145.383	201	NA|HvDArTseq-6259805a1|Freq-10|3111_0	NA	0	0	1	0	.	.	0
6429486a1	SNP	6429486	2H	146.601	202	NA|HvDArTseq-6429486a1|Freq-10|8420_0	NA	0	0	0	1	.	.	14
3264866a1	silicoDArT	3264866	2H	146.601	203	chr2H|HvDArTseq-3264866a1|Freq-10|0_15025896	chr2H	15025896	1	0	1	.	.	0
3257599a1	silicoDArT	3257599	2H	146.601	204	NA|HvDArTseq-3257599a1|Freq-10|1054_0	NA	0	0	0	1	.	.	0
3257005a1	silicoDArT	3257005	2H	146.601	205	NA|HvDArTseq-3257005a1|Freq-10|5896_0	NA	0	0	0	1	.	.	0
3985230a1	silicoDArT	3985230	2H	146.601	206	NA|HvDArTseq-3985230a1|Freq-10|10153_0	NA	0	0	0	1	.	.	0
3430888a1	silicoDArT	3430888	2H	146.601	207	chr2H|HvDArTseq-3430888a1|Freq-10|0_15036757	chr2H	15036757	1	0	1	.	.	0
3274078a1	silicoDArT	3274078	2H	146.601	208	NA|HvDArTseq-3274078a1|Freq-10|417_0	NA	0	0	1	0	.	.	0
3916377a1	silicoDArT	3916377	2H	147.209	209	NA|HvDArTseq-3916377a1|Freq-10|9677_0	NA	0	0	0	1	.	.	0
3662382a1	silicoDArT	3662382	2H	148.345	210	chr2H|HvDArTseq-3662382a1|Freq-10|0_16201009	chr2H	16201009	1	0	1	.	.	0
4184594a1	silicoDArT	4184594	2H	148.345	211	NA|HvDArTseq-4184594a1|Freq-10|9657_0	NA	0	0	0	1	.	.	0
3275155a1	silicoDArT	3275155	2H	148.345	212	NA|HvDArTseq-3275155a1|Freq-10|8038_0	NA	0	0	1	0	.	.	0
3811420a1	silicoDArT	3811420	2H	151.428	213	chr2H|HvDArTseq-3811420a1|Freq-10|0_16101330	chr2H	16101330	1	0	1	distorted	.	0
3264243a1	silicoDArT	3264243	2H	154.452	214	NA|HvDArTseq-3264243a1|Freq-10|667_0	NA	0	0	0	1	.	.	0
3263539a1	silicoDArT	3263539	2H	154.452	215	chr2H|HvDArTseq-3263539a1|Freq-10|0_16390391	chr2H	16390391	1	0	1	.	.	0
3912027a1	silicoDArT	3912027	2H	154.452	216	chr2H|HvDArTseq-3912027a1|Freq-10|0_292595072	chr2H	292595072	1	1	0	.	.	0
3268788a1	silicoDArT	3268788	2H	154.452	217	chr2H|HvDArTseq-3268788a1|Freq-10|0_16390258	chr2H	16390258	1	0	1	.	.	0
3986632a2	SNP	3986632	2H	155.014	218	chr2H|HvDArTseq-3986632a2|Freq-10|0_16827523	chr2H	16827523	1	1	2	.	.	0
5258890a1	silicoDArT	5258890	2H	155.014	219	NA|HvDArTseq-5258890a1|Freq-10|6986_0	NA	0	0	1	0	.	.	0
3269180a1	SNP	3269180	2H	155.576	220	chr2H|HvDArTseq-3269180a1|Freq-10|0_16803311	chr2H	16803311	1	0	1	.	.	0
3273019a1	silicoDArT	3273019	2H	155.576	221	chr2H|HvDArTseq-3273019a1|Freq-10|0_16813227	chr2H	16813227	1	0	1	.	.	0
3269388a1	silicoDArT	3269388	2H	155.576	222	NA|HvDArTseq-3269388a1|Freq-10|7003_0	NA	0	0	0	1	.	.	0
3812591a1	silicoDArT	3812591	2H	155.576	223	chrUn|HvDArTseq-3812591a1|Freq-10|0_9439224	chrUn	9439224	1	1	0	.	.	0
5253407a1	silicoDArT	5253407	2H	155.576	224	chrUn|HvDArTseq-5253407a1|Freq-10|0_9439289	chrUn	9439289	1	1	0	.	.	0
4197794a1	silicoDArT	4197794	2H	155.576	225	chr2H|HvDArTseq-4197794a1|Freq-10|0_17124280	chr2H	17124280	1	1	0	.	.	0
3986637a2	SNP	3986637	2H	155.576	226	chr2H|HvDArTseq-3986637a2|Freq-10|0_16945975	chr2H	16945975	1	1	0	.	.	5
3986637a1	silicoDArT	3986637	2H	155.576	227	chr2H|HvDArTseq-3986637a1|Freq-10|0_16945975	chr2H	16945975	1	0	1	.	.	0
3430786a1	silicoDArT	3430786	2H	155.576	228	NA|HvDArTseq-3430786a1|Freq-10|8494_0	NA	0	0	0	1	.	.	0
5338898a2	SNP	5338898	2H	155.576	229	chr2H|HvDArTseq-5338898a2|Freq-10|0_16914493	chr2H	16914493	1	0	1	.	.	0
3261416a1	SNP	3261416	2H	156.137	230	chr2H|HvDArTseq-3261416a1|Freq-10|0_17049011	chr2H	17049011	1	1	0	.	.	5
3396065a1	silicoDArT	3396065	2H	156.137	231	NA|HvDArTseq-3396065a1|Freq-10|7712_0	NA	0	0	1	0	.	.	0
3397314a1	silicoDArT	3397314	2H	156.137	232	NA|HvDArTseq-3397314a1|Freq-10|9159_0	NA	0	0	0	1	.	.	0
3273473a1	silicoDArT	3273473	2H	156.137	233	NA|HvDArTseq-3273473a1|Freq-10|9814_0	NA	0	0	0	1	.	.	0
3267801a1	silicoDArT	3267801	2H	156.699	234	chr2H|HvDArTseq-3267801a1|Freq-10|0_17149996	chr2H	17149996	1	1	0	.	.	0
3396567a1	silicoDArT	3396567	2H	156.699	235	chr2H|HvDArTseq-3396567a1|Freq-10|0_17154277	chr2H	17154277	1	0	1	.	.	4
13142506a1	silicoDArT	13142506	2H	157.314	236	chr2H|HvDArTseq-13142506a1|Freq-10|0_18640018	chr2H	18640018	2	0	1	.	.	0
3257810a1	silicoDArT	3257810	2H	157.314	237	chr2H|HvDArTseq-3257810a1|Freq-10|0_17150061	chr2H	17150061	1	1	0	.	.	0
3931216a1	SNP	3931216	2H	157.93	238	NA|HvDArTseq-3931216a1|Freq-10|3112_0	NA	0	0	2	0	.	.	19
4174650a1	silicoDArT	4174650	2H	157.93	239	NA|HvDArTseq-4174650a1|Freq-10|3352_0	NA	0	0	0	1	.	.	0
3276755a1	silicoDArT	3276755	2H	157.93	240	NA|HvDArTseq-3276755a1|Freq-10|1238_0	NA	0	0	0	-	.	B allele inferred (non-parental).	0
3264770a1	SNP	3264770	2H	157.93	241	chr2H|HvDArTseq-3264770a1|Freq-10|0_18305819	chr2H	18305819	1	0	1	.	.	0
5261284a1	silicoDArT	5261284	2H	157.93	242	NA|HvDArTseq-5261284a1|Freq-10|8328_0	NA	0	0	0	1	.	.	0
3274742a1	silicoDArT	3274742	2H	157.93	243	NA|HvDArTseq-3274742a1|Freq-10|7229_0	NA	0	0	1	0	.	.	0
3926908a1	silicoDArT	3926908	2H	158.492	244	NA|HvDArTseq-3926908a1|Freq-10|3755_0	NA	0	0	1	0	.	.	0
4016965a1	silicoDArT	4016965	2H	164.07	245	NA|HvDArTseq-4016965a1|Freq-10|4024_0	NA	0	0	0	1	.	.	0
3396383a1	silicoDArT	3396383	2H	178.792	246	chr2H|HvDArTseq-3396383a1|Freq-10|0_17538356	chr2H	17538356	2	1	0	distorted	.	0
3664515a1	silicoDArT	3664515	2H	191.537	247	chr2H|HvDArTseq-3664515a1|Freq-10|0_18688833	chr2H	18688833	1	0	-	.	B allele inferred (non-parental).	0
3264828a1	silicoDArT	3264828	2H	193.888	248	chr2H|HvDArTseq-3264828a1|Freq-10|0_18189306	chr2H	18189306	1	0	1	.	.	0
3396169a1	silicoDArT	3396169	2H	195.047	249	NA|HvDArTseq-3396169a1|Freq-10|8825_0	NA	0	0	0	1	.	.	0
3270321a1	silicoDArT	3270321	2H	196.183	250	NA|HvDArTseq-3270321a1|Freq-10|1288_0	NA	0	0	1	0	.	.	0
3268740a1	silicoDArT	3268740	2H	196.745	251	NA|HvDArTseq-3268740a1|Freq-10|3727_0	NA	0	0	-	0	.	A allele inferred (non-parental).	24
3274108a1	silicoDArT	3274108	2H	196.745	252	NA|HvDArTseq-3274108a1|Freq-10|3830_0	NA	0	0	0	1	.	.	0
3433304a2	SNP	3433304	2H	196.745	253	chr2H|HvDArTseq-3433304a2|Freq-10|0_18294979	chr2H	18294979	1	0	1	.	.	0
3273826a1	silicoDArT	3273826	2H	196.745	254	chr2H|HvDArTseq-3273826a1|Freq-10|0_17279182	chr2H	17279182	1	-	0	.	A allele inferred (non-parental).	0
4013482a1	silicoDArT	4013482	2H	196.745	255	NA|HvDArTseq-4013482a1|Freq-10|7197_0	NA	0	0	0	1	.	.	0
3262763a1	silicoDArT	3262763	2H	196.745	256	chr2H|HvDArTseq-3262763a1|Freq-10|0_18294979	chr2H	18294979	1	0	1	.	.	0
4015357a1	silicoDArT	4015357	2H	196.745	257	NA|HvDArTseq-4015357a1|Freq-10|9103_0	NA	0	0	0	1	.	.	0
5245665a1	silicoDArT	5245665	2H	196.745	258	NA|HvDArTseq-5245665a1|Freq-10|9862_0	NA	0	0	0	1	.	.	0
7751036a1	silicoDArT	7751036	2H	196.745	259	NA|HvDArTseq-7751036a1|Freq-10|8646_0	NA	0	0	0	1	.	.	0
3430234a1	silicoDArT	3430234	2H	196.745	260	NA|HvDArTseq-3430234a1|Freq-10|1194_0	NA	0	0	0	1	.	.	0
3985729a1	silicoDArT	3985729	2H	196.745	261	chr2H|HvDArTseq-3985729a1|Freq-10|0_18278686	chr2H	18278686	1	0	1	.	.	0
4786220a1	silicoDArT	4786220	2H	196.745	262	chr2H|HvDArTseq-4786220a1|Freq-10|0_18359069	chr2H	18359069	1	1	0	.	.	0
3433304a1	silicoDArT	3433304	2H	196.745	263	chr2H|HvDArTseq-3433304a1|Freq-10|0_18294979	chr2H	18294979	1	1	0	.	.	0
4505558a1	silicoDArT	4505558	2H	199.072	264	NA|HvDArTseq-4505558a1|Freq-10|1286_0	NA	0	0	0	1	.	.	0
4330085a1	silicoDArT	4330085	2H	201.4	265	chr2H|HvDArTseq-4330085a1|Freq-10|0_19561739	chr2H	19561739	1	1	0	distorted	.	0
4016148a1	silicoDArT	4016148	2H	202.536	266	NA|HvDArTseq-4016148a1|Freq-10|4854_0	NA	0	0	0	1	.	.	0
4007300a1	silicoDArT	4007300	2H	202.536	267	MM|HvDArTseq-4007300a1|Freq-10|251_0	MM	0	>2	0	1	.	.	0
3431210a1	silicoDArT	3431210	2H	202.536	268	NA|HvDArTseq-3431210a1|Freq-10|971_0	NA	0	0	1	0	.	.	0
4192502a1	silicoDArT	4192502	2H	202.536	269	NA|HvDArTseq-4192502a1|Freq-10|1027_0	NA	0	0	1	0	.	.	0
3985543a1	silicoDArT	3985543	2H	202.536	270	chr2H|HvDArTseq-3985543a1|Freq-10|0_18905921	chr2H	18905921	1	1	0	.	.	0
3985613a1	silicoDArT	3985613	2H	202.536	271	NA|HvDArTseq-3985613a1|Freq-10|7775_0	NA	0	0	1	0	.	.	0
3271725a1	silicoDArT	3271725	2H	202.536	272	NA|HvDArTseq-3271725a1|Freq-10|69_0	NA	0	0	0	1	.	.	0
3272053a1	silicoDArT	3272053	2H	202.536	273	NA|HvDArTseq-3272053a1|Freq-10|7110_0	NA	0	0	1	0	.	.	0
3985523a1	silicoDArT	3985523	2H	202.536	274	chr2H|HvDArTseq-3985523a1|Freq-10|0_19440601	chr2H	19440601	1	1	0	.	.	0
3270311a1	SNP	3270311	2H	202.536	275	NA|HvDArTseq-3270311a1|Freq-10|4576_0	NA	0	0	0	1	.	.	0
3986885a1	silicoDArT	3986885	2H	202.536	276	NA|HvDArTseq-3986885a1|Freq-10|7966_0	NA	0	0	0	1	.	.	0
3266321a1	silicoDArT	3266321	2H	202.536	277	NA|HvDArTseq-3266321a1|Freq-10|3425_0	NA	0	0	0	1	.	.	0
8633447a1	silicoDArT	8633447	2H	202.536	278	NA|HvDArTseq-8633447a1|Freq-10|9580_0	NA	0	0	0	1	.	.	0
7206944a1	silicoDArT	7206944	2H	202.536	279	NA|HvDArTseq-7206944a1|Freq-10|9778_0	NA	0	0	0	1	.	.	0
4174496a1	SNP	4174496	2H	202.536	280	chr1H|HvDArTseq-4174496a1|Freq-10|0_549809541	chr1H	549809541	1	0	1	.	.	0
3918575a1	silicoDArT	3918575	2H	203.098	281	chr2H|HvDArTseq-3918575a1|Freq-10|0_20067665	chr2H	20067665	1	1	0	.	.	0
5255012a1	SNP	5255012	2H	203.098	282	NA|HvDArTseq-5255012a1|Freq-10|810_0	NA	0	0	0	1	.	.	0
7228088a1	silicoDArT	7228088	2H	203.664	283	NA|HvDArTseq-7228088a1|Freq-10|7165_0	NA	0	0	1	0	.	.	0
3256113a1	SNP	3256113	2H	203.664	284	NA|HvDArTseq-3256113a1|Freq-10|9463_0	NA	0	0	0	1	.	.	0
3273486a1	silicoDArT	3273486	2H	203.664	285	NA|HvDArTseq-3273486a1|Freq-10|5483_0	NA	0	0	0	1	.	.	0
3987057a1	silicoDArT	3987057	2H	203.664	286	NA|HvDArTseq-3987057a1|Freq-10|2849_0	NA	0	0	0	1	.	.	0
3256324a1	SNP	3256324	2H	204.229	287	chr2H|HvDArTseq-3256324a1|Freq-10|0_21324776	chr2H	21324776	1	1	0	.	.	0
3255982a1	SNP	3255982	2H	204.229	288	chr2H|HvDArTseq-3255982a1|Freq-10|0_21376517	chr2H	21376517	1	1	0	distorted	.	0
6435242a1	silicoDArT	6435242	2H	205.954	289	NA|HvDArTseq-6435242a1|Freq-10|3638_0	NA	0	0	1	0	.	.	0
3271755a1	silicoDArT	3271755	2H	207.093	290	NA|HvDArTseq-3271755a1|Freq-10|3193_0	NA	0	0	1	0	.	.	0
5255015a1	silicoDArT	5255015	2H	207.093	291	chr2H|HvDArTseq-5255015a1|Freq-10|0_21390214	chr2H	21390214	1	1	0	.	.	0
3263418a1	silicoDArT	3263418	2H	207.093	292	chr2H|HvDArTseq-3263418a1|Freq-10|0_22878150	chr2H	22878150	1	1	0	.	.	0
3259605a2	SNP	3259605	2H	207.093	293	chr2H|HvDArTseq-3259605a2|Freq-10|0_22640361	chr2H	22640361	1	1	0	.	.	0
6278448a1	SNP	6278448	2H	207.093	294	NA|HvDArTseq-6278448a1|Freq-10|2628_0	NA	0	0	1	0	.	.	0
6437215a1	silicoDArT	6437215	2H	207.093	295	chr2H|HvDArTseq-6437215a1|Freq-10|0_22444658	chr2H	22444658	1	1	0	.	.	0
3275071a1	SNP	3275071	2H	207.093	296	NA|HvDArTseq-3275071a1|Freq-10|9570_0	NA	0	0	0	2	.	.	0
3398336a1	SNP	3398336	2H	207.657	297	NA|HvDArTseq-3398336a1|Freq-10|9197_0	NA	0	0	0	1	.	.	3
4006443a1	silicoDArT	4006443	2H	208.407	298	NA|HvDArTseq-4006443a1|Freq-10|6809_0	NA	0	0	1	0	.	.	0
3255023a2	SNP	3255023	2H	208.407	299	chr2H|HvDArTseq-3255023a2|Freq-10|0_23012168	chr2H	23012168	1	1	0	.	.	3
3255023a1	silicoDArT	3255023	2H	208.407	300	chr2H|HvDArTseq-3255023a1|Freq-10|0_23012168	chr2H	23012168	1	0	1	.	.	0
5249632a1	silicoDArT	5249632	2H	208.407	301	chr2H|HvDArTseq-5249632a1|Freq-10|0_23012168	chr2H	23012168	1	1	0	.	.	0
3258673a1	SNP	3258673	2H	209.157	302	chr2H|HvDArTseq-3258673a1|Freq-10|0_24051146	chr2H	24051146	1	0	1	.	.	0
4014410a1	silicoDArT	4014410	2H	212.067	303	NA|HvDArTseq-4014410a1|Freq-10|6818_0	NA	0	0	1	0	.	.	0
4789919a1	silicoDArT	4789919	2H	214.428	304	NA|HvDArTseq-4789919a1|Freq-10|4952_0	NA	0	0	0	1	.	.	0
3434230a1	SNP	3434230	2H	216.153	305	NA|HvDArTseq-3434230a1|Freq-10|4356_0	NA	0	0	2	1	.	.	6
3986381a1	silicoDArT	3986381	2H	216.153	306	chr2H|HvDArTseq-3986381a1|Freq-10|0_24870519	chr2H	24870519	1	0	1	.	.	0
3256001a1	SNP	3256001	2H	216.715	307	chr2H|HvDArTseq-3256001a1|Freq-10|0_25712741	chr2H	25712741	1	0	1	.	.	13
3265874a1	silicoDArT	3265874	2H	216.715	308	NA|HvDArTseq-3265874a1|Freq-10|8985_0	NA	0	0	0	1	.	.	0
4189363a1	silicoDArT	4189363	2H	216.715	309	NA|HvDArTseq-4189363a1|Freq-10|8148_0	NA	0	0	1	0	.	.	0
6437504a1	silicoDArT	6437504	2H	216.715	310	NA|HvDArTseq-6437504a1|Freq-10|5982_0	NA	0	0	1	0	.	.	0
3264671a1	silicoDArT	3264671	2H	217.289	311	chr2H|HvDArTseq-3264671a1|Freq-10|0_26296992	chr2H	26296992	1	0	1	.	.	0
5251408a1	silicoDArT	5251408	2H	217.289	312	chr2H|HvDArTseq-5251408a1|Freq-10|0_26103253	chr2H	26103253	1	1	0	.	.	8
4017315a1	silicoDArT	4017315	2H	217.289	313	chr2H|HvDArTseq-4017315a1|Freq-10|0_26049014	chr2H	26049014	1	1	0	.	.	0
6435439a1	silicoDArT	6435439	2H	217.289	314	chr2H|HvDArTseq-6435439a1|Freq-10|0_26040591	chr2H	26040591	1	1	0	.	.	0
6436436a1	silicoDArT	6436436	2H	217.289	315	chr2H|HvDArTseq-6436436a1|Freq-10|0_26040591	chr2H	26040591	1	0	1	.	.	0
5256118a1	SNP	5256118	2H	217.289	316	chr2H|HvDArTseq-5256118a1|Freq-10|0_26308830	chr2H	26308830	1	0	1	.	.	0
3432484a1	silicoDArT	3432484	2H	217.289	317	chr2H|HvDArTseq-3432484a1|Freq-10|0_26103253	chr2H	26103253	1	0	1	.	.	0
3263997a1	silicoDArT	3263997	2H	217.289	318	chr2H|HvDArTseq-3263997a1|Freq-10|0_26204445	chr2H	26204445	1	0	1	.	.	0
3274004a1	silicoDArT	3274004	2H	217.289	319	chr2H|HvDArTseq-3274004a1|Freq-10|0_26103188	chr2H	26103188	1	0	1	.	.	0
3924609a1	silicoDArT	3924609	2H	217.883	320	chr2H|HvDArTseq-3924609a1|Freq-10|0_26204380	chr2H	26204380	1	0	1	.	.	0
3256566a1	silicoDArT	3256566	2H	222.756	321	chr2H|HvDArTseq-3256566a1|Freq-10|0_28829948	chr2H	28829948	1	1	0	.	.	0
3264655a2	SNP	3264655	2H	226.154	322	NA|HvDArTseq-3264655a2|Freq-10|5972_0	NA	0	0	0	1	distorted	.	1
3811969a1	silicoDArT	3811969	2H	226.154	323	NA|HvDArTseq-3811969a1|Freq-10|8674_0	NA	0	0	0	1	.	.	0
3271721a1	silicoDArT	3271721	2H	227.61	324	NA|HvDArTseq-3271721a1|Freq-10|587_0	NA	0	0	-	0	.	A allele inferred (non-parental).	0
3433098a1	silicoDArT	3433098	2H	230.368	325	NA|HvDArTseq-3433098a1|Freq-10|6879_0	NA	0	0	0	1	.	.	0
3270492a1	silicoDArT	3270492	2H	230.368	326	chr2H|HvDArTseq-3270492a1|Freq-10|0_31264122	chr2H	31264122	1	1	0	.	.	0
6435622a1	silicoDArT	6435622	2H	230.368	327	NA|HvDArTseq-6435622a1|Freq-10|2018_0	NA	0	0	1	0	.	.	10
4189580a1	silicoDArT	4189580	2H	230.368	328	NA|HvDArTseq-4189580a1|Freq-10|8686_0	NA	0	0	0	1	.	.	0
3272719a1	silicoDArT	3272719	2H	230.368	329	chr2H|HvDArTseq-3272719a1|Freq-10|0_31263821	chr2H	31263821	1	0	1	.	.	0
3264200a1	silicoDArT	3264200	2H	230.368	330	chr2H|HvDArTseq-3264200a1|Freq-10|0_31675729	chr2H	31675729	1	1	0	.	.	0
3263605a1	silicoDArT	3263605	2H	230.368	331	NA|HvDArTseq-3263605a1|Freq-10|9121_0	NA	0	0	1	0	.	.	0
3270605a1	silicoDArT	3270605	2H	230.368	332	chr2H|HvDArTseq-3270605a1|Freq-10|0_31212605	chr2H	31212605	1	0	1	.	.	0
3265532a1	silicoDArT	3265532	2H	230.368	333	NA|HvDArTseq-3265532a1|Freq-10|2663_0	NA	0	0	0	1	.	.	0
4174712a1	silicoDArT	4174712	2H	230.368	334	chr2H|HvDArTseq-4174712a1|Freq-10|0_31027147	chr2H	31027147	2	0	1	.	.	0
3255113a1	silicoDArT	3255113	2H	230.368	335	chr2H|HvDArTseq-3255113a1|Freq-10|0_31754704	chr2H	31754704	1	0	1	.	.	0
4007515a1	silicoDArT	4007515	2H	231.788	336	chr2H|HvDArTseq-4007515a1|Freq-10|0_31244317	chr2H	31244317	2	-	0	.	A allele inferred (non-parental).	0
3432915a1	silicoDArT	3432915	2H	233.893	337	NA|HvDArTseq-3432915a1|Freq-10|358_0	NA	0	0	0	1	.	.	0
3255337a1	silicoDArT	3255337	2H	233.893	338	chr2H|HvDArTseq-3255337a1|Freq-10|0_32344191	chr2H	32344191	1	1	0	.	.	0
3267811a1	silicoDArT	3267811	2H	233.893	339	chr2H|HvDArTseq-3267811a1|Freq-10|0_31264122	chr2H	31264122	1	0	1	.	.	0
3987411a1	silicoDArT	3987411	2H	233.893	340	chr5H|HvDArTseq-3987411a1|Freq-10|0_562111849	chr5H	562111849	1	0	1	.	.	0
5250073a1	silicoDArT	5250073	2H	235.383	341	NA|HvDArTseq-5250073a1|Freq-10|8030_0	NA	0	0	1	0	.	.	0
5249833a1	SNP	5249833	2H	235.383	342	NA|HvDArTseq-5249833a1|Freq-10|10422_0	NA	0	0	2	0	.	.	4
3812343a1	SNP	3812343	2H	235.383	343	NA|HvDArTseq-3812343a1|Freq-10|4398_0	NA	0	0	0	2	.	.	0
4170164a1	silicoDArT	4170164	2H	237.486	344	NA|HvDArTseq-4170164a1|Freq-10|6548_0	NA	0	0	1	0	.	.	0
4172248a2	SNP	4172248	2H	240.842	345	chr2H|HvDArTseq-4172248a2|Freq-10|0_34352870	chr2H	34352870	1	1	0	distorted	.	0
8657094a1	SNP	8657094	2H	240.842	346	NA|HvDArTseq-8657094a1|Freq-10|9823_0	NA	0	0	0	1	distorted	.	1
3917793a1	silicoDArT	3917793	2H	240.842	347	chr2H|HvDArTseq-3917793a1|Freq-10|0_34414903	chr2H	34414903	1	1	0	.	.	0
3266886a1	silicoDArT	3266886	2H	240.842	348	NA|HvDArTseq-3266886a1|Freq-10|6020_0	NA	0	0	1	0	.	.	0
4172248a1	silicoDArT	4172248	2H	240.842	349	chr2H|HvDArTseq-4172248a1|Freq-10|0_34352870	chr2H	34352870	1	0	1	.	.	0
3267372a1	silicoDArT	3267372	2H	242.508	350	NA|HvDArTseq-3267372a1|Freq-10|8086_0	NA	0	0	0	1	.	.	0
3266311a1	silicoDArT	3266311	2H	244.762	351	NA|HvDArTseq-3266311a1|Freq-10|6443_0	NA	0	0	1	0	.	.	0
6269560a2	SNP	6269560	2H	244.762	352	chr2H|HvDArTseq-6269560a2|Freq-10|0_35770139	chr2H	35770139	1	1	0	.	.	0
3272573a1	silicoDArT	3272573	2H	244.762	353	NA|HvDArTseq-3272573a1|Freq-10|2554_0	NA	0	0	0	1	.	.	0
3918392a1	silicoDArT	3918392	2H	244.762	354	NA|HvDArTseq-3918392a1|Freq-10|9070_0	NA	0	0	-	0	.	A allele inferred (non-parental).	0
3266182a1	silicoDArT	3266182	2H	244.762	355	chr2H|HvDArTseq-3266182a1|Freq-10|0_35778106	chr2H	35778106	1	1	0	.	.	0
5243545a1	silicoDArT	5243545	2H	244.762	356	NA|HvDArTseq-5243545a1|Freq-10|7439_0	NA	0	0	0	1	.	.	0
6269560a1	silicoDArT	6269560	2H	244.762	357	chr2H|HvDArTseq-6269560a1|Freq-10|0_35770139	chr2H	35770139	1	0	1	.	.	0
3256293a1	silicoDArT	3256293	2H	244.762	358	chr2H|HvDArTseq-3256293a1|Freq-10|0_35604072	chr2H	35604072	1	0	1	.	.	0
3263393a1	silicoDArT	3263393	2H	244.762	359	NA|HvDArTseq-3263393a1|Freq-10|4280_0	NA	0	0	0	1	.	.	0
3432186a1	silicoDArT	3432186	2H	244.762	360	NA|HvDArTseq-3432186a1|Freq-10|10099_0	NA	0	0	0	1	.	.	0
6436399a1	silicoDArT	6436399	2H	245.707	361	NA|HvDArTseq-6436399a1|Freq-10|8362_0	NA	0	0	1	0	.	.	0
3272695a1	SNP	3272695	2H	248.778	362	chr2H|HvDArTseq-3272695a1|Freq-10|0_36337392	chr2H	36337392	1	1	0	distorted	.	0
3396899a1	silicoDArT	3396899	2H	248.778	363	NA|HvDArTseq-3396899a1|Freq-10|1634_0	NA	0	0	0	1	.	.	0
3396931a1	silicoDArT	3396931	2H	250.029	364	NA|HvDArTseq-3396931a1|Freq-10|7802_0	NA	0	0	0	1	.	.	0
3397835a1	SNP	3397835	2H	250.029	365	NA|HvDArTseq-3397835a1|Freq-10|5512_0	NA	0	0	0	1	.	.	0
3665296a1	SNP	3665296	2H	250.029	366	chr2H|HvDArTseq-3665296a1|Freq-10|0_39322793	chr2H	39322793	1	1	0	.	.	13
3265001a1	silicoDArT	3265001	2H	250.029	367	NA|HvDArTseq-3265001a1|Freq-10|959_0	NA	0	0	1	0	.	.	0
3917185a1	silicoDArT	3917185	2H	250.029	368	chr3H|HvDArTseq-3917185a1|Freq-10|0_383389061	chr3H	383389061	2	1	0	.	.	0
6436705a1	silicoDArT	6436705	2H	250.029	369	NA|HvDArTseq-6436705a1|Freq-10|3324_0	NA	0	0	1	0	.	.	0
3396583a1	silicoDArT	3396583	2H	250.029	370	NA|HvDArTseq-3396583a1|Freq-10|3161_0	NA	0	0	0	1	.	.	0
3929661a1	silicoDArT	3929661	2H	250.029	371	NA|HvDArTseq-3929661a1|Freq-10|10206_0	NA	0	0	1	0	.	.	0
5250928a1	silicoDArT	5250928	2H	250.029	372	NA|HvDArTseq-5250928a1|Freq-10|8381_0	NA	0	0	0	1	.	.	0
3269249a1	silicoDArT	3269249	2H	250.029	373	NA|HvDArTseq-3269249a1|Freq-10|2342_0	NA	0	0	0	1	.	.	1
3396535a1	SNP	3396535	2H	250.029	374	NA|HvDArTseq-3396535a1|Freq-10|9066_0	NA	0	0	1	0	.	.	0
3265321a1	silicoDArT	3265321	2H	250.029	375	NA|HvDArTseq-3265321a1|Freq-10|276_0	NA	0	0	0	1	.	.	0
3268521a1	silicoDArT	3268521	2H	250.029	376	NA|HvDArTseq-3268521a1|Freq-10|6693_0	NA	0	0	0	1	.	.	0
3274890a1	silicoDArT	3274890	2H	250.029	377	NA|HvDArTseq-3274890a1|Freq-10|9904_0	NA	0	0	0	1	.	.	0
3274337a1	silicoDArT	3274337	2H	250.029	378	chr2H|HvDArTseq-3274337a1|Freq-10|0_36920900	chr2H	36920900	1	0	1	.	.	0
4791234a1	silicoDArT	4791234	2H	250.029	379	NA|HvDArTseq-4791234a1|Freq-10|44_0	NA	0	0	0	1	.	.	0
4006762a1	silicoDArT	4006762	2H	250.029	380	NA|HvDArTseq-4006762a1|Freq-10|2931_0	NA	0	0	0	1	.	.	0
6436791a1	silicoDArT	6436791	2H	250.029	381	chr2H|HvDArTseq-6436791a1|Freq-10|0_36724619	chr2H	36724619	1	1	0	.	.	0
3665968a1	silicoDArT	3665968	2H	250.029	382	NA|HvDArTseq-3665968a1|Freq-10|8054_0	NA	0	0	-	0	.	A allele inferred (non-parental).	0
3272628a1	silicoDArT	3272628	2H	250.029	383	NA|HvDArTseq-3272628a1|Freq-10|7556_0	NA	0	0	1	0	.	.	0
3398209a1	SNP	3398209	2H	250.029	384	chr2H|HvDArTseq-3398209a1|Freq-10|0_36286447	chr2H	36286447	2	0	1	.	.	1
5258089a1	SNP	5258089	2H	250.029	385	NA|HvDArTseq-5258089a1|Freq-10|3338_0	NA	0	0	0	2	.	.	1
3265661a1	silicoDArT	3265661	2H	250.029	386	NA|HvDArTseq-3265661a1|Freq-10|4487_0	NA	0	0	0	1	.	.	0
3396993a1	silicoDArT	3396993	2H	250.029	387	NA|HvDArTseq-3396993a1|Freq-10|9228_0	NA	0	0	0	1	.	.	0
5253412a1	silicoDArT	5253412	2H	250.029	388	chr2H|HvDArTseq-5253412a1|Freq-10|0_36724554	chr2H	36724554	1	-	0	.	A allele inferred (non-parental).	0
3985663a1	silicoDArT	3985663	2H	250.029	389	chr6H|HvDArTseq-3985663a1|Freq-10|0_576906857	chr6H	576906857	1	0	1	.	.	0
4192953a1	silicoDArT	4192953	2H	250.029	390	NA|HvDArTseq-4192953a1|Freq-10|7566_0	NA	0	0	0	1	.	.	0
4185057a1	silicoDArT	4185057	2H	250.029	391	NA|HvDArTseq-4185057a1|Freq-10|2764_0	NA	0	0	1	0	.	.	0
5251016a1	silicoDArT	5251016	2H	250.685	392	NA|HvDArTseq-5251016a1|Freq-10|3085_0	NA	0	0	1	0	.	.	0
6436323a1	silicoDArT	6436323	2H	250.685	393	NA|HvDArTseq-6436323a1|Freq-10|786_0	NA	0	0	1	0	.	.	0
3269617a1	silicoDArT	3269617	2H	251.387	394	NA|HvDArTseq-3269617a1|Freq-10|993_0	NA	0	0	1	0	.	.	0
6267848a1	silicoDArT	6267848	2H	251.387	395	NA|HvDArTseq-6267848a1|Freq-10|85_0	NA	0	0	1	0	.	.	0
3916300a1	silicoDArT	3916300	2H	252.063	396	chr6H|HvDArTseq-3916300a1|Freq-10|0_8191450	chr6H	8191450	2	0	1	.	.	0
3263566a1	silicoDArT	3263566	2H	252.063	397	NA|HvDArTseq-3263566a1|Freq-10|5295_0	NA	0	0	0	1	.	.	0
3269550a1	SNP	3269550	2H	252.063	398	chr2H|HvDArTseq-3269550a1|Freq-10|0_44648659	chr2H	44648659	1	0	2	.	.	10
3254748a1	silicoDArT	3254748	2H	252.063	399	NA|HvDArTseq-3254748a1|Freq-10|10572_0	NA	0	0	1	0	.	.	0
3272645a1	silicoDArT	3272645	2H	252.063	400	chr2H|HvDArTseq-3272645a1|Freq-10|0_43643424	chr2H	43643424	1	0	1	.	.	0
3273364a1	silicoDArT	3273364	2H	252.063	401	NA|HvDArTseq-3273364a1|Freq-10|3356_0	NA	0	0	0	1	.	.	0
3262605a1	silicoDArT	3262605	2H	252.063	402	MM|HvDArTseq-3262605a1|Freq-10|57_0	MM	0	>2	0	1	.	.	0
3664571a1	silicoDArT	3664571	2H	252.063	403	chr2H|HvDArTseq-3664571a1|Freq-10|0_44648659	chr2H	44648659	1	0	1	.	.	0
4189612a1	silicoDArT	4189612	2H	252.063	404	NA|HvDArTseq-4189612a1|Freq-10|1239_0	NA	0	0	1	0	.	.	0
3271666a1	silicoDArT	3271666	2H	252.063	405	chr2H|HvDArTseq-3271666a1|Freq-10|0_42375246	chr2H	42375246	1	1	0	.	.	0
3810535a1	silicoDArT	3810535	2H	253.292	406	NA|HvDArTseq-3810535a1|Freq-10|632_0	NA	0	0	0	1	.	.	0
3256024a1	SNP	3256024	2H	254.956	407	chr2H|HvDArTseq-3256024a1|Freq-10|0_43864666	chr2H	43864666	2	0	1	.	.	0
3431635a1	silicoDArT	3431635	2H	254.956	408	MM|HvDArTseq-3431635a1|Freq-10|150_0	MM	0	>2	1	0	.	.	0
3811159a1	silicoDArT	3811159	2H	254.956	409	NA|HvDArTseq-3811159a1|Freq-10|2270_0	NA	0	0	1	0	.	.	0
3433663a1	silicoDArT	3433663	2H	254.956	410	chr2H|HvDArTseq-3433663a1|Freq-10|0_42962551	chr2H	42962551	1	1	0	.	.	0
3809851a1	silicoDArT	3809851	2H	254.956	411	chr3H|HvDArTseq-3809851a1|Freq-10|0_677340635	chr3H	677340635	1	1	0	.	.	0
6283623a1	SNP	6283623	2H	254.956	412	NA|HvDArTseq-6283623a1|Freq-10|5485_0	NA	0	0	2	0	.	.	15
3267913a1	silicoDArT	3267913	2H	255.576	413	chr2H|HvDArTseq-3267913a1|Freq-10|0_41984561	chr2H	41984561	1	1	0	.	.	3
3432413a1	SNP	3432413	2H	257.849	414	chr2H|HvDArTseq-3432413a1|Freq-10|0_45351678	chr2H	45351678	1	1	0	.	.	0
3432344a1	SNP	3432344	2H	258.897	415	NA|HvDArTseq-3432344a1|Freq-10|7820_0	NA	0	0	1	0	.	.	0
3271005a1	silicoDArT	3271005	2H	259.869	416	chr2H|HvDArTseq-3271005a1|Freq-10|0_45576728	chr2H	45576728	2	0	1	.	.	0
3432504a1	SNP	3432504	2H	259.869	417	chr2H|HvDArTseq-3432504a1|Freq-10|0_45577750	chr2H	45577750	1	0	1	.	.	2
4194968a1	silicoDArT	4194968	2H	260.755	418	NA|HvDArTseq-4194968a1|Freq-10|50_0	NA	0	0	1	0	.	.	0
6436491a1	silicoDArT	6436491	2H	261.487	419	chr2H|HvDArTseq-6436491a1|Freq-10|0_45742751	chr2H	45742751	1	1	0	.	.	1
6430237a1	SNP	6430237	2H	262.623	420	NA|HvDArTseq-6430237a1|Freq-10|9145_0	NA	0	0	2	0	.	.	0
3265140a1	silicoDArT	3265140	2H	263.942	421	NA|HvDArTseq-3265140a1|Freq-10|2384_0	NA	0	0	0	1	.	.	0
3270101a1	silicoDArT	3270101	2H	265.043	422	chr2H|HvDArTseq-3270101a1|Freq-10|0_45653210	chr2H	45653210	1	0	-	.	B allele inferred (non-parental).	0
3266503a1	silicoDArT	3266503	2H	265.043	423	NA|HvDArTseq-3266503a1|Freq-10|8758_0	NA	0	0	0	1	.	.	0
5241413a1	silicoDArT	5241413	2H	265.043	424	chr2H|HvDArTseq-5241413a1|Freq-10|0_45702070	chr2H	45702070	1	0	1	.	.	0
3272954a1	silicoDArT	3272954	2H	265.043	425	chr2H|HvDArTseq-3272954a1|Freq-10|0_46152106	chr2H	46152106	2	1	0	.	.	0
3270186a1	SNP	3270186	2H	265.043	426	chr2H|HvDArTseq-3270186a1|Freq-10|0_45679277	chr2H	45679277	1	1	0	.	.	0
3274175a1	silicoDArT	3274175	2H	265.043	427	MM|HvDArTseq-3274175a1|Freq-10|65_0	MM	0	>2	0	1	.	.	0
3916068a1	silicoDArT	3916068	2H	265.043	428	chr2H|HvDArTseq-3916068a1|Freq-10|0_45700092	chr2H	45700092	1	0	1	.	.	0
3275813a1	silicoDArT	3275813	2H	265.043	429	NA|HvDArTseq-3275813a1|Freq-10|837_0	NA	0	0	0	1	.	.	0
3255050a1	silicoDArT	3255050	2H	265.043	430	NA|HvDArTseq-3255050a1|Freq-10|2668_0	NA	0	0	0	1	.	.	0
3276914a1	silicoDArT	3276914	2H	265.043	431	NA|HvDArTseq-3276914a1|Freq-10|3125_0	NA	0	0	1	0	.	.	0
3272497a2	SNP	3272497	2H	265.043	432	chr6H|HvDArTseq-3272497a2|Freq-10|0_295114958	chr6H	295114958	1	2	1	.	.	28
4173509a1	silicoDArT	4173509	2H	273.711	433	chr2H|HvDArTseq-4173509a1|Freq-10|0_45653275	chr2H	45653275	2	0	1	distorted	.	0
11335070a1	silicoDArT	11335070	2H	284.692	434	NA|HvDArTseq-11335070a1|Freq-10|5496_0	NA	0	0	1	0	.	.	0
3397997a1	silicoDArT	3397997	2H	289.755	435	chr2H|HvDArTseq-3397997a1|Freq-10|0_46818837	chr2H	46818837	1	0	1	.	.	0
3432553a1	SNP	3432553	2H	290.733	436	NA|HvDArTseq-3432553a1|Freq-10|904_0	NA	0	0	0	1	.	.	0
3431270a1	silicoDArT	3431270	2H	290.733	437	NA|HvDArTseq-3431270a1|Freq-10|6231_0	NA	0	0	0	1	.	.	0
5240822a1	silicoDArT	5240822	2H	290.733	438	chr2H|HvDArTseq-5240822a1|Freq-10|0_46818837	chr2H	46818837	1	1	0	.	.	0
3257535a1	SNP	3257535	2H	290.733	439	chr2H|HvDArTseq-3257535a1|Freq-10|0_46763366	chr2H	46763366	1	0	1	.	.	6
3429760a1	silicoDArT	3429760	2H	290.733	440	chr2H|HvDArTseq-3429760a1|Freq-10|0_46833547	chr2H	46833547	1	0	1	.	.	0
3434082a1	silicoDArT	3434082	2H	290.733	441	chr2H|HvDArTseq-3434082a1|Freq-10|0_46763431	chr2H	46763431	1	0	1	.	.	0
3932372a1	SNP	3932372	2H	291.848	442	chr2H|HvDArTseq-3932372a1|Freq-10|0_47438120	chr2H	47438120	1	0	1	.	.	0
4006557a1	silicoDArT	4006557	2H	293.564	443	NA|HvDArTseq-4006557a1|Freq-10|9011_0	NA	0	0	1	0	.	.	0
6281688a1	silicoDArT	6281688	2H	294.571	444	NA|HvDArTseq-6281688a1|Freq-10|3034_0	NA	0	0	1	0	.	.	8
3431369a1	silicoDArT	3431369	2H	294.571	445	chr2H|HvDArTseq-3431369a1|Freq-10|0_47774873	chr2H	47774873	1	0	1	.	.	0
3919090a1	silicoDArT	3919090	2H	294.571	446	NA|HvDArTseq-3919090a1|Freq-10|4934_0	NA	0	0	0	1	.	.	0
3924817a1	SNP	3924817	2H	294.571	447	chr2H|HvDArTseq-3924817a1|Freq-10|0_47929181	chr2H	47929181	1	0	1	.	.	0
3273154a1	silicoDArT	3273154	2H	295.572	448	chr2H|HvDArTseq-3273154a1|Freq-10|0_49099506	chr2H	49099506	1	0	1	.	.	0
4185463a1	silicoDArT	4185463	2H	295.572	449	chr2H|HvDArTseq-4185463a1|Freq-10|0_49901224	chr2H	49901224	2	0	1	.	.	0
4193921a1	silicoDArT	4193921	2H	295.572	450	NA|HvDArTseq-4193921a1|Freq-10|10027_0	NA	0	0	1	0	.	.	0
3930745a1	silicoDArT	3930745	2H	295.572	451	NA|HvDArTseq-3930745a1|Freq-10|3186_0	NA	0	0	1	0	.	.	0
5250605a1	silicoDArT	5250605	2H	295.572	452	chr2H|HvDArTseq-5250605a1|Freq-10|0_49901224	chr2H	49901224	2	1	0	.	.	0
11335069a1	SNP	11335069	2H	295.572	453	NA|HvDArTseq-11335069a1|Freq-10|5499_0	NA	0	0	1	2	.	.	0
3910788a1	silicoDArT	3910788	2H	295.572	454	NA|HvDArTseq-3910788a1|Freq-10|3647_0	NA	0	0	1	0	.	.	3
3395909a1	silicoDArT	3395909	2H	297.303	455	chr3H|HvDArTseq-3395909a1|Freq-10|0_336951873	chr3H	336951873	1	0	1	.	.	0
6437532a1	silicoDArT	6437532	2H	297.303	456	chr2H|HvDArTseq-6437532a1|Freq-10|0_49750714	chr2H	49750714	1	1	0	.	.	8
6437635a1	silicoDArT	6437635	2H	297.303	457	NA|HvDArTseq-6437635a1|Freq-10|1381_0	NA	0	0	1	0	.	.	0
3914736a1	silicoDArT	3914736	2H	297.303	458	NA|HvDArTseq-3914736a1|Freq-10|3175_0	NA	0	0	1	0	.	.	0
6435746a1	silicoDArT	6435746	2H	297.303	459	chr2H|HvDArTseq-6435746a1|Freq-10|0_50289875	chr2H	50289875	1	1	0	.	.	0
7174962a1	silicoDArT	7174962	2H	298.79	460	NA|HvDArTseq-7174962a1|Freq-10|1898_0	NA	0	0	1	0	.	.	0
13142512a1	silicoDArT	13142512	2H	301.174	461	NA|HvDArTseq-13142512a1|Freq-10|2714_0	NA	0	0	1	0	.	.	1
5249704a1	silicoDArT	5249704	2H	305.757	462	NA|HvDArTseq-5249704a1|Freq-10|3804_0	NA	0	0	1	0	.	.	0
6280053a1	silicoDArT	6280053	2H	309.052	463	chr2H|HvDArTseq-6280053a1|Freq-10|0_54263782	chr2H	54263782	1	1	0	.	.	0
3266079a1	silicoDArT	3266079	2H	309.052	464	chr2H|HvDArTseq-3266079a1|Freq-10|0_52917462	chr2H	52917462	1	1	0	.	.	0
3270560a1	silicoDArT	3270560	2H	309.052	465	chr2H|HvDArTseq-3270560a1|Freq-10|0_53717963	chr2H	53717963	1	0	1	.	.	0
6435412a1	silicoDArT	6435412	2H	309.052	466	chr2H|HvDArTseq-6435412a1|Freq-10|0_52803657	chr2H	52803657	1	1	0	.	.	0
3275881a1	silicoDArT	3275881	2H	309.052	467	chr2H|HvDArTseq-3275881a1|Freq-10|0_51926825	chr2H	51926825	1	0	1	.	.	0
3258803a1	silicoDArT	3258803	2H	309.052	468	chr2H|HvDArTseq-3258803a1|Freq-10|0_50752048	chr2H	50752048	1	1	0	.	.	0
3665632a1	silicoDArT	3665632	2H	309.951	469	chr2H|HvDArTseq-3665632a1|Freq-10|0_54263782	chr2H	54263782	1	0	1	.	.	0
4010521a1	silicoDArT	4010521	2H	309.951	470	chr2H|HvDArTseq-4010521a1|Freq-10|0_50741277	chr2H	50741277	1	1	0	.	.	0
4188082a1	silicoDArT	4188082	2H	309.951	471	NA|HvDArTseq-4188082a1|Freq-10|6696_0	NA	0	0	0	1	.	.	0
3263085a1	SNP	3263085	2H	309.951	472	chr2H|HvDArTseq-3263085a1|Freq-10|0_52372920	chr2H	52372920	1	0	1	.	.	0
3257890a1	silicoDArT	3257890	2H	309.951	473	chr2H|HvDArTseq-3257890a1|Freq-10|0_52929268	chr2H	52929268	1	0	1	.	.	0
3275479a1	silicoDArT	3275479	2H	309.951	474	chr2H|HvDArTseq-3275479a1|Freq-10|0_54754884	chr2H	54754884	1	1	0	.	.	0
3985365a1	silicoDArT	3985365	2H	309.951	475	chr2H|HvDArTseq-3985365a1|Freq-10|0_53202187	chr2H	53202187	1	0	1	.	.	0
3396846a2	SNP	3396846	2H	309.951	476	chr2H|HvDArTseq-3396846a2|Freq-10|0_50752048	chr2H	50752048	1	1	0	.	.	26
3396735a1	silicoDArT	3396735	2H	309.951	477	NA|HvDArTseq-3396735a1|Freq-10|651_0	NA	0	0	0	1	.	.	0
3396846a1	silicoDArT	3396846	2H	309.951	478	chr2H|HvDArTseq-3396846a1|Freq-10|0_50752048	chr2H	50752048	1	0	1	.	.	2
3917093a1	silicoDArT	3917093	2H	309.951	479	NA|HvDArTseq-3917093a1|Freq-10|2762_0	NA	0	0	1	0	.	.	0
3255689a1	silicoDArT	3255689	2H	309.951	480	chr2H|HvDArTseq-3255689a1|Freq-10|0_50741282	chr2H	50741282	1	0	1	.	.	0
3927246a1	silicoDArT	3927246	2H	309.951	481	chr2H|HvDArTseq-3927246a1|Freq-10|0_53286936	chr2H	53286936	1	0	1	.	.	0
3275303a1	silicoDArT	3275303	2H	309.951	482	NA|HvDArTseq-3275303a1|Freq-10|1047_0	NA	0	0	0	1	.	.	0
7752170a1	silicoDArT	7752170	2H	309.951	483	NA|HvDArTseq-7752170a1|Freq-10|3501_0	NA	0	0	0	1	.	.	0
9772343a1	silicoDArT	9772343	2H	313.084	484	NA|HvDArTseq-9772343a1|Freq-10|9894_0	NA	0	0	0	1	.	.	0
3928050a1	silicoDArT	3928050	2H	314.986	485	chr4H|HvDArTseq-3928050a1|Freq-10|0_544741608	chr4H	544741608	1	1	0	.	.	0
4017228a1	silicoDArT	4017228	2H	314.986	486	NA|HvDArTseq-4017228a1|Freq-10|8651_0	NA	0	0	1	0	.	.	0
3397124a1	SNP	3397124	2H	314.986	487	NA|HvDArTseq-3397124a1|Freq-10|4033_0	NA	0	0	2	0	.	.	0
3269235a1	silicoDArT	3269235	2H	314.986	488	chr2H|HvDArTseq-3269235a1|Freq-10|0_57273149	chr2H	57273149	1	0	1	.	.	0
3269374a1	silicoDArT	3269374	2H	314.986	489	chr2H|HvDArTseq-3269374a1|Freq-10|0_55725071	chr2H	55725071	1	1	0	.	.	0
3917162a1	silicoDArT	3917162	2H	314.986	490	NA|HvDArTseq-3917162a1|Freq-10|6566_0	NA	0	0	1	0	.	.	0
3266781a1	silicoDArT	3266781	2H	314.986	491	NA|HvDArTseq-3266781a1|Freq-10|10341_0	NA	0	0	0	1	.	.	0
4017069a1	silicoDArT	4017069	2H	314.986	492	NA|HvDArTseq-4017069a1|Freq-10|6015_0	NA	0	0	1	0	.	.	0
3432655a1	SNP	3432655	2H	314.986	493	chr2H|HvDArTseq-3432655a1|Freq-10|0_55705758	chr2H	55705758	1	1	0	.	.	4
3270949a1	silicoDArT	3270949	2H	314.986	494	chr2H|HvDArTseq-3270949a1|Freq-10|0_57273149	chr2H	57273149	1	1	0	.	.	3
5251162a1	silicoDArT	5251162	2H	314.986	495	NA|HvDArTseq-5251162a1|Freq-10|8031_0	NA	0	0	1	0	.	.	0
4791121a1	silicoDArT	4791121	2H	314.986	496	NA|HvDArTseq-4791121a1|Freq-10|1244_0	NA	0	0	1	0	.	.	0
13142592a1	silicoDArT	13142592	2H	316.096	497	NA|HvDArTseq-13142592a1|Freq-10|8830_0	NA	0	0	1	0	.	.	0
3264174a1	silicoDArT	3264174	2H	317.776	498	chr2H|HvDArTseq-3264174a1|Freq-10|0_56718237	chr2H	56718237	1	0	1	.	.	0
3910729a1	silicoDArT	3910729	2H	328.053	499	chr2H|HvDArTseq-3910729a1|Freq-10|0_58597388	chr2H	58597388	1	1	0	.	.	0
3430016a1	silicoDArT	3430016	2H	335.58	500	NA|HvDArTseq-3430016a1|Freq-10|10345_0	NA	0	0	1	0	.	.	0
3254659a1	SNP	3254659	2H	335.58	501	chr2H|HvDArTseq-3254659a1|Freq-10|0_58720592	chr2H	58720592	1	1	0	.	.	9
4197638a1	silicoDArT	4197638	2H	335.58	502	NA|HvDArTseq-4197638a1|Freq-10|6793_0	NA	0	0	-	0	.	A allele inferred (non-parental).	0
3662536a1	silicoDArT	3662536	2H	335.58	503	chr2H|HvDArTseq-3662536a1|Freq-10|0_58959356	chr2H	58959356	2	0	1	.	.	0
3665574a1	SNP	3665574	2H	335.58	504	chr2H|HvDArTseq-3665574a1|Freq-10|0_58543733	chr2H	58543733	1	1	0	.	.	0
5245256a1	silicoDArT	5245256	2H	335.58	505	NA|HvDArTseq-5245256a1|Freq-10|9693_0	NA	0	0	0	1	.	.	0
3664792a1	silicoDArT	3664792	2H	335.58	506	NA|HvDArTseq-3664792a1|Freq-10|8591_0	NA	0	0	1	0	.	.	0
3255112a1	SNP	3255112	2H	336.4	507	chr2H|HvDArTseq-3255112a1|Freq-10|0_59207462	chr2H	59207462	1	0	1	.	.	1
3269562a1	silicoDArT	3269562	2H	336.4	508	chr2H|HvDArTseq-3269562a1|Freq-10|0_59213798	chr2H	59213798	1	1	0	.	.	0
3915360a1	silicoDArT	3915360	2H	337.466	509	chrUn|HvDArTseq-3915360a1|Freq-10|0_11164543	chrUn	11164543	1	1	0	.	.	0
4793408a1	silicoDArT	4793408	2H	338.043	510	NA|HvDArTseq-4793408a1|Freq-10|6171_0	NA	0	0	1	0	.	.	0
6430342a1	silicoDArT	6430342	2H	338.043	511	NA|HvDArTseq-6430342a1|Freq-10|9390_0	NA	0	0	1	0	.	.	0
3662139a1	silicoDArT	3662139	2H	338.607	512	NA|HvDArTseq-3662139a1|Freq-10|7562_0	NA	0	0	1	0	.	.	0
3811313a1	silicoDArT	3811313	2H	338.607	513	NA|HvDArTseq-3811313a1|Freq-10|3458_0	NA	0	0	0	1	.	.	3
5253909a1	silicoDArT	5253909	2H	338.607	514	NA|HvDArTseq-5253909a1|Freq-10|4255_0	NA	0	0	0	1	.	.	0
3430077a1	silicoDArT	3430077	2H	341.48	515	NA|HvDArTseq-3430077a1|Freq-10|10284_0	NA	0	0	0	1	.	.	0
3665111a1	silicoDArT	3665111	2H	343.996	516	NA|HvDArTseq-3665111a1|Freq-10|9328_0	NA	0	0	0	1	.	.	0
3263891a1	silicoDArT	3263891	2H	343.996	517	chrUn|HvDArTseq-3263891a1|Freq-10|0_11164089	chrUn	11164089	1	0	1	.	.	0
3929270a1	silicoDArT	3929270	2H	343.996	518	chr2H|HvDArTseq-3929270a1|Freq-10|0_64542210	chr2H	64542210	1	1	0	.	.	0
5261498a2	SNP	5261498	2H	343.996	519	NA|HvDArTseq-5261498a2|Freq-10|636_0	NA	0	0	0	1	.	.	0
5251524a1	SNP	5251524	2H	343.996	520	chr2H|HvDArTseq-5251524a1|Freq-10|0_62985760	chr2H	62985760	1	1	2	.	.	25
5244014a1	silicoDArT	5244014	2H	343.996	521	NA|HvDArTseq-5244014a1|Freq-10|2977_0	NA	0	0	0	1	.	.	0
5255949a1	silicoDArT	5255949	2H	343.996	522	NA|HvDArTseq-5255949a1|Freq-10|6434_0	NA	0	0	1	0	.	.	0
5254868a1	SNP	5254868	2H	343.996	523	chr2H|HvDArTseq-5254868a1|Freq-10|0_63056634	chr2H	63056634	1	1	0	.	.	0
4787388a1	silicoDArT	4787388	2H	344.557	524	NA|HvDArTseq-4787388a1|Freq-10|7522_0	NA	0	0	-	1	.	A allele inferred (non-parental).	0
3255144a1	SNP	3255144	2H	346.627	525	chr2H|HvDArTseq-3255144a1|Freq-10|0_69647265	chr2H	69647265	1	0	1	.	.	0
3259130a1	silicoDArT	3259130	2H	346.627	526	chr2H|HvDArTseq-3259130a1|Freq-10|0_69201658	chr2H	69201658	1	0	-	.	B allele inferred (non-parental).	0
4016098a1	silicoDArT	4016098	2H	347.431	527	NA|HvDArTseq-4016098a1|Freq-10|3576_0	NA	0	0	1	0	.	.	1
5255947a1	silicoDArT	5255947	2H	353.276	528	NA|HvDArTseq-5255947a1|Freq-10|4326_0	NA	0	0	0	-	.	B allele inferred (non-parental).	0
5254053a1	silicoDArT	5254053	2H	358.43	529	NA|HvDArTseq-5254053a1|Freq-10|2942_0	NA	0	0	0	1	.	.	0
3266155a1	silicoDArT	3266155	2H	358.43	530	NA|HvDArTseq-3266155a1|Freq-10|139_0	NA	0	0	0	1	.	.	0
5262404a1	silicoDArT	5262404	2H	358.43	531	NA|HvDArTseq-5262404a1|Freq-10|6675_0	NA	0	0	0	1	.	.	0
5339063a1	SNP	5339063	2H	359.567	532	chrUn|HvDArTseq-5339063a1|Freq-10|0_11812154	chrUn	11812154	1	0	2	.	.	2
3434219a1	SNP	3434219	2H	360.19	533	chr2H|HvDArTseq-3434219a1|Freq-10|0_79714791	chr2H	79714791	1	0	1	.	.	0
3666989a1	silicoDArT	3666989	2H	360.19	534	chr2H|HvDArTseq-3666989a1|Freq-10|0_79376648	chr2H	79376648	1	0	1	.	.	0
3666989a2	SNP	3666989	2H	360.19	535	chr2H|HvDArTseq-3666989a2|Freq-10|0_79376648	chr2H	79376648	1	1	0	.	.	0
3433839a1	silicoDArT	3433839	2H	360.19	536	NA|HvDArTseq-3433839a1|Freq-10|1236_0	NA	0	0	1	0	.	.	1
3985418a1	silicoDArT	3985418	2H	360.19	537	chr2H|HvDArTseq-3985418a1|Freq-10|0_78612959	chr2H	78612959	1	0	1	.	.	0
4185601a1	silicoDArT	4185601	2H	360.19	538	NA|HvDArTseq-4185601a1|Freq-10|1017_0	NA	0	0	0	1	.	.	0
3256131a1	SNP	3256131	2H	360.19	539	chr2H|HvDArTseq-3256131a1|Freq-10|0_77490248	chr2H	77490248	1	0	1	.	.	0
3267124a1	silicoDArT	3267124	2H	360.19	540	chr2H|HvDArTseq-3267124a1|Freq-10|0_78192530	chr2H	78192530	1	0	1	.	.	0
4197550a1	silicoDArT	4197550	2H	360.19	541	chr2H|HvDArTseq-4197550a1|Freq-10|0_78679299	chr2H	78679299	1	0	1	.	.	0
6437392a1	silicoDArT	6437392	2H	360.19	542	NA|HvDArTseq-6437392a1|Freq-10|6536_0	NA	0	0	1	0	.	.	0
3662399a1	silicoDArT	3662399	2H	360.19	543	NA|HvDArTseq-3662399a1|Freq-10|4093_0	NA	0	0	1	0	.	.	0
3664276a1	silicoDArT	3664276	2H	360.19	544	chr2H|HvDArTseq-3664276a1|Freq-10|0_79376648	chr2H	79376648	1	1	0	.	.	0
3930689a1	silicoDArT	3930689	2H	360.19	545	NA|HvDArTseq-3930689a1|Freq-10|7502_0	NA	0	0	1	0	.	.	0
3268323a1	silicoDArT	3268323	2H	360.19	546	chr1H|HvDArTseq-3268323a1|Freq-10|0_543217296	chr1H	543217296	2	0	1	.	.	0
3255313a1	SNP	3255313	2H	360.903	547	chr1H|HvDArTseq-3255313a1|Freq-10|0_96572024	chr1H	96572024	2	1	0	.	.	0
3259850a1	SNP	3259850	2H	361.714	548	chr2H|HvDArTseq-3259850a1|Freq-10|0_70641363	chr2H	70641363	1	1	0	.	.	0
3263498a1	silicoDArT	3263498	2H	361.714	549	chr2H|HvDArTseq-3263498a1|Freq-10|0_70640725	chr2H	70640725	1	1	0	.	.	0
3263268a1	silicoDArT	3263268	2H	361.714	550	chr2H|HvDArTseq-3263268a1|Freq-10|0_70640727	chr2H	70640727	1	0	1	.	.	0
3274301a1	silicoDArT	3274301	2H	361.714	551	chr2H|HvDArTseq-3274301a1|Freq-10|0_71173373	chr2H	71173373	1	0	1	.	.	0
3255915a1	silicoDArT	3255915	2H	361.714	552	chr2H|HvDArTseq-3255915a1|Freq-10|0_71173308	chr2H	71173308	1	0	1	.	.	0
5254515a1	silicoDArT	5254515	2H	361.714	553	NA|HvDArTseq-5254515a1|Freq-10|2979_0	NA	0	0	1	0	.	.	0
7585071a1	SNP	7585071	2H	362.499	554	NA|HvDArTseq-7585071a1|Freq-10|7954_0	NA	0	0	0	2	.	.	25
3264988a1	silicoDArT	3264988	2H	362.499	555	NA|HvDArTseq-3264988a1|Freq-10|8171_0	NA	0	0	1	0	.	.	0
5260883a1	SNP	5260883	2H	363.061	556	NA|HvDArTseq-5260883a1|Freq-10|5460_0	NA	0	0	0	2	.	.	0
3271636a1	silicoDArT	3271636	2H	364.499	557	NA|HvDArTseq-3271636a1|Freq-10|8145_0	NA	0	0	0	1	.	.	0
3812169a1	SNP	3812169	2H	365.919	558	chr2H|HvDArTseq-3812169a1|Freq-10|0_73938228	chr2H	73938228	2	2	0	.	.	3
3433536a1	silicoDArT	3433536	2H	366.48	559	chr2H|HvDArTseq-3433536a1|Freq-10|0_155158657	chr2H	155158657	2	1	0	.	.	0
5239603a1	silicoDArT	5239603	2H	366.48	560	chr2H|HvDArTseq-5239603a1|Freq-10|0_73995367	chr2H	73995367	1	1	0	.	.	0
5258906a1	silicoDArT	5258906	2H	366.48	561	NA|HvDArTseq-5258906a1|Freq-10|2293_0	NA	0	0	1	0	.	.	0
3911146a1	silicoDArT	3911146	2H	366.48	562	chr6H|HvDArTseq-3911146a1|Freq-10|0_118523352	chr6H	118523352	1	1	0	.	.	0
3397681a1	silicoDArT	3397681	2H	371.374	563	NA|HvDArTseq-3397681a1|Freq-10|2740_0	NA	0	0	1	0	.	.	0
6422809a1	SNP	6422809	2H	375.991	564	NA|HvDArTseq-6422809a1|Freq-10|2970_0	NA	0	0	0	1	.	.	2
3985693a1	SNP	3985693	2H	375.991	565	NA|HvDArTseq-3985693a1|Freq-10|2346_0	NA	0	0	2	1	.	.	0
3396262a1	silicoDArT	3396262	2H	375.991	566	chr2H|HvDArTseq-3396262a1|Freq-10|0_76531840	chr2H	76531840	1	0	1	.	.	0
3663746a1	silicoDArT	3663746	2H	375.991	567	NA|HvDArTseq-3663746a1|Freq-10|3154_0	NA	0	0	1	0	.	.	0
3271219a1	silicoDArT	3271219	2H	378.08	568	NA|HvDArTseq-3271219a1|Freq-10|8585_0	NA	0	0	1	0	.	.	0
5256184a1	silicoDArT	5256184	2H	381.014	569	chr2H|HvDArTseq-5256184a1|Freq-10|0_94049409	chr2H	94049409	1	1	0	.	.	0
5242786a1	silicoDArT	5242786	2H	383.013	570	NA|HvDArTseq-5242786a1|Freq-10|1566_0	NA	0	0	0	1	.	.	0
3266784a1	silicoDArT	3266784	2H	383.013	571	NA|HvDArTseq-3266784a1|Freq-10|9155_0	NA	0	0	0	1	.	.	0
4015386a1	silicoDArT	4015386	2H	383.013	572	NA|HvDArTseq-4015386a1|Freq-10|2530_0	NA	0	0	1	0	.	.	6
3986109a1	silicoDArT	3986109	2H	383.013	573	chr2H|HvDArTseq-3986109a1|Freq-10|0_93387219	chr2H	93387219	1	0	1	.	.	0
3985887a1	silicoDArT	3985887	2H	383.013	574	NA|HvDArTseq-3985887a1|Freq-10|9368_0	NA	0	0	1	0	.	.	0
4189774a1	silicoDArT	4189774	2H	383.013	575	chr2H|HvDArTseq-4189774a1|Freq-10|0_94765811	chr2H	94765811	1	1	0	.	.	0
5258259a1	silicoDArT	5258259	2H	383.013	576	NA|HvDArTseq-5258259a1|Freq-10|5151_0	NA	0	0	1	0	.	.	0
5251519a1	silicoDArT	5251519	2H	383.657	577	NA|HvDArTseq-5251519a1|Freq-10|359_0	NA	0	0	0	1	.	.	0
5241062a1	silicoDArT	5241062	2H	383.657	578	chr2H|HvDArTseq-5241062a1|Freq-10|0_90457799	chr2H	90457799	1	0	1	.	.	0
3433968a1	silicoDArT	3433968	2H	383.657	579	NA|HvDArTseq-3433968a1|Freq-10|8677_0	NA	0	0	0	1	.	.	0
4191760a1	silicoDArT	4191760	2H	383.657	580	chrUn|HvDArTseq-4191760a1|Freq-10|0_11814445	chrUn	11814445	1	0	1	.	.	0
3265431a1	silicoDArT	3265431	2H	383.657	581	chr2H|HvDArTseq-3265431a1|Freq-10|0_80842620	chr2H	80842620	1	0	1	.	.	0
3257223a1	SNP	3257223	2H	383.657	582	MM|HvDArTseq-3257223a1|Freq-10|238_0	MM	0	>2	1	0	.	.	0
3268592a1	SNP	3268592	2H	383.657	583	chr4H|HvDArTseq-3268592a1|Freq-10|0_346874649	chr4H	346874649	1	1	0	.	.	0
4187211a1	silicoDArT	4187211	2H	383.657	584	NA|HvDArTseq-4187211a1|Freq-10|2230_0	NA	0	0	0	1	.	.	0
5246164a1	silicoDArT	5246164	2H	383.657	585	chr2H|HvDArTseq-5246164a1|Freq-10|0_91068961	chr2H	91068961	1	0	1	.	.	0
3432636a1	SNP	3432636	2H	384.793	586	NA|HvDArTseq-3432636a1|Freq-10|4829_0	NA	0	0	2	0	.	.	6
3395844a1	silicoDArT	3395844	2H	390.547	587	NA|HvDArTseq-3395844a1|Freq-10|7764_0	NA	0	0	0	1	.	.	0
4011376a1	silicoDArT	4011376	2H	395.612	588	chr2H|HvDArTseq-4011376a1|Freq-10|0_97407645	chr2H	97407645	1	0	1	.	.	0
7241295a1	SNP	7241295	2H	395.612	589	NA|HvDArTseq-7241295a1|Freq-10|2904_0	NA	0	0	0	1	.	.	11
4015964a1	silicoDArT	4015964	2H	395.612	590	chr2H|HvDArTseq-4015964a1|Freq-10|0_100792766	chr2H	100792766	1	0	1	.	.	0
11334957a1	silicoDArT	11334957	2H	395.612	591	chr2H|HvDArTseq-11334957a1|Freq-10|0_98427690	chr2H	98427690	1	1	0	.	.	0
3263894a1	silicoDArT	3263894	2H	395.612	592	NA|HvDArTseq-3263894a1|Freq-10|10290_0	NA	0	0	0	1	.	.	0
3255675a1	silicoDArT	3255675	2H	396.864	593	chr2H|HvDArTseq-3255675a1|Freq-10|0_96411969	chr2H	96411969	1	1	0	.	.	0
3269908a1	silicoDArT	3269908	2H	396.864	594	chr2H|HvDArTseq-3269908a1|Freq-10|0_96411904	chr2H	96411904	1	1	0	.	.	0
3397129a1	silicoDArT	3397129	2H	397.887	595	NA|HvDArTseq-3397129a1|Freq-10|165_0	NA	0	0	1	0	.	.	0
5249910a1	silicoDArT	5249910	2H	397.887	596	chr2H|HvDArTseq-5249910a1|Freq-10|0_97407645	chr2H	97407645	1	1	0	.	.	1
6435649a1	silicoDArT	6435649	2H	398.938	597	chr2H|HvDArTseq-6435649a1|Freq-10|0_110955820	chr2H	110955820	1	1	0	.	.	0
13142399a1	silicoDArT	13142399	2H	398.938	598	chr7H|HvDArTseq-13142399a1|Freq-10|0_10612429	chr7H	10612429	1	1	0	.	.	0
4006806a1	SNP	4006806	2H	398.938	599	chr6H|HvDArTseq-4006806a1|Freq-10|0_304289074	chr6H	304289074	1	2	0	.	.	30
5254055a1	silicoDArT	5254055	2H	398.938	600	NA|HvDArTseq-5254055a1|Freq-10|8570_0	NA	0	0	1	0	.	.	0
3987472a1	silicoDArT	3987472	2H	399.642	601	NA|HvDArTseq-3987472a1|Freq-10|4511_0	NA	0	0	0	1	.	.	0
3255933a1	silicoDArT	3255933	2H	399.642	602	chr2H|HvDArTseq-3255933a1|Freq-10|0_114710719	chr2H	114710719	1	0	1	.	.	0
3396781a1	silicoDArT	3396781	2H	399.642	603	MM|HvDArTseq-3396781a1|Freq-10|108_0	MM	0	>2	0	1	.	.	0
3259124a1	silicoDArT	3259124	2H	399.642	604	chr2H|HvDArTseq-3259124a1|Freq-10|0_115721950	chr2H	115721950	1	1	0	.	.	0
3264219a1	silicoDArT	3264219	2H	399.642	605	chr2H|HvDArTseq-3264219a1|Freq-10|0_111504353	chr2H	111504353	1	0	-	.	B allele inferred (non-parental).	0
13142405a1	silicoDArT	13142405	2H	399.642	606	chr4H|HvDArTseq-13142405a1|Freq-10|0_294658636	chr4H	294658636	2	1	0	.	.	0
3259124a2	silicoDArT	3259124	2H	399.642	607	chr2H|HvDArTseq-3259124a2|Freq-10|0_115721950	chr2H	115721950	1	0	1	.	.	0
3264057a1	silicoDArT	3264057	2H	399.642	608	chr2H|HvDArTseq-3264057a1|Freq-10|0_114737421	chr2H	114737421	1	0	1	.	.	0
3987195a3	SNP	3987195	2H	399.642	609	chr5H|HvDArTseq-3987195a3|Freq-10|0_457997228	chr5H	457997228	1	1	2	.	.	0
3269615a1	silicoDArT	3269615	2H	399.642	610	chr2H|HvDArTseq-3269615a1|Freq-10|0_113481849	chr2H	113481849	1	0	1	.	.	8
5242336a1	silicoDArT	5242336	2H	399.642	611	chr2H|HvDArTseq-5242336a1|Freq-10|0_108759789	chr2H	108759789	1	0	1	.	.	0
3261907a1	silicoDArT	3261907	2H	399.642	612	chr2H|HvDArTseq-3261907a1|Freq-10|0_114201412	chr2H	114201412	1	0	1	.	.	0
3271215a1	silicoDArT	3271215	2H	399.642	613	chr2H|HvDArTseq-3271215a1|Freq-10|0_114486418	chr2H	114486418	1	0	1	.	.	0
3987258a1	silicoDArT	3987258	2H	399.642	614	NA|HvDArTseq-3987258a1|Freq-10|4104_0	NA	0	0	0	1	.	.	0
5255668a1	silicoDArT	5255668	2H	399.642	615	NA|HvDArTseq-5255668a1|Freq-10|7478_0	NA	0	0	0	1	.	.	0
4330642a1	silicoDArT	4330642	2H	399.642	616	NA|HvDArTseq-4330642a1|Freq-10|1332_0	NA	0	0	0	1	.	.	0
3255411a1	silicoDArT	3255411	2H	399.642	617	NA|HvDArTseq-3255411a1|Freq-10|350_0	NA	0	0	1	0	.	.	0
4793501a1	silicoDArT	4793501	2H	400.34	618	chr2H|HvDArTseq-4793501a1|Freq-10|0_112107480	chr2H	112107480	1	0	1	.	.	0
5250195a1	silicoDArT	5250195	2H	400.34	619	NA|HvDArTseq-5250195a1|Freq-10|7423_0	NA	0	0	0	1	.	.	0
3267949a1	silicoDArT	3267949	2H	400.34	620	NA|HvDArTseq-3267949a1|Freq-10|4340_0	NA	0	0	0	1	.	.	0
3273906a1	silicoDArT	3273906	2H	400.34	621	NA|HvDArTseq-3273906a1|Freq-10|7098_0	NA	0	0	0	1	.	.	0
3270869a1	silicoDArT	3270869	2H	401.563	622	NA|HvDArTseq-3270869a1|Freq-10|7467_0	NA	0	0	0	1	.	.	0
3256247a1	SNP	3256247	2H	401.563	623	chr2H|HvDArTseq-3256247a1|Freq-10|0_120720504	chr2H	120720504	1	1	0	distorted	.	0
4191149a2	SNP	4191149	2H	401.563	624	chr2H|HvDArTseq-4191149a2|Freq-10|0_115724200	chr2H	115724200	1	1	0	.	.	7
4000104a1	silicoDArT	4000104	2H	401.563	625	chr2H|HvDArTseq-4000104a1|Freq-10|0_115740389	chr2H	115740389	1	0	1	.	.	1
5254924a1	silicoDArT	5254924	2H	401.563	626	chr2H|HvDArTseq-5254924a1|Freq-10|0_120567197	chr2H	120567197	1	1	0	.	.	0
3664958a1	silicoDArT	3664958	2H	405.65	627	chr2H|HvDArTseq-3664958a1|Freq-10|0_121684945	chr2H	121684945	1	0	1	distorted	.	0
5240421a2	SNP	5240421	2H	410.309	628	NA|HvDArTseq-5240421a2|Freq-10|717_0	NA	0	0	1	2	.	.	0
3259457a1	silicoDArT	3259457	2H	410.898	629	chr2H|HvDArTseq-3259457a1|Freq-10|0_166772760	chr2H	166772760	1	0	1	.	.	0
3266207a1	silicoDArT	3266207	2H	410.898	630	MM|HvDArTseq-3266207a1|Freq-10|156_0	MM	0	>2	0	1	.	.	0
3915085a1	silicoDArT	3915085	2H	410.898	631	NA|HvDArTseq-3915085a1|Freq-10|4202_0	NA	0	0	0	1	.	.	0
5244545a1	silicoDArT	5244545	2H	410.898	632	chr2H|HvDArTseq-5244545a1|Freq-10|0_160426598	chr2H	160426598	1	0	1	.	.	0
3663754a1	silicoDArT	3663754	2H	410.898	633	NA|HvDArTseq-3663754a1|Freq-10|10524_0	NA	0	0	0	1	.	.	0
4793198a1	silicoDArT	4793198	2H	410.898	634	NA|HvDArTseq-4793198a1|Freq-10|7555_0	NA	0	0	0	1	.	.	0
3398446a1	silicoDArT	3398446	2H	410.898	635	chr2H|HvDArTseq-3398446a1|Freq-10|0_132250775	chr2H	132250775	1	0	1	.	.	0
3265492a1	silicoDArT	3265492	2H	410.898	636	NA|HvDArTseq-3265492a1|Freq-10|8344_0	NA	0	0	0	1	.	.	0
3261714a1	SNP	3261714	2H	410.898	637	chr2H|HvDArTseq-3261714a1|Freq-10|0_144228442	chr2H	144228442	1	0	1	.	.	4
3432661a1	SNP	3432661	2H	410.898	638	NA|HvDArTseq-3432661a1|Freq-10|5322_0	NA	0	0	1	0	.	.	0
4790641a1	silicoDArT	4790641	2H	410.898	639	chr2H|HvDArTseq-4790641a1|Freq-10|0_166660232	chr2H	166660232	1	0	1	.	.	0
4415390a1	silicoDArT	4415390	2H	410.898	640	chr2H|HvDArTseq-4415390a1|Freq-10|0_132417642	chr2H	132417642	1	0	1	.	.	0
4006677a1	silicoDArT	4006677	2H	410.898	641	NA|HvDArTseq-4006677a1|Freq-10|10570_0	NA	0	0	0	1	.	.	0
5240421a1	silicoDArT	5240421	2H	410.898	642	NA|HvDArTseq-5240421a1|Freq-10|4674_0	NA	0	0	0	1	.	.	0
4006618a1	silicoDArT	4006618	2H	410.898	643	NA|HvDArTseq-4006618a1|Freq-10|8999_0	NA	0	0	0	1	.	.	0
5247005a1	silicoDArT	5247005	2H	410.898	644	NA|HvDArTseq-5247005a1|Freq-10|6400_0	NA	0	0	0	1	.	.	0
3433313a1	silicoDArT	3433313	2H	410.898	645	chr2H|HvDArTseq-3433313a1|Freq-10|0_160426598	chr2H	160426598	1	1	0	.	.	0
4016383a1	silicoDArT	4016383	2H	410.898	646	NA|HvDArTseq-4016383a1|Freq-10|7501_0	NA	0	0	1	0	.	.	0
3397455a1	silicoDArT	3397455	2H	410.898	647	chr2H|HvDArTseq-3397455a1|Freq-10|0_155356502	chr2H	155356502	1	0	1	.	.	0
3260893a1	SNP	3260893	2H	411.576	648	NA|HvDArTseq-3260893a1|Freq-10|1323_0	NA	0	0	-	1	.	A allele inferred (non-parental).	0
3666402a1	silicoDArT	3666402	2H	413.207	649	NA|HvDArTseq-3666402a1|Freq-10|9777_0	NA	0	0	1	0	.	.	0
3433565a1	silicoDArT	3433565	2H	416.785	650	chr2H|HvDArTseq-3433565a1|Freq-10|0_176967786	chr2H	176967786	1	1	0	.	.	0
3923869a1	SNP	3923869	2H	419.112	651	chr2H|HvDArTseq-3923869a1|Freq-10|0_132417429	chr2H	132417429	1	2	0	.	.	3
3932608a1	silicoDArT	3932608	2H	420.713	652	chr2H|HvDArTseq-3932608a1|Freq-10|0_492501780	chr2H	492501780	1	1	0	.	.	0
3912632a1	SNP	3912632	2H	420.713	653	NA|HvDArTseq-3912632a1|Freq-10|3497_0	NA	0	0	2	0	.	.	2
3664226a1	silicoDArT	3664226	2H	423.415	654	chr2H|HvDArTseq-3664226a1|Freq-10|0_525478493	chr2H	525478493	1	1	0	.	.	0
7747657a1	silicoDArT	7747657	2H	424.448	655	NA|HvDArTseq-7747657a1|Freq-10|2601_0	NA	0	0	1	0	.	.	0
3275477a1	silicoDArT	3275477	2H	425.018	656	NA|HvDArTseq-3275477a1|Freq-10|5610_0	NA	0	0	1	0	.	.	0
6284061a1	SNP	6284061	2H	425.018	657	chr5H|HvDArTseq-6284061a1|Freq-10|0_615593924	chr5H	615593924	1	2	0	.	.	54
3271337a1	silicoDArT	3271337	2H	426.674	658	NA|HvDArTseq-3271337a1|Freq-10|3343_0	NA	0	0	1	0	.	.	0
4330676a1	silicoDArT	4330676	2H	431.654	659	NA|HvDArTseq-4330676a1|Freq-10|3294_0	NA	0	0	1	0	.	.	0
3266568a1	silicoDArT	3266568	2H	437.937	660	NA|HvDArTseq-3266568a1|Freq-10|3149_0	NA	0	0	1	0	.	.	0
3397475a1	silicoDArT	3397475	2H	440.299	661	NA|HvDArTseq-3397475a1|Freq-10|9370_0	NA	0	0	1	0	.	.	0
13142403a1	silicoDArT	13142403	2H	443.292	662	chr2H|HvDArTseq-13142403a1|Freq-10|0_413697679	chr2H	413697679	1	1	0	.	.	0
6436737a1	silicoDArT	6436737	2H	445.686	663	chr2H|HvDArTseq-6436737a1|Freq-10|0_308479074	chr2H	308479074	1	1	0	.	.	0
6437544a1	silicoDArT	6437544	2H	455.875	664	chr2H|HvDArTseq-6437544a1|Freq-10|0_450809325	chr2H	450809325	2	1	-	.	B allele inferred (non-parental).	0
4191557a1	silicoDArT	4191557	2H	464.467	665	chr2H|HvDArTseq-4191557a1|Freq-10|0_404619835	chr2H	404619835	1	1	0	.	.	0
7240926a1	SNP	7240926	2H	465.604	666	NA|HvDArTseq-7240926a1|Freq-10|86_0	NA	0	0	2	0	.	.	0
3664780a1	silicoDArT	3664780	2H	466.843	667	NA|HvDArTseq-3664780a1|Freq-10|7662_0	NA	0	0	1	0	.	.	0
8600314a1	silicoDArT	8600314	2H	468.032	668	chr2H|HvDArTseq-8600314a1|Freq-10|0_481283096	chr2H	481283096	1	1	0	.	.	0
4790606a1	silicoDArT	4790606	2H	468.032	669	NA|HvDArTseq-4790606a1|Freq-10|10463_0	NA	0	0	1	0	.	.	0
3918825a1	silicoDArT	3918825	2H	468.928	670	chr2H|HvDArTseq-3918825a1|Freq-10|0_441097503	chr2H	441097503	1	0	1	.	.	0
3269851a1	silicoDArT	3269851	2H	468.928	671	NA|HvDArTseq-3269851a1|Freq-10|5849_0	NA	0	0	0	1	.	.	0
3268826a1	silicoDArT	3268826	2H	468.928	672	chr2H|HvDArTseq-3268826a1|Freq-10|0_517908179	chr2H	517908179	1	1	0	.	.	0
3266351a1	silicoDArT	3266351	2H	470.08	673	chr2H|HvDArTseq-3266351a1|Freq-10|0_227746299	chr2H	227746299	1	0	1	.	.	0
3986909a1	silicoDArT	3986909	2H	470.08	674	chr2H|HvDArTseq-3986909a1|Freq-10|0_470985011	chr2H	470985011	1	0	1	.	.	0
5246643a1	silicoDArT	5246643	2H	470.659	675	chr2H|HvDArTseq-5246643a1|Freq-10|0_453711423	chr2H	453711423	1	0	1	.	.	0
13142351a1	silicoDArT	13142351	2H	471.236	676	NA|HvDArTseq-13142351a1|Freq-10|5384_0	NA	0	0	0	1	.	.	0
7575990a1	silicoDArT	7575990	2H	471.236	677	NA|HvDArTseq-7575990a1|Freq-10|5367_0	NA	0	0	0	1	.	.	0
5253714a1	silicoDArT	5253714	2H	471.236	678	NA|HvDArTseq-5253714a1|Freq-10|1815_0	NA	0	0	0	1	.	.	0
4016179a1	silicoDArT	4016179	2H	471.934	679	chr2H|HvDArTseq-4016179a1|Freq-10|0_226457296	chr2H	226457296	1	0	1	.	.	0
7216889a1	silicoDArT	7216889	2H	474.117	680	NA|HvDArTseq-7216889a1|Freq-10|3372_0	NA	0	0	0	1	.	.	0
4793170a1	silicoDArT	4793170	2H	477.695	681	NA|HvDArTseq-4793170a1|Freq-10|4374_0	NA	0	0	0	1	.	.	0
3270837a1	silicoDArT	3270837	2H	480.046	682	chr2H|HvDArTseq-3270837a1|Freq-10|0_492501779	chr2H	492501779	1	0	1	.	.	0
3919937a1	SNP	3919937	2H	481.794	683	chr1H|HvDArTseq-3919937a1|Freq-10|0_273234179	chr1H	273234179	1	0	2	.	.	0
3261555a1	silicoDArT	3261555	2H	484.797	684	chr2H|HvDArTseq-3261555a1|Freq-10|0_492747980	chr2H	492747980	1	0	1	.	.	0
13142566a1	silicoDArT	13142566	2H	486.46	685	NA|HvDArTseq-13142566a1|Freq-10|3027_0	NA	0	0	0	1	.	.	0
4015857a1	silicoDArT	4015857	2H	488.418	686	chr2H|HvDArTseq-4015857a1|Freq-10|0_520773543	chr2H	520773543	1	0	1	.	.	0
3662111a1	silicoDArT	3662111	2H	489.315	687	chr2H|HvDArTseq-3662111a1|Freq-10|0_440641150	chr2H	440641150	1	0	1	.	.	0
3266499a1	silicoDArT	3266499	2H	490.724	688	chr2H|HvDArTseq-3266499a1|Freq-10|0_399588072	chr2H	399588072	1	1	0	.	.	0
3396749a1	silicoDArT	3396749	2H	491.819	689	NA|HvDArTseq-3396749a1|Freq-10|4900_0	NA	0	0	1	0	.	.	0
3915648a1	silicoDArT	3915648	2H	491.819	690	chr2H|HvDArTseq-3915648a1|Freq-10|0_221978575	chr2H	221978575	1	1	0	.	.	0
4000291a1	silicoDArT	4000291	2H	491.819	691	chr2H|HvDArTseq-4000291a1|Freq-10|0_420457736	chr2H	420457736	1	1	0	.	.	0
3985680a1	silicoDArT	3985680	2H	491.819	692	chr2H|HvDArTseq-3985680a1|Freq-10|0_265049403	chr2H	265049403	1	1	0	.	.	0
4186771a1	silicoDArT	4186771	2H	491.819	693	chr2H|HvDArTseq-4186771a1|Freq-10|0_363905543	chr2H	363905543	1	1	0	.	.	0
4782901a1	SNP	4782901	2H	491.819	694	NA|HvDArTseq-4782901a1|Freq-10|8709_0	NA	0	0	1	0	.	.	0
6436775a1	silicoDArT	6436775	2H	491.819	695	chr2H|HvDArTseq-6436775a1|Freq-10|0_258600608	chr2H	258600608	1	1	0	.	.	0
6435229a1	silicoDArT	6435229	2H	491.819	696	chr2H|HvDArTseq-6435229a1|Freq-10|0_425027827	chr2H	425027827	1	1	0	.	.	0
5254088a1	silicoDArT	5254088	2H	491.819	697	NA|HvDArTseq-5254088a1|Freq-10|2643_0	NA	0	0	1	0	.	.	0
5254942a1	silicoDArT	5254942	2H	491.819	698	chr2H|HvDArTseq-5254942a1|Freq-10|0_234394423	chr2H	234394423	1	1	0	.	.	0
3929841a1	silicoDArT	3929841	2H	491.819	699	MM|HvDArTseq-3929841a1|Freq-10|210_0	MM	0	>2	1	0	.	.	0
3987167a1	silicoDArT	3987167	2H	491.819	700	chr2H|HvDArTseq-3987167a1|Freq-10|0_298733622	chr2H	298733622	1	0	1	.	.	0
5241300a1	silicoDArT	5241300	2H	491.819	701	NA|HvDArTseq-5241300a1|Freq-10|2658_0	NA	0	0	1	0	.	.	2
3810727a1	silicoDArT	3810727	2H	491.819	702	chr2H|HvDArTseq-3810727a1|Freq-10|0_277305577	chr2H	277305577	1	1	0	.	.	0
3266765a1	silicoDArT	3266765	2H	491.819	703	chr2H|HvDArTseq-3266765a1|Freq-10|0_184805039	chr2H	184805039	1	1	0	.	.	0
3266677a1	silicoDArT	3266677	2H	491.819	704	chr2H|HvDArTseq-3266677a1|Freq-10|0_243990942	chr2H	243990942	1	1	0	.	.	0
3269006a1	silicoDArT	3269006	2H	491.819	705	chr2H|HvDArTseq-3269006a1|Freq-10|0_363905186	chr2H	363905186	1	1	0	.	.	0
3273002a1	silicoDArT	3273002	2H	491.819	706	chr2H|HvDArTseq-3273002a1|Freq-10|0_308784588	chr2H	308784588	1	1	0	.	.	0
3273440a1	silicoDArT	3273440	2H	491.819	707	chr2H|HvDArTseq-3273440a1|Freq-10|0_420477924	chr2H	420477924	1	-	0	.	A allele inferred (non-parental).	0
3927870a1	silicoDArT	3927870	2H	491.819	708	chr2H|HvDArTseq-3927870a1|Freq-10|0_422259955	chr2H	422259955	1	1	0	.	.	11
3273579a1	silicoDArT	3273579	2H	491.819	709	chr2H|HvDArTseq-3273579a1|Freq-10|0_259053802	chr2H	259053802	2	1	0	.	.	3
6435825a1	silicoDArT	6435825	2H	491.819	710	chr6H|HvDArTseq-6435825a1|Freq-10|0_228215236	chr6H	228215236	1	1	0	.	.	2
5243496a1	silicoDArT	5243496	2H	491.819	711	chr2H|HvDArTseq-5243496a1|Freq-10|0_369326783	chr2H	369326783	1	1	0	.	.	0
5240735a1	silicoDArT	5240735	2H	491.819	712	chr2H|HvDArTseq-5240735a1|Freq-10|0_166772760	chr2H	166772760	1	1	0	.	.	0
5239996a1	silicoDArT	5239996	2H	491.819	713	NA|HvDArTseq-5239996a1|Freq-10|8699_0	NA	0	0	1	0	.	.	0
4784554a1	silicoDArT	4784554	2H	491.819	714	chr2H|HvDArTseq-4784554a1|Freq-10|0_348179295	chr2H	348179295	1	1	0	.	.	0
3264099a1	silicoDArT	3264099	2H	491.819	715	chr2H|HvDArTseq-3264099a1|Freq-10|0_235325942	chr2H	235325942	1	1	0	.	.	0
3985390a1	silicoDArT	3985390	2H	491.819	716	chr2H|HvDArTseq-3985390a1|Freq-10|0_369326718	chr2H	369326718	1	1	0	.	.	0
4185519a1	silicoDArT	4185519	2H	491.819	717	NA|HvDArTseq-4185519a1|Freq-10|1995_0	NA	0	0	1	0	.	.	0
3264191a1	silicoDArT	3264191	2H	491.819	718	chr2H|HvDArTseq-3264191a1|Freq-10|0_184316412	chr2H	184316412	1	1	0	.	.	0
3664758a1	silicoDArT	3664758	2H	491.819	719	chr2H|HvDArTseq-3664758a1|Freq-10|0_251223650	chr2H	251223650	1	1	0	.	.	0
6435892a1	silicoDArT	6435892	2H	492.961	720	chr2H|HvDArTseq-6435892a1|Freq-10|0_240674196	chr2H	240674196	1	1	0	.	.	0
3921214a1	silicoDArT	3921214	2H	492.961	721	NA|HvDArTseq-3921214a1|Freq-10|7665_0	NA	0	0	1	0	.	.	1
7734808a1	silicoDArT	7734808	2H	493.927	722	NA|HvDArTseq-7734808a1|Freq-10|4208_0	NA	0	0	1	0	.	.	0
3923079a1	silicoDArT	3923079	2H	496.606	723	chr2H|HvDArTseq-3923079a1|Freq-10|0_201152116	chr2H	201152116	1	1	0	.	.	0
3255096a1	silicoDArT	3255096	2H	499.574	724	chr2H|HvDArTseq-3255096a1|Freq-10|0_132651710	chr2H	132651710	1	1	-	distorted	B allele inferred (non-parental).	0
5245023a1	silicoDArT	5245023	2H	500.732	725	chr2H|HvDArTseq-5245023a1|Freq-10|0_128357466	chr2H	128357466	1	0	1	.	.	0
3396767a1	silicoDArT	3396767	2H	501.872	726	NA|HvDArTseq-3396767a1|Freq-10|7959_0	NA	0	0	0	1	.	.	0
3270177a1	silicoDArT	3270177	2H	502.917	727	NA|HvDArTseq-3270177a1|Freq-10|4465_0	NA	0	0	0	1	.	.	0
3433263a1	silicoDArT	3433263	2H	502.917	728	chr2H|HvDArTseq-3433263a1|Freq-10|0_132265063	chr2H	132265063	1	1	0	.	.	0
3273219a1	silicoDArT	3273219	2H	502.917	729	chr2H|HvDArTseq-3273219a1|Freq-10|0_132961079	chr2H	132961079	1	1	0	.	.	35
3256060a1	SNP	3256060	2H	502.917	730	chr2H|HvDArTseq-3256060a1|Freq-10|0_175075804	chr2H	175075804	1	1	0	distorted	.	0
3397230a1	silicoDArT	3397230	2H	502.917	731	NA|HvDArTseq-3397230a1|Freq-10|10129_0	NA	0	0	1	0	.	.	0
7582290a1	silicoDArT	7582290	2H	502.917	732	NA|HvDArTseq-7582290a1|Freq-10|3599_0	NA	0	0	1	0	.	.	0
3255535a1	silicoDArT	3255535	2H	502.917	733	chr2H|HvDArTseq-3255535a1|Freq-10|0_181833051	chr2H	181833051	1	1	0	.	.	0
3270834a1	silicoDArT	3270834	2H	502.917	734	chr2H|HvDArTseq-3270834a1|Freq-10|0_211134831	chr2H	211134831	1	1	0	.	.	0
8600262a1	silicoDArT	8600262	2H	502.917	735	NA|HvDArTseq-8600262a1|Freq-10|6117_0	NA	0	0	1	0	.	.	0
3267783a1	silicoDArT	3267783	2H	502.917	736	NA|HvDArTseq-3267783a1|Freq-10|8913_0	NA	0	0	1	0	.	.	0
3433556a1	silicoDArT	3433556	2H	502.917	737	chr1H|HvDArTseq-3433556a1|Freq-10|0_209842964	chr1H	209842964	1	1	0	.	.	0
3664099a1	silicoDArT	3664099	2H	502.917	738	NA|HvDArTseq-3664099a1|Freq-10|4875_0	NA	0	0	1	0	.	.	0
3999833a1	silicoDArT	3999833	2H	502.917	739	chr2H|HvDArTseq-3999833a1|Freq-10|0_138887272	chr2H	138887272	1	1	0	.	.	0
4190429a1	silicoDArT	4190429	2H	502.917	740	NA|HvDArTseq-4190429a1|Freq-10|9578_0	NA	0	0	1	0	.	.	1
6435711a1	silicoDArT	6435711	2H	502.917	741	NA|HvDArTseq-6435711a1|Freq-10|6478_0	NA	0	0	1	0	.	.	0
3273569a1	silicoDArT	3273569	2H	502.917	742	NA|HvDArTseq-3273569a1|Freq-10|8197_0	NA	0	0	1	0	.	.	0
3269641a1	silicoDArT	3269641	2H	502.917	743	chr2H|HvDArTseq-3269641a1|Freq-10|0_143608309	chr2H	143608309	1	0	1	.	.	0
3396279a1	silicoDArT	3396279	2H	502.917	744	chr2H|HvDArTseq-3396279a1|Freq-10|0_144051182	chr2H	144051182	1	1	0	.	.	0
5255727a1	silicoDArT	5255727	2H	502.917	745	NA|HvDArTseq-5255727a1|Freq-10|9354_0	NA	0	0	1	0	.	.	0
6435490a1	silicoDArT	6435490	2H	502.917	746	NA|HvDArTseq-6435490a1|Freq-10|10538_0	NA	0	0	1	0	.	.	0
6435568a1	silicoDArT	6435568	2H	502.917	747	chrUn|HvDArTseq-6435568a1|Freq-10|0_12127832	chrUn	12127832	1	1	0	.	.	0
5247628a1	silicoDArT	5247628	2H	502.917	748	NA|HvDArTseq-5247628a1|Freq-10|347_0	NA	0	0	1	-	.	B allele inferred (non-parental).	0
13142411a1	silicoDArT	13142411	2H	502.917	749	NA|HvDArTseq-13142411a1|Freq-10|6545_0	NA	0	0	1	0	.	.	0
5248378a1	silicoDArT	5248378	2H	502.917	750	NA|HvDArTseq-5248378a1|Freq-10|10239_0	NA	0	0	1	0	.	.	0
4006491a1	silicoDArT	4006491	2H	502.917	751	chr2H|HvDArTseq-4006491a1|Freq-10|0_211134896	chr2H	211134896	1	1	0	.	.	0
3261579a1	silicoDArT	3261579	2H	504.038	752	chr2H|HvDArTseq-3261579a1|Freq-10|0_198409222	chr2H	198409222	1	1	0	.	.	0
7719655a1	silicoDArT	7719655	2H	509.52	753	NA|HvDArTseq-7719655a1|Freq-10|9071_0	NA	0	0	1	0	.	.	0
3432983a1	silicoDArT	3432983	2H	515.099	754	chr2H|HvDArTseq-3432983a1|Freq-10|0_192011591	chr2H	192011591	1	0	1	.	.	0
3254904a1	silicoDArT	3254904	2H	515.67	755	chr2H|HvDArTseq-3254904a1|Freq-10|0_203257757	chr2H	203257757	1	0	1	.	.	0
5242990a1	silicoDArT	5242990	2H	515.67	756	chr2H|HvDArTseq-5242990a1|Freq-10|0_198409222	chr2H	198409222	1	0	1	.	.	0
3398202a2	SNP	3398202	2H	515.67	757	NA|HvDArTseq-3398202a2|Freq-10|8236_0	NA	0	0	0	2	.	.	33
3266553a1	silicoDArT	3266553	2H	515.67	758	chr2H|HvDArTseq-3266553a1|Freq-10|0_195770596	chr2H	195770596	1	1	0	.	.	0
4016508a1	SNP	4016508	2H	515.67	759	chr2H|HvDArTseq-4016508a1|Freq-10|0_172298394	chr2H	172298394	1	1	0	.	.	0
3812218a2	SNP	3812218	2H	516.825	760	chr2H|HvDArTseq-3812218a2|Freq-10|0_209183750	chr2H	209183750	1	1	2	.	.	0
3664025a1	silicoDArT	3664025	2H	518.559	761	NA|HvDArTseq-3664025a1|Freq-10|913_0	NA	0	0	1	0	.	.	0
3664040a1	silicoDArT	3664040	2H	519.847	762	chr2H|HvDArTseq-3664040a1|Freq-10|0_423751971	chr2H	423751971	1	0	1	.	.	0
3269705a1	silicoDArT	3269705	2H	520.637	763	chr2H|HvDArTseq-3269705a1|Freq-10|0_333755752	chr2H	333755752	1	0	1	.	.	0
3266640a1	silicoDArT	3266640	2H	520.637	764	chr2H|HvDArTseq-3266640a1|Freq-10|0_396011288	chr2H	396011288	1	0	1	.	.	0
3267829a1	silicoDArT	3267829	2H	520.637	765	chr2H|HvDArTseq-3267829a1|Freq-10|0_225883925	chr2H	225883925	1	0	1	.	.	0
5252525a1	silicoDArT	5252525	2H	520.637	766	chr2H|HvDArTseq-5252525a1|Freq-10|0_253207571	chr2H	253207571	1	0	1	.	.	0
3265114a1	silicoDArT	3265114	2H	520.637	767	NA|HvDArTseq-3265114a1|Freq-10|4606_0	NA	0	0	0	1	.	.	0
3664221a1	silicoDArT	3664221	2H	520.637	768	NA|HvDArTseq-3664221a1|Freq-10|2172_0	NA	0	0	0	1	.	.	0
5244032a1	silicoDArT	5244032	2H	520.637	769	NA|HvDArTseq-5244032a1|Freq-10|8902_0	NA	0	0	0	1	.	.	0
3269293a1	silicoDArT	3269293	2H	520.637	770	chr2H|HvDArTseq-3269293a1|Freq-10|0_232318869	chr2H	232318869	1	0	1	.	.	0
3261395a1	SNP	3261395	2H	520.637	771	chr2H|HvDArTseq-3261395a1|Freq-10|0_429692077	chr2H	429692077	1	0	1	distorted	.	0
3272515a1	silicoDArT	3272515	2H	520.637	772	MM|HvDArTseq-3272515a1|Freq-10|203_0	MM	0	>2	0	1	.	.	0
3273682a1	silicoDArT	3273682	2H	520.637	773	NA|HvDArTseq-3273682a1|Freq-10|8604_0	NA	0	0	0	1	.	.	0
3273683a1	silicoDArT	3273683	2H	520.637	774	NA|HvDArTseq-3273683a1|Freq-10|4077_0	NA	0	0	0	1	.	.	0
3263674a1	silicoDArT	3263674	2H	520.637	775	NA|HvDArTseq-3263674a1|Freq-10|4676_0	NA	0	0	0	1	.	.	0
3266245a1	silicoDArT	3266245	2H	520.637	776	chr2H|HvDArTseq-3266245a1|Freq-10|0_184805039	chr2H	184805039	1	0	1	.	.	0
3274212a1	silicoDArT	3274212	2H	520.637	777	chr2H|HvDArTseq-3274212a1|Freq-10|0_313336446	chr2H	313336446	1	0	1	.	.	0
3276181a1	silicoDArT	3276181	2H	520.637	778	NA|HvDArTseq-3276181a1|Freq-10|4651_0	NA	0	0	0	1	.	.	0
4000111a1	silicoDArT	4000111	2H	520.637	779	chr2H|HvDArTseq-4000111a1|Freq-10|0_253207311	chr2H	253207311	1	0	1	.	.	0
4195682a1	silicoDArT	4195682	2H	520.637	780	chr2H|HvDArTseq-4195682a1|Freq-10|0_308784523	chr2H	308784523	1	1	0	.	.	4
3270746a1	silicoDArT	3270746	2H	520.637	781	chr2H|HvDArTseq-3270746a1|Freq-10|0_313336766	chr2H	313336766	1	0	1	.	.	0
3271083a1	silicoDArT	3271083	2H	520.637	782	chr2H|HvDArTseq-3271083a1|Freq-10|0_253202421	chr2H	253202421	1	0	1	.	.	0
3986226a1	silicoDArT	3986226	2H	520.637	783	NA|HvDArTseq-3986226a1|Freq-10|2941_0	NA	0	0	0	1	.	.	0
3397435a1	silicoDArT	3397435	2H	520.637	784	NA|HvDArTseq-3397435a1|Freq-10|1282_0	NA	0	0	0	1	.	.	0
3269094a1	silicoDArT	3269094	2H	520.637	785	NA|HvDArTseq-3269094a1|Freq-10|10269_0	NA	0	0	0	1	.	.	0
3664567a1	silicoDArT	3664567	2H	520.637	786	NA|HvDArTseq-3664567a1|Freq-10|4741_0	NA	0	0	0	1	.	.	0
4187785a1	silicoDArT	4187785	2H	520.637	787	chr2H|HvDArTseq-4187785a1|Freq-10|0_313336511	chr2H	313336511	1	0	1	.	.	0
5241714a1	silicoDArT	5241714	2H	520.637	788	NA|HvDArTseq-5241714a1|Freq-10|8332_0	NA	0	0	0	1	.	.	0
5248885a1	silicoDArT	5248885	2H	520.637	789	chr2H|HvDArTseq-5248885a1|Freq-10|0_253207727	chr2H	253207727	1	0	1	.	.	0
3931404a1	silicoDArT	3931404	2H	520.637	790	chr2H|HvDArTseq-3931404a1|Freq-10|0_338842528	chr2H	338842528	1	0	1	.	.	0
3263611a2	SNP	3263611	2H	520.637	791	chr2H|HvDArTseq-3263611a2|Freq-10|0_492567232	chr2H	492567232	1	1	2	.	.	97
3912744a1	silicoDArT	3912744	2H	520.637	792	chr2H|HvDArTseq-3912744a1|Freq-10|0_376016525	chr2H	376016525	2	0	1	.	.	0
4012422a1	silicoDArT	4012422	2H	520.637	793	chr2H|HvDArTseq-4012422a1|Freq-10|0_492496902	chr2H	492496902	1	0	-	.	B allele inferred (non-parental).	0
3258015a1	silicoDArT	3258015	2H	520.637	794	chr2H|HvDArTseq-3258015a1|Freq-10|0_234394423	chr2H	234394423	1	0	1	.	.	0
3263591a1	silicoDArT	3263591	2H	520.637	795	chr2H|HvDArTseq-3263591a1|Freq-10|0_221978575	chr2H	221978575	1	0	1	.	.	0
3264449a1	silicoDArT	3264449	2H	520.637	796	NA|HvDArTseq-3264449a1|Freq-10|7448_0	NA	0	0	0	1	.	.	0
3916786a1	silicoDArT	3916786	2H	520.637	797	chr2H|HvDArTseq-3916786a1|Freq-10|0_492567232	chr2H	492567232	1	0	1	.	.	0
5257545a1	silicoDArT	5257545	2H	520.637	798	chr2H|HvDArTseq-5257545a1|Freq-10|0_235007896	chr2H	235007896	1	1	0	.	.	0
6269685a1	silicoDArT	6269685	2H	520.637	799	chr2H|HvDArTseq-6269685a1|Freq-10|0_483063202	chr2H	483063202	1	0	1	.	.	0
6277471a1	silicoDArT	6277471	2H	520.637	800	chr2H|HvDArTseq-6277471a1|Freq-10|0_260810947	chr2H	260810947	1	0	1	.	.	0
3263845a1	silicoDArT	3263845	2H	520.637	801	chr2H|HvDArTseq-3263845a1|Freq-10|0_469047529	chr2H	469047529	1	0	1	.	.	0
3272599a1	silicoDArT	3272599	2H	520.637	802	chr2H|HvDArTseq-3272599a1|Freq-10|0_468042413	chr2H	468042413	1	0	1	.	.	0
3664737a1	silicoDArT	3664737	2H	520.637	803	NA|HvDArTseq-3664737a1|Freq-10|6609_0	NA	0	0	0	1	.	.	0
4016179a2	SNP	4016179	2H	520.637	804	chr2H|HvDArTseq-4016179a2|Freq-10|0_226457296	chr2H	226457296	1	1	0	.	.	0
4184545a1	silicoDArT	4184545	2H	520.637	805	NA|HvDArTseq-4184545a1|Freq-10|6743_0	NA	0	0	0	1	.	.	0
4188763a1	silicoDArT	4188763	2H	522.009	806	NA|HvDArTseq-4188763a1|Freq-10|8015_0	NA	0	0	0	1	.	.	0
3398137a1	silicoDArT	3398137	2H	523.575	807	chr2H|HvDArTseq-3398137a1|Freq-10|0_530594146	chr2H	530594146	1	0	1	.	.	0
3266859a1	silicoDArT	3266859	2H	523.575	808	chr2H|HvDArTseq-3266859a1|Freq-10|0_535496023	chr2H	535496023	1	0	1	.	.	8
3264194a1	silicoDArT	3264194	2H	523.575	809	chr2H|HvDArTseq-3264194a1|Freq-10|0_525398856	chr2H	525398856	1	0	1	.	.	0
3268820a1	silicoDArT	3268820	2H	523.575	810	NA|HvDArTseq-3268820a1|Freq-10|6416_0	NA	0	0	1	0	.	.	0
5243118a1	silicoDArT	5243118	2H	523.575	811	NA|HvDArTseq-5243118a1|Freq-10|6480_0	NA	0	0	0	1	.	.	0
4006780a1	silicoDArT	4006780	2H	523.575	812	chr2H|HvDArTseq-4006780a1|Freq-10|0_534577048	chr2H	534577048	1	0	1	.	.	0
3396447a1	silicoDArT	3396447	2H	523.575	813	NA|HvDArTseq-3396447a1|Freq-10|5648_0	NA	0	0	0	1	.	.	6
3396878a1	silicoDArT	3396878	2H	523.575	814	NA|HvDArTseq-3396878a1|Freq-10|3839_0	NA	0	0	0	1	.	.	0
3270921a1	silicoDArT	3270921	2H	523.575	815	chr2H|HvDArTseq-3270921a1|Freq-10|0_534576983	chr2H	534576983	1	0	1	.	.	0
3985995a1	silicoDArT	3985995	2H	523.575	816	chr2H|HvDArTseq-3985995a1|Freq-10|0_525245858	chr2H	525245858	1	0	1	.	.	3
3272675a1	silicoDArT	3272675	2H	523.575	817	NA|HvDArTseq-3272675a1|Freq-10|744_0	NA	0	0	0	1	.	.	0
3433679a1	silicoDArT	3433679	2H	523.575	818	chr2H|HvDArTseq-3433679a1|Freq-10|0_535268767	chr2H	535268767	1	0	1	.	.	0
3257101a1	silicoDArT	3257101	2H	523.575	819	chr2H|HvDArTseq-3257101a1|Freq-10|0_535268767	chr2H	535268767	1	1	0	.	.	0
3268860a1	silicoDArT	3268860	2H	523.575	820	NA|HvDArTseq-3268860a1|Freq-10|5559_0	NA	0	0	1	0	.	.	0
3264981a1	silicoDArT	3264981	2H	523.575	821	chr2H|HvDArTseq-3264981a1|Freq-10|0_535496023	chr2H	535496023	1	1	0	.	.	3
3264024a1	silicoDArT	3264024	2H	528.314	822	NA|HvDArTseq-3264024a1|Freq-10|1108_0	NA	0	0	-	1	.	A allele inferred (non-parental).	0
4197868a1	silicoDArT	4197868	2H	531.647	823	NA|HvDArTseq-4197868a1|Freq-10|9473_0	NA	0	0	0	1	.	.	0
3264376a1	silicoDArT	3264376	2H	531.647	824	chr2H|HvDArTseq-3264376a1|Freq-10|0_537388184	chr2H	537388184	1	0	1	.	.	0
3271760a1	silicoDArT	3271760	2H	531.647	825	NA|HvDArTseq-3271760a1|Freq-10|4047_0	NA	0	0	0	1	.	.	0
3258948a1	SNP	3258948	2H	531.647	826	chr2H|HvDArTseq-3258948a1|Freq-10|0_537380636	chr2H	537380636	1	0	1	distorted	.	0
3267284a1	silicoDArT	3267284	2H	531.647	827	NA|HvDArTseq-3267284a1|Freq-10|3336_0	NA	0	0	1	0	.	.	3
6435899a1	silicoDArT	6435899	2H	531.647	828	chr2H|HvDArTseq-6435899a1|Freq-10|0_537671579	chr2H	537671579	1	1	0	.	.	0
3271865a1	silicoDArT	3271865	2H	531.647	829	NA|HvDArTseq-3271865a1|Freq-10|9993_0	NA	0	0	1	0	.	.	0
3274042a1	silicoDArT	3274042	2H	531.647	830	NA|HvDArTseq-3274042a1|Freq-10|2151_0	NA	0	0	1	0	.	.	0
5257234a1	silicoDArT	5257234	2H	532.548	831	chr2H|HvDArTseq-5257234a1|Freq-10|0_542380143	chr2H	542380143	1	0	1	.	.	0
6270711a1	silicoDArT	6270711	2H	532.548	832	NA|HvDArTseq-6270711a1|Freq-10|8595_0	NA	0	0	0	1	.	.	1
3273956a1	silicoDArT	3273956	2H	532.548	833	chr2H|HvDArTseq-3273956a1|Freq-10|0_542045647	chr2H	542045647	1	0	1	.	.	0
3258311a1	silicoDArT	3258311	2H	533.507	834	chr2H|HvDArTseq-3258311a1|Freq-10|0_549652532	chr2H	549652532	1	0	1	.	.	0
3931777a1	SNP	3931777	2H	534.069	835	chr2H|HvDArTseq-3931777a1|Freq-10|0_580132895	chr2H	580132895	1	0	2	.	.	17
5240186a2	SNP	5240186	2H	534.069	836	chr2H|HvDArTseq-5240186a2|Freq-10|0_542380143	chr2H	542380143	1	0	1	distorted	.	0
3273232a1	silicoDArT	3273232	2H	536.054	837	NA|HvDArTseq-3273232a1|Freq-10|6003_0	NA	0	0	1	0	.	.	0
5240186a1	silicoDArT	5240186	2H	536.054	838	chr2H|HvDArTseq-5240186a1|Freq-10|0_542380143	chr2H	542380143	1	1	0	.	.	0
11400951a1	silicoDArT	11400951	2H	536.054	839	chr2H|HvDArTseq-11400951a1|Freq-10|0_549652532	chr2H	549652532	1	1	0	.	.	0
3663848a1	silicoDArT	3663848	2H	536.054	840	NA|HvDArTseq-3663848a1|Freq-10|905_0	NA	0	0	1	0	.	.	0
3265995a1	silicoDArT	3265995	2H	537.233	841	NA|HvDArTseq-3265995a1|Freq-10|7153_0	NA	0	0	1	0	.	.	0
3433911a1	silicoDArT	3433911	2H	537.233	842	NA|HvDArTseq-3433911a1|Freq-10|1184_0	NA	0	0	1	0	.	.	0
3265125a1	silicoDArT	3265125	2H	537.233	843	NA|HvDArTseq-3265125a1|Freq-10|2158_0	NA	0	0	1	0	.	.	0
3255767a1	silicoDArT	3255767	2H	538.598	844	chr2H|HvDArTseq-3255767a1|Freq-10|0_541869759	chr2H	541869759	1	1	0	.	.	0
3932406a1	silicoDArT	3932406	2H	540.395	845	chr2H|HvDArTseq-3932406a1|Freq-10|0_562421481	chr2H	562421481	1	1	0	.	.	0
6435479a1	silicoDArT	6435479	2H	541.341	846	chr2H|HvDArTseq-6435479a1|Freq-10|0_571672090	chr2H	571672090	1	1	0	.	.	1
3263582a1	silicoDArT	3263582	2H	541.341	847	NA|HvDArTseq-3263582a1|Freq-10|788_0	NA	0	0	1	0	.	.	1
3263735a1	silicoDArT	3263735	2H	541.341	848	NA|HvDArTseq-3263735a1|Freq-10|758_0	NA	0	0	1	0	.	.	0
3664975a1	silicoDArT	3664975	2H	541.341	849	NA|HvDArTseq-3664975a1|Freq-10|8687_0	NA	0	0	1	0	.	.	0
3810843a1	silicoDArT	3810843	2H	541.341	850	chr2H|HvDArTseq-3810843a1|Freq-10|0_573306085	chr2H	573306085	1	1	0	.	.	0
4791329a1	silicoDArT	4791329	2H	541.341	851	chr2H|HvDArTseq-4791329a1|Freq-10|0_579639894	chr2H	579639894	1	1	0	.	.	0
3265467a1	silicoDArT	3265467	2H	541.341	852	chr2H|HvDArTseq-3265467a1|Freq-10|0_579107249	chr2H	579107249	1	1	0	.	.	0
3259361a1	SNP	3259361	2H	542.473	853	chr2H|HvDArTseq-3259361a1|Freq-10|0_583041502	chr2H	583041502	1	0	1	distorted	.	1
3985335a1	silicoDArT	3985335	2H	542.473	854	NA|HvDArTseq-3985335a1|Freq-10|10200_0	NA	0	0	0	1	.	.	0
3259466a1	SNP	3259466	2H	542.473	855	chr2H|HvDArTseq-3259466a1|Freq-10|0_583054626	chr2H	583054626	1	1	0	distorted	.	0
4174175a1	SNP	4174175	2H	543.825	856	chr2H|HvDArTseq-4174175a1|Freq-10|0_596307563	chr2H	596307563	1	1	0	distorted	.	0
3257355a1	SNP	3257355	2H	543.825	857	chr2H|HvDArTseq-3257355a1|Freq-10|0_592039423	chr2H	592039423	1	0	1	distorted	.	3
3396719a1	silicoDArT	3396719	2H	543.825	858	chr2H|HvDArTseq-3396719a1|Freq-10|0_591584500	chr2H	591584500	1	1	0	.	.	0
3263215a1	silicoDArT	3263215	2H	543.825	859	NA|HvDArTseq-3263215a1|Freq-10|9505_0	NA	0	0	1	0	.	.	0
4191051a1	silicoDArT	4191051	2H	543.825	860	chr2H|HvDArTseq-4191051a1|Freq-10|0_590804062	chr2H	590804062	1	1	0	.	.	0
3432601a1	silicoDArT	3432601	2H	545.158	861	NA|HvDArTseq-3432601a1|Freq-10|9603_0	NA	0	0	0	1	.	.	0
13142407a1	silicoDArT	13142407	2H	547.984	862	chr2H|HvDArTseq-13142407a1|Freq-10|0_612010093	chr2H	612010093	1	1	0	.	.	0
6436429a1	silicoDArT	6436429	2H	549.46	863	chr2H|HvDArTseq-6436429a1|Freq-10|0_620953976	chr2H	620953976	1	1	0	.	.	0
6283355a1	silicoDArT	6283355	2H	549.46	864	MM|HvDArTseq-6283355a1|Freq-10|242_0	MM	0	>2	1	0	.	.	0
3270294a1	silicoDArT	3270294	2H	550.676	865	MM|HvDArTseq-3270294a1|Freq-10|58_0	MM	0	>2	0	1	.	.	0
3265047a1	silicoDArT	3265047	2H	550.676	866	chr2H|HvDArTseq-3265047a1|Freq-10|0_621089756	chr2H	621089756	1	0	1	.	.	0
3270444a1	silicoDArT	3270444	2H	550.676	867	NA|HvDArTseq-3270444a1|Freq-10|5971_0	NA	0	0	0	-	.	B allele inferred (non-parental).	0
4170449a1	silicoDArT	4170449	2H	550.676	868	chr2H|HvDArTseq-4170449a1|Freq-10|0_613472598	chr2H	613472598	1	1	0	.	.	0
3266839a1	silicoDArT	3266839	2H	550.676	869	chr2H|HvDArTseq-3266839a1|Freq-10|0_618952931	chr2H	618952931	1	0	1	.	.	4
3664507a1	silicoDArT	3664507	2H	550.676	870	chr2H|HvDArTseq-3664507a1|Freq-10|0_612430514	chr2H	612430514	1	0	1	.	.	2
3930174a1	silicoDArT	3930174	2H	550.676	871	chr2H|HvDArTseq-3930174a1|Freq-10|0_619997752	chr2H	619997752	1	0	1	.	.	0
4790678a1	silicoDArT	4790678	2H	550.676	872	chr2H|HvDArTseq-4790678a1|Freq-10|0_612549267	chr2H	612549267	1	0	1	.	.	0
3272745a1	silicoDArT	3272745	2H	550.676	873	chr2H|HvDArTseq-3272745a1|Freq-10|0_613472598	chr2H	613472598	1	0	1	.	.	0
4188610a1	silicoDArT	4188610	2H	550.676	874	NA|HvDArTseq-4188610a1|Freq-10|9017_0	NA	0	0	0	1	.	.	0
3263010a1	SNP	3263010	2H	550.676	875	chr2H|HvDArTseq-3263010a1|Freq-10|0_610379157	chr2H	610379157	1	1	0	distorted	.	0
3259198a1	SNP	3259198	2H	550.676	876	chr2H|HvDArTseq-3259198a1|Freq-10|0_621113105	chr2H	621113105	1	1	0	distorted	.	0
3985921a1	silicoDArT	3985921	2H	551.826	877	chr2H|HvDArTseq-3985921a1|Freq-10|0_616730354	chr2H	616730354	1	0	1	.	.	0
3269628a1	silicoDArT	3269628	2H	553.242	878	chr2H|HvDArTseq-3269628a1|Freq-10|0_612008017	chr2H	612008017	1	0	1	.	.	0
7199763a1	silicoDArT	7199763	2H	554.594	879	NA|HvDArTseq-7199763a1|Freq-10|3586_0	NA	0	0	1	0	.	.	0
3258128a1	silicoDArT	3258128	2H	555.816	880	chr2H|HvDArTseq-3258128a1|Freq-10|0_614875797	chr2H	614875797	1	1	0	.	.	0
3398404a1	silicoDArT	3398404	2H	557.12	881	chr2H|HvDArTseq-3398404a1|Freq-10|0_610184846	chr2H	610184846	1	1	0	.	.	0
3397346a2	SNP	3397346	2H	558.139	882	NA|HvDArTseq-3397346a2|Freq-10|7474_0	NA	0	0	2	1	.	.	42
7243709a1	SNP	7243709	2H	558.701	883	chr2H|HvDArTseq-7243709a1|Freq-10|0_616911771	chr2H	616911771	1	2	1	.	.	0
3265325a1	SNP	3265325	2H	560.426	884	chr2H|HvDArTseq-3265325a1|Freq-10|0_603260293	chr2H	603260293	1	2	0	.	.	0
3258228a1	silicoDArT	3258228	2H	561.444	885	chr2H|HvDArTseq-3258228a1|Freq-10|0_597041498	chr2H	597041498	1	1	0	distorted	.	0
3911132a1	silicoDArT	3911132	2H	564.887	886	NA|HvDArTseq-3911132a1|Freq-10|9645_0	NA	0	0	1	0	.	.	0
3396523a1	SNP	3396523	2H	567.473	887	chr3H|HvDArTseq-3396523a1|Freq-10|0_26431536	chr3H	26431536	1	2	0	.	.	0
3931635a1	silicoDArT	3931635	2H	570.39	888	chr2H|HvDArTseq-3931635a1|Freq-10|0_630805859	chr2H	630805859	1	1	0	.	.	0
3257641a1	silicoDArT	3257641	2H	571.45	889	NA|HvDArTseq-3257641a1|Freq-10|2544_0	NA	0	0	0	1	.	.	0
4791523a1	silicoDArT	4791523	2H	571.45	890	NA|HvDArTseq-4791523a1|Freq-10|2988_0	NA	0	0	1	0	.	.	0
3259570a1	silicoDArT	3259570	2H	574.841	891	chr2H|HvDArTseq-3259570a1|Freq-10|0_626316622	chr2H	626316622	1	0	1	distorted	.	0
5339110a1	SNP	5339110	2H	577.598	892	NA|HvDArTseq-5339110a1|Freq-10|7857_0	NA	0	0	0	2	.	.	5
3999881a1	silicoDArT	3999881	2H	578.348	893	chr2H|HvDArTseq-3999881a1|Freq-10|0_628425885	chr2H	628425885	1	1	0	.	.	0
6436967a1	silicoDArT	6436967	2H	579.317	894	NA|HvDArTseq-6436967a1|Freq-10|10248_0	NA	0	0	1	0	.	.	0
3262866a1	silicoDArT	3262866	2H	579.317	895	chr2H|HvDArTseq-3262866a1|Freq-10|0_622606769	chr2H	622606769	1	1	0	.	.	1
3255877a1	silicoDArT	3255877	2H	579.317	896	chr2H|HvDArTseq-3255877a1|Freq-10|0_622778615	chr2H	622778615	1	1	0	.	.	0
5251335a1	silicoDArT	5251335	2H	580.654	897	NA|HvDArTseq-5251335a1|Freq-10|8697_0	NA	0	0	0	1	.	.	0
3272815a1	silicoDArT	3272815	2H	580.654	898	NA|HvDArTseq-3272815a1|Freq-10|9635_0	NA	0	0	0	1	.	.	0
3433526a1	silicoDArT	3433526	2H	580.654	899	NA|HvDArTseq-3433526a1|Freq-10|1563_0	NA	0	0	0	1	.	.	0
4789765a1	silicoDArT	4789765	2H	580.654	900	NA|HvDArTseq-4789765a1|Freq-10|2945_0	NA	0	0	0	1	.	.	0
3262148a1	SNP	3262148	2H	580.654	901	chr2H|HvDArTseq-3262148a1|Freq-10|0_621467696	chr2H	621467696	1	0	1	distorted	.	2
3921816a1	silicoDArT	3921816	2H	580.654	902	chr2H|HvDArTseq-3921816a1|Freq-10|0_621085942	chr2H	621085942	1	0	1	.	.	0
3810996a1	silicoDArT	3810996	2H	582.572	903	chr2H|HvDArTseq-3810996a1|Freq-10|0_637243057	chr2H	637243057	1	1	-	.	B allele inferred (non-parental).	0
3257880a1	SNP	3257880	2H	586.142	904	chr2H|HvDArTseq-3257880a1|Freq-10|0_635231910	chr2H	635231910	1	2	0	.	.	17
3256773a1	silicoDArT	3256773	2H	587.199	905	chr2H|HvDArTseq-3256773a1|Freq-10|0_631901430	chr2H	631901430	1	0	1	.	.	0
3263548a1	silicoDArT	3263548	2H	587.199	906	NA|HvDArTseq-3263548a1|Freq-10|7087_0	NA	0	0	0	1	.	.	0
3913215a2	SNP	3913215	2H	587.199	907	chr2H|HvDArTseq-3913215a2|Freq-10|0_636431603	chr2H	636431603	1	1	0	.	.	9
4016815a1	silicoDArT	4016815	2H	587.199	908	NA|HvDArTseq-4016815a1|Freq-10|7179_0	NA	0	0	0	1	.	.	0
3913215a1	silicoDArT	3913215	2H	587.199	909	chr2H|HvDArTseq-3913215a1|Freq-10|0_636431603	chr2H	636431603	1	0	1	.	.	0
3261182a1	silicoDArT	3261182	2H	587.199	910	chr2H|HvDArTseq-3261182a1|Freq-10|0_632692959	chr2H	632692959	1	0	1	.	.	0
3257408a1	SNP	3257408	2H	587.199	911	chr2H|HvDArTseq-3257408a1|Freq-10|0_635242786	chr2H	635242786	1	1	0	.	.	5
3929985a1	silicoDArT	3929985	2H	587.199	912	chr2H|HvDArTseq-3929985a1|Freq-10|0_637276437	chr2H	637276437	1	0	1	.	.	0
3268716a1	silicoDArT	3268716	2H	587.199	913	chr2H|HvDArTseq-3268716a1|Freq-10|0_636873863	chr2H	636873863	1	1	0	.	.	0
6270420a1	silicoDArT	6270420	2H	587.199	914	chr2H|HvDArTseq-6270420a1|Freq-10|0_636431603	chr2H	636431603	1	1	0	.	.	0
6435739a1	silicoDArT	6435739	2H	587.199	915	NA|HvDArTseq-6435739a1|Freq-10|6873_0	NA	0	0	1	0	.	.	0
4015805a1	silicoDArT	4015805	2H	587.199	916	chr2H|HvDArTseq-4015805a1|Freq-10|0_636873798	chr2H	636873798	1	1	0	.	.	0
5255279a1	silicoDArT	5255279	2H	587.199	917	chr2H|HvDArTseq-5255279a1|Freq-10|0_632227871	chr2H	632227871	1	0	1	.	.	0
3271705a1	silicoDArT	3271705	2H	587.199	918	NA|HvDArTseq-3271705a1|Freq-10|1643_0	NA	0	0	0	1	.	.	0
13142384a1	silicoDArT	13142384	2H	588.455	919	NA|HvDArTseq-13142384a1|Freq-10|3044_0	NA	0	0	1	0	.	.	0
4192923a1	silicoDArT	4192923	2H	590.188	920	NA|HvDArTseq-4192923a1|Freq-10|1539_0	NA	0	0	0	1	.	.	0
5248351a2	SNP	5248351	2H	591.333	921	NA|HvDArTseq-5248351a2|Freq-10|1597_0	NA	0	0	1	0	.	.	3
5248351a1	silicoDArT	5248351	2H	591.333	922	NA|HvDArTseq-5248351a1|Freq-10|4468_0	NA	0	0	0	1	.	.	0
4185199a1	silicoDArT	4185199	2H	591.333	923	NA|HvDArTseq-4185199a1|Freq-10|7395_0	NA	0	0	1	0	.	.	0
3255718a1	silicoDArT	3255718	2H	592.288	924	chr2H|HvDArTseq-3255718a1|Freq-10|0_639229613	chr2H	639229613	1	0	1	.	.	0
3430737a1	silicoDArT	3430737	2H	592.288	925	NA|HvDArTseq-3430737a1|Freq-10|2736_0	NA	0	0	0	1	.	.	0
3434100a1	SNP	3434100	2H	593.184	926	chr2H|HvDArTseq-3434100a1|Freq-10|0_639061734	chr2H	639061734	1	2	0	.	.	2
3267694a1	silicoDArT	3267694	2H	594.425	927	NA|HvDArTseq-3267694a1|Freq-10|2712_0	NA	0	0	1	0	.	.	0
3272301a1	silicoDArT	3272301	2H	594.425	928	NA|HvDArTseq-3272301a1|Freq-10|7900_0	NA	0	0	0	1	.	.	0
5249903a1	SNP	5249903	2H	594.425	929	chr2H|HvDArTseq-5249903a1|Freq-10|0_640234172	chr2H	640234172	1	0	1	distorted	.	0
3256340a1	silicoDArT	3256340	2H	594.425	930	NA|HvDArTseq-3256340a1|Freq-10|8540_0	NA	0	0	0	1	.	.	0
3259462a1	silicoDArT	3259462	2H	594.425	931	chr2H|HvDArTseq-3259462a1|Freq-10|0_640234107	chr2H	640234107	1	1	0	.	.	0
3274012a1	silicoDArT	3274012	2H	594.425	932	NA|HvDArTseq-3274012a1|Freq-10|7172_0	NA	0	0	1	0	.	.	0
3433428a1	silicoDArT	3433428	2H	594.425	933	NA|HvDArTseq-3433428a1|Freq-10|3172_0	NA	0	0	1	0	.	.	0
3809873a1	silicoDArT	3809873	2H	595.252	934	chr2H|HvDArTseq-3809873a1|Freq-10|0_642729633	chr2H	642729633	1	0	1	.	.	0
4015433a1	silicoDArT	4015433	2H	595.252	935	NA|HvDArTseq-4015433a1|Freq-10|4_0	NA	0	0	1	0	.	.	0
3265351a1	silicoDArT	3265351	2H	595.252	936	NA|HvDArTseq-3265351a1|Freq-10|2020_0	NA	0	0	0	1	.	.	0
3264857a1	silicoDArT	3264857	2H	595.252	937	NA|HvDArTseq-3264857a1|Freq-10|3685_0	NA	0	0	1	0	.	.	0
3259030a1	silicoDArT	3259030	2H	595.252	938	NA|HvDArTseq-3259030a1|Freq-10|9263_0	NA	0	0	0	1	.	.	0
3432794a1	silicoDArT	3432794	2H	595.252	939	NA|HvDArTseq-3432794a1|Freq-10|7228_0	NA	0	0	0	1	.	.	0
3927471a1	SNP	3927471	2H	596.065	940	chr2H|HvDArTseq-3927471a1|Freq-10|0_645602588	chr2H	645602588	1	1	0	.	.	0
5253576a1	silicoDArT	5253576	2H	596.065	941	chr2H|HvDArTseq-5253576a1|Freq-10|0_645624334	chr2H	645624334	1	1	0	.	.	0
3272136a1	silicoDArT	3272136	2H	598.509	942	NA|HvDArTseq-3272136a1|Freq-10|2313_0	NA	0	0	0	-	.	B allele inferred (non-parental).	0
3266486a2	SNP	3266486	2H	601.738	943	NA|HvDArTseq-3266486a2|Freq-10|562_0	NA	0	0	0	1	.	.	3
3985858a1	silicoDArT	3985858	2H	601.738	944	NA|HvDArTseq-3985858a1|Freq-10|8037_0	NA	0	0	0	1	.	.	0
11400483a1	silicoDArT	11400483	2H	602.835	945	chr2H|HvDArTseq-11400483a1|Freq-10|0_646273799	chr2H	646273799	2	1	0	.	.	0
3666784a1	silicoDArT	3666784	2H	604.981	946	chr2H|HvDArTseq-3666784a1|Freq-10|0_646241784	chr2H	646241784	2	0	1	.	.	0
5249852a1	SNP	5249852	2H	608.676	947	chr2H|HvDArTseq-5249852a1|Freq-10|0_647258146	chr2H	647258146	1	0	1	.	.	2
4186030a1	silicoDArT	4186030	2H	609.414	948	MM|HvDArTseq-4186030a1|Freq-10|258_0	MM	0	>2	1	0	.	.	0
4007332a1	silicoDArT	4007332	2H	611.02	949	chr2H|HvDArTseq-4007332a1|Freq-10|0_648023163	chr2H	648023163	1	1	0	.	.	0
5255030a1	silicoDArT	5255030	2H	611.826	950	chr2H|HvDArTseq-5255030a1|Freq-10|0_647694159	chr2H	647694159	1	0	1	.	.	0
3432747a1	SNP	3432747	2H	611.826	951	chr2H|HvDArTseq-3432747a1|Freq-10|0_648066286	chr2H	648066286	1	1	0	.	.	1
3259103a1	silicoDArT	3259103	2H	611.826	952	chr2H|HvDArTseq-3259103a1|Freq-10|0_647137087	chr2H	647137087	1	0	1	.	.	0
3255153a1	silicoDArT	3255153	2H	611.826	953	NA|HvDArTseq-3255153a1|Freq-10|10496_0	NA	0	0	0	1	.	.	0
7179981a1	silicoDArT	7179981	2H	611.826	954	NA|HvDArTseq-7179981a1|Freq-10|6807_0	NA	0	0	1	0	.	.	0
6435565a1	silicoDArT	6435565	2H	611.826	955	NA|HvDArTseq-6435565a1|Freq-10|1996_0	NA	0	0	1	0	.	.	0
4015571a1	silicoDArT	4015571	2H	614.018	956	chr2H|HvDArTseq-4015571a1|Freq-10|0_651468258	chr2H	651468258	1	0	1	.	.	0
3264184a1	silicoDArT	3264184	2H	616.697	957	chr2H|HvDArTseq-3264184a1|Freq-10|0_651676793	chr2H	651676793	1	0	1	.	.	0
3256467a1	silicoDArT	3256467	2H	616.697	958	chr2H|HvDArTseq-3256467a1|Freq-10|0_650883536	chr2H	650883536	1	1	0	.	.	0
3273951a1	silicoDArT	3273951	2H	616.697	959	NA|HvDArTseq-3273951a1|Freq-10|552_0	NA	0	0	0	1	.	.	0
4792852a1	SNP	4792852	2H	616.697	960	chr2H|HvDArTseq-4792852a1|Freq-10|0_650227821	chr2H	650227821	1	0	1	.	.	8
3268497a1	silicoDArT	3268497	2H	616.697	961	chr2H|HvDArTseq-3268497a1|Freq-10|0_651060228	chr2H	651060228	1	0	1	.	.	0
3272650a1	silicoDArT	3272650	2H	616.697	962	chr2H|HvDArTseq-3272650a1|Freq-10|0_653371322	chr2H	653371322	1	1	0	.	.	0
3661817a1	silicoDArT	3661817	2H	616.697	963	NA|HvDArTseq-3661817a1|Freq-10|84_0	NA	0	0	0	1	.	.	0
3272633a1	silicoDArT	3272633	2H	616.697	964	chr2H|HvDArTseq-3272633a1|Freq-10|0_676347596	chr2H	676347596	1	0	1	.	.	0
5255642a1	silicoDArT	5255642	2H	616.697	965	NA|HvDArTseq-5255642a1|Freq-10|1829_0	NA	0	0	0	1	.	.	0
4187079a1	silicoDArT	4187079	2H	616.697	966	NA|HvDArTseq-4187079a1|Freq-10|10304_0	NA	0	0	0	1	.	.	0
3262720a1	SNP	3262720	2H	616.697	967	NA|HvDArTseq-3262720a1|Freq-10|312_0	NA	0	0	0	1	.	.	0
11118327a1	silicoDArT	11118327	2H	618.697	968	NA|HvDArTseq-11118327a1|Freq-10|7590_0	NA	0	0	0	1	.	.	0
5253751a1	silicoDArT	5253751	2H	620.252	969	NA|HvDArTseq-5253751a1|Freq-10|2903_0	NA	0	0	0	1	.	.	0
4790424a1	silicoDArT	4790424	2H	621.351	970	NA|HvDArTseq-4790424a1|Freq-10|5506_0	NA	0	0	1	0	.	.	0
3254738a1	SNP	3254738	2H	621.351	971	NA|HvDArTseq-3254738a1|Freq-10|10192_0	NA	0	0	0	1	.	.	1
3987109a1	SNP	3987109	2H	621.351	972	chr2H|HvDArTseq-3987109a1|Freq-10|0_649520015	chr2H	649520015	1	1	0	.	.	0
7244355a1	silicoDArT	7244355	2H	621.351	973	chr2H|HvDArTseq-7244355a1|Freq-10|0_649557956	chr2H	649557956	1	0	1	.	.	0
3397186a2	SNP	3397186	2H	621.351	974	chr2H|HvDArTseq-3397186a2|Freq-10|0_650019747	chr2H	650019747	2	0	1	distorted	.	0
3258989a1	SNP	3258989	2H	621.351	975	chr2H|HvDArTseq-3258989a1|Freq-10|0_649557956	chr2H	649557956	1	0	1	.	.	5
3258989a2	SNP	3258989	2H	621.351	976	chr2H|HvDArTseq-3258989a2|Freq-10|0_649557956	chr2H	649557956	1	0	1	.	.	0
3397384a1	silicoDArT	3397384	2H	621.351	977	chr2H|HvDArTseq-3397384a1|Freq-10|0_650019747	chr2H	650019747	2	0	1	.	.	0
4793117a1	silicoDArT	4793117	2H	621.351	978	NA|HvDArTseq-4793117a1|Freq-10|4792_0	NA	0	0	1	0	.	.	0
3398872a1	SNP	3398872	2H	621.351	979	NA|HvDArTseq-3398872a1|Freq-10|4690_0	NA	0	0	0	1	.	.	0
3397186a1	silicoDArT	3397186	2H	622.227	980	chr2H|HvDArTseq-3397186a1|Freq-10|0_650019747	chr2H	650019747	2	1	0	.	.	0
5253438a1	silicoDArT	5253438	2H	624.192	981	NA|HvDArTseq-5253438a1|Freq-10|3427_0	NA	0	0	1	0	.	.	0
4792462a1	SNP	4792462	2H	626.232	982	chr2H|HvDArTseq-4792462a1|Freq-10|0_653534352	chr2H	653534352	1	0	1	distorted	.	0
3664470a1	silicoDArT	3664470	2H	627.696	983	NA|HvDArTseq-3664470a1|Freq-10|1253_0	NA	0	0	0	1	.	.	0
3271814a1	silicoDArT	3271814	2H	627.696	984	NA|HvDArTseq-3271814a1|Freq-10|6687_0	NA	0	0	0	1	.	.	0
3911999a1	SNP	3911999	2H	627.696	985	chr2H|HvDArTseq-3911999a1|Freq-10|0_654786925	chr2H	654786925	1	0	1	distorted	.	2
4782189a1	silicoDArT	4782189	2H	629.637	986	NA|HvDArTseq-4782189a1|Freq-10|3103_0	NA	0	0	0	-	.	B allele inferred (non-parental).	0
6276691a1	silicoDArT	6276691	2H	631.341	987	NA|HvDArTseq-6276691a1|Freq-10|1460_0	NA	0	0	1	0	.	.	1
3664107a1	silicoDArT	3664107	2H	633.574	988	NA|HvDArTseq-3664107a1|Freq-10|8795_0	NA	0	0	0	1	.	.	0
3396455a1	silicoDArT	3396455	2H	633.574	989	chr2H|HvDArTseq-3396455a1|Freq-10|0_656434569	chr2H	656434569	1	0	1	.	.	0
3264496a2	SNP	3264496	2H	633.574	990	chr2H|HvDArTseq-3264496a2|Freq-10|0_656434569	chr2H	656434569	1	0	1	distorted	.	1
3398015a1	silicoDArT	3398015	2H	634.761	991	chr2H|HvDArTseq-3398015a1|Freq-10|0_657020212	chr2H	657020212	1	1	0	.	.	0
3265454a1	silicoDArT	3265454	2H	636.505	992	NA|HvDArTseq-3265454a1|Freq-10|1687_0	NA	0	0	0	1	.	.	0
3986235a1	silicoDArT	3986235	2H	636.505	993	NA|HvDArTseq-3986235a1|Freq-10|8719_0	NA	0	0	0	1	.	.	0
3255737a1	SNP	3255737	2H	636.505	994	chr2H|HvDArTseq-3255737a1|Freq-10|0_660493056	chr2H	660493056	1	1	0	.	.	1
3918130a1	silicoDArT	3918130	2H	636.505	995	chr2H|HvDArTseq-3918130a1|Freq-10|0_659882009	chr2H	659882009	1	1	0	.	.	0
3256260a1	SNP	3256260	2H	636.505	996	chr2H|HvDArTseq-3256260a1|Freq-10|0_659970741	chr2H	659970741	1	1	0	distorted	.	0
3430802a1	silicoDArT	3430802	2H	637.988	997	chr2H|HvDArTseq-3430802a1|Freq-10|0_659683440	chr2H	659683440	1	0	1	.	.	0
3259528a1	silicoDArT	3259528	2H	640.919	998	chr2H|HvDArTseq-3259528a1|Freq-10|0_660492991	chr2H	660492991	1	1	0	.	.	0
3396312a1	silicoDArT	3396312	2H	642.61	999	chr2H|HvDArTseq-3396312a1|Freq-10|0_659585717	chr2H	659585717	1	1	0	.	.	0
3266100a1	silicoDArT	3266100	2H	642.61	1000	NA|HvDArTseq-3266100a1|Freq-10|6581_0	NA	0	0	0	1	.	.	0
4185107a1	silicoDArT	4185107	2H	642.61	1001	NA|HvDArTseq-4185107a1|Freq-10|1707_0	NA	0	0	0	1	.	.	0
3267514a1	silicoDArT	3267514	2H	642.61	1002	chr2H|HvDArTseq-3267514a1|Freq-10|0_656942715	chr2H	656942715	1	1	0	.	.	9
3256068a1	SNP	3256068	2H	642.61	1003	chr2H|HvDArTseq-3256068a1|Freq-10|0_658889880	chr2H	658889880	1	1	0	.	.	0
3268237a1	silicoDArT	3268237	2H	642.61	1004	chr2H|HvDArTseq-3268237a1|Freq-10|0_657021439	chr2H	657021439	1	1	0	.	.	0
4187547a1	silicoDArT	4187547	2H	643.766	1005	NA|HvDArTseq-4187547a1|Freq-10|2634_0	NA	0	0	0	1	.	.	0
4784414a1	silicoDArT	4784414	2H	643.766	1006	chr2H|HvDArTseq-4784414a1|Freq-10|0_661233570	chr2H	661233570	1	0	1	.	.	0
4198424a1	silicoDArT	4198424	2H	643.766	1007	NA|HvDArTseq-4198424a1|Freq-10|9118_0	NA	0	0	0	1	.	.	0
4184993a1	silicoDArT	4184993	2H	643.766	1008	chr2H|HvDArTseq-4184993a1|Freq-10|0_661572662	chr2H	661572662	1	0	1	.	.	0
3271465a1	silicoDArT	3271465	2H	646.059	1009	NA|HvDArTseq-3271465a1|Freq-10|5488_0	NA	0	0	0	1	.	.	0
3396159a1	silicoDArT	3396159	2H	648.859	1010	chr2H|HvDArTseq-3396159a1|Freq-10|0_661572436	chr2H	661572436	1	1	0	.	.	0
3398344a1	SNP	3398344	2H	648.859	1011	chr2H|HvDArTseq-3398344a1|Freq-10|0_662055672	chr2H	662055672	1	0	1	distorted	.	6
3256179a1	SNP	3256179	2H	648.859	1012	chr2H|HvDArTseq-3256179a1|Freq-10|0_661532674	chr2H	661532674	1	0	1	distorted	.	0
3265744a1	silicoDArT	3265744	2H	648.859	1013	chr2H|HvDArTseq-3265744a1|Freq-10|0_661572662	chr2H	661572662	1	1	0	.	.	0
5245317a1	silicoDArT	5245317	2H	651.966	1014	chr2H|HvDArTseq-5245317a1|Freq-10|0_664226025	chr2H	664226025	1	1	0	.	.	0
3398927a1	SNP	3398927	2H	653.239	1015	chr2H|HvDArTseq-3398927a1|Freq-10|0_664226090	chr2H	664226090	1	0	1	distorted	.	1
4006322a1	silicoDArT	4006322	2H	653.239	1016	NA|HvDArTseq-4006322a1|Freq-10|3938_0	NA	0	0	0	1	.	.	0
3923951a1	SNP	3923951	2H	657.011	1017	chr2H|HvDArTseq-3923951a1|Freq-10|0_666232516	chr2H	666232516	1	0	1	.	.	0
3262719a1	SNP	3262719	2H	657.011	1018	chr2H|HvDArTseq-3262719a1|Freq-10|0_666018628	chr2H	666018628	1	0	1	distorted	.	5
4186440a1	silicoDArT	4186440	2H	657.011	1019	NA|HvDArTseq-4186440a1|Freq-10|3056_0	NA	0	0	0	1	.	.	0
3917447a1	silicoDArT	3917447	2H	657.011	1020	chr2H|HvDArTseq-3917447a1|Freq-10|0_666198225	chr2H	666198225	1	1	0	.	.	0
6281564a1	SNP	6281564	2H	658.003	1021	chr2H|HvDArTseq-6281564a1|Freq-10|0_666875889	chr2H	666875889	1	1	0	distorted	.	0
3912237a1	SNP	3912237	2H	660.378	1022	chr2H|HvDArTseq-3912237a1|Freq-10|0_667661794	chr2H	667661794	2	0	1	distorted	.	1
3663065a1	silicoDArT	3663065	2H	663.174	1023	NA|HvDArTseq-3663065a1|Freq-10|883_0	NA	0	0	1	0	.	.	0
3398396a1	SNP	3398396	2H	663.174	1024	chr2H|HvDArTseq-3398396a1|Freq-10|0_671088062	chr2H	671088062	1	0	1	distorted	.	0
4006321a1	silicoDArT	4006321	2H	663.174	1025	chr2H|HvDArTseq-4006321a1|Freq-10|0_671081959	chr2H	671081959	1	0	1	.	.	0
3269998a1	silicoDArT	3269998	2H	663.174	1026	chr2H|HvDArTseq-3269998a1|Freq-10|0_671375811	chr2H	671375811	1	1	0	.	.	1
4192751a1	silicoDArT	4192751	2H	663.174	1027	NA|HvDArTseq-4192751a1|Freq-10|3996_0	NA	0	0	0	1	.	.	0
3270983a1	silicoDArT	3270983	2H	663.174	1028	chr2H|HvDArTseq-3270983a1|Freq-10|0_671375876	chr2H	671375876	1	1	0	.	.	0
5253937a1	silicoDArT	5253937	2H	663.174	1029	NA|HvDArTseq-5253937a1|Freq-10|4451_0	NA	0	0	1	0	.	.	0
3663555a1	silicoDArT	3663555	2H	664.461	1030	NA|HvDArTseq-3663555a1|Freq-10|7450_0	NA	0	0	1	0	.	.	0
3664982a1	silicoDArT	3664982	2H	666.167	1031	chr2H|HvDArTseq-3664982a1|Freq-10|0_670466647	chr2H	670466647	1	0	1	.	.	0
3396124a1	silicoDArT	3396124	2H	667.878	1032	chr7H|HvDArTseq-3396124a1|Freq-10|0_11607075	chr7H	11607075	1	0	1	.	.	0
4186934a1	silicoDArT	4186934	2H	667.878	1033	NA|HvDArTseq-4186934a1|Freq-10|8168_0	NA	0	0	0	1	.	.	0
4016262a1	SNP	4016262	2H	667.878	1034	chr2H|HvDArTseq-4016262a1|Freq-10|0_671999567	chr2H	671999567	1	1	0	.	.	0
3264061a1	silicoDArT	3264061	2H	667.878	1035	NA|HvDArTseq-3264061a1|Freq-10|7226_0	NA	0	0	0	1	.	.	0
3272907a1	SNP	3272907	2H	669.537	1036	chr2H|HvDArTseq-3272907a1|Freq-10|0_673349936	chr2H	673349936	1	1	0	distorted	.	0
3273573a1	SNP	3273573	2H	670.323	1037	chr2H|HvDArTseq-3273573a1|Freq-10|0_677095521	chr2H	677095521	1	1	0	.	.	0
3256871a1	silicoDArT	3256871	2H	670.323	1038	NA|HvDArTseq-3256871a1|Freq-10|1752_0	NA	0	0	0	1	.	.	14
3270467a1	silicoDArT	3270467	2H	670.323	1039	NA|HvDArTseq-3270467a1|Freq-10|10277_0	NA	0	0	0	1	.	.	0
3263992a1	silicoDArT	3263992	2H	670.323	1040	NA|HvDArTseq-3263992a1|Freq-10|9798_0	NA	0	0	1	0	.	.	0
3928936a1	silicoDArT	3928936	2H	670.323	1041	NA|HvDArTseq-3928936a1|Freq-10|5578_0	NA	0	0	0	1	.	.	0
3264553a1	silicoDArT	3264553	2H	670.323	1042	NA|HvDArTseq-3264553a1|Freq-10|1007_0	NA	0	0	1	0	.	.	0
3257470a1	SNP	3257470	2H	670.323	1043	chrUn|HvDArTseq-3257470a1|Freq-10|0_246836151	chrUn	246836151	1	0	1	.	.	0
3270164a1	silicoDArT	3270164	2H	670.323	1044	NA|HvDArTseq-3270164a1|Freq-10|158_0	NA	0	0	1	0	.	.	0
3266080a1	silicoDArT	3266080	2H	671.023	1045	chr2H|HvDArTseq-3266080a1|Freq-10|0_677251343	chr2H	677251343	1	0	1	.	.	0
3258244a1	silicoDArT	3258244	2H	671.023	1046	NA|HvDArTseq-3258244a1|Freq-10|1131_0	NA	0	0	0	1	.	.	0
3271670a1	silicoDArT	3271670	2H	672.112	1047	chrUn|HvDArTseq-3271670a1|Freq-10|0_246837384	chrUn	246837384	1	0	1	.	.	0
3396007a1	silicoDArT	3396007	2H	672.112	1048	chrUn|HvDArTseq-3396007a1|Freq-10|0_246825177	chrUn	246825177	1	0	1	.	.	0
3268321a1	silicoDArT	3268321	2H	673.239	1049	NA|HvDArTseq-3268321a1|Freq-10|8614_0	NA	0	0	1	0	.	.	0
3912379a1	SNP	3912379	2H	674.389	1050	NA|HvDArTseq-3912379a1|Freq-10|3609_0	NA	0	0	2	0	.	.	0
5250726a2	SNP	5250726	2H	676.717	1051	chr2H|HvDArTseq-5250726a2|Freq-10|0_678948913	chr2H	678948913	1	0	1	.	.	27
3433601a1	silicoDArT	3433601	2H	676.717	1052	NA|HvDArTseq-3433601a1|Freq-10|8174_0	NA	0	0	1	0	.	.	0
3267529a1	silicoDArT	3267529	2H	676.717	1053	NA|HvDArTseq-3267529a1|Freq-10|9346_0	NA	0	0	0	-	.	B allele inferred (non-parental).	0
3265778a1	silicoDArT	3265778	2H	677.279	1054	chr2H|HvDArTseq-3265778a1|Freq-10|0_681155023	chr2H	681155023	1	0	1	.	.	0
3433176a1	silicoDArT	3433176	2H	677.279	1055	NA|HvDArTseq-3433176a1|Freq-10|2743_0	NA	0	0	0	1	.	.	0
3432970a1	silicoDArT	3432970	2H	677.279	1056	chr2H|HvDArTseq-3432970a1|Freq-10|0_681155032	chr2H	681155032	1	1	0	.	.	0
3269340a1	silicoDArT	3269340	2H	677.279	1057	MM|HvDArTseq-3269340a1|Freq-10|197_0	MM	0	>2	0	1	.	.	0
3432546a1	SNP	3432546	2H	677.279	1058	chr2H|HvDArTseq-3432546a1|Freq-10|0_680984207	chr2H	680984207	1	0	1	.	.	10
3270836a1	silicoDArT	3270836	2H	677.279	1059	chr2H|HvDArTseq-3270836a1|Freq-10|0_679676407	chr2H	679676407	1	0	1	.	.	0
3255165a3	SNP	3255165	2H	678.015	1060	chr2H|HvDArTseq-3255165a3|Freq-10|0_682309158	chr2H	682309158	1	1	0	.	.	6
3987271a1	silicoDArT	3987271	2H	678.015	1061	chr2H|HvDArTseq-3987271a1|Freq-10|0_682345994	chr2H	682345994	1	-	0	.	A allele inferred (non-parental).	0
3433508a1	silicoDArT	3433508	2H	678.015	1062	chr7H|HvDArTseq-3433508a1|Freq-10|0_505377278	chr7H	505377278	1	0	1	.	.	0
4187159a1	silicoDArT	4187159	2H	678.015	1063	chr2H|HvDArTseq-4187159a1|Freq-10|0_682345994	chr2H	682345994	1	0	1	.	.	0
3255165a2	silicoDArT	3255165	2H	678.015	1064	chr2H|HvDArTseq-3255165a2|Freq-10|0_682309158	chr2H	682309158	1	0	1	.	.	0
5246813a1	silicoDArT	5246813	2H	679.931	1065	chr2H|HvDArTseq-5246813a1|Freq-10|0_682476462	chr2H	682476462	1	0	1	.	.	0
3430278a1	silicoDArT	3430278	2H	680.828	1066	NA|HvDArTseq-3430278a1|Freq-10|8181_0	NA	0	0	1	0	.	.	0
3257251a1	SNP	3257251	2H	680.828	1067	chr2H|HvDArTseq-3257251a1|Freq-10|0_682241542	chr2H	682241542	1	1	0	.	.	0
3265323a1	silicoDArT	3265323	2H	680.828	1068	NA|HvDArTseq-3265323a1|Freq-10|7726_0	NA	0	0	1	0	.	.	0
3265323a2	silicoDArT	3265323	2H	680.828	1069	NA|HvDArTseq-3265323a2|Freq-10|1599_0	NA	0	0	0	1	.	.	0
3274984a2	SNP	3274984	2H	682.62	1070	NA|HvDArTseq-3274984a2|Freq-10|5110_0	NA	0	0	1	0	.	.	0
4189449a1	silicoDArT	4189449	2H	682.62	1071	NA|HvDArTseq-4189449a1|Freq-10|10558_0	NA	0	0	0	1	.	.	0
4191791a1	silicoDArT	4191791	2H	683.42	1072	NA|HvDArTseq-4191791a1|Freq-10|6932_0	NA	0	0	1	0	.	.	0
5256614a1	silicoDArT	5256614	2H	683.42	1073	chr2H|HvDArTseq-5256614a1|Freq-10|0_683736437	chr2H	683736437	1	1	0	.	.	0
3260437a1	SNP	3260437	2H	683.42	1074	chr2H|HvDArTseq-3260437a1|Freq-10|0_684080595	chr2H	684080595	1	1	0	.	.	0
3811216a1	silicoDArT	3811216	2H	683.42	1075	NA|HvDArTseq-3811216a1|Freq-10|4840_0	NA	0	0	1	0	.	.	0
3263062a1	silicoDArT	3263062	2H	683.42	1076	chr2H|HvDArTseq-3263062a1|Freq-10|0_683736437	chr2H	683736437	1	0	1	.	.	0
3811307a1	silicoDArT	3811307	2H	683.42	1077	NA|HvDArTseq-3811307a1|Freq-10|3466_0	NA	0	0	1	0	.	.	0
3268579a1	silicoDArT	3268579	2H	684.225	1078	chr2H|HvDArTseq-3268579a1|Freq-10|0_685623440	chr2H	685623440	1	0	1	.	.	0
3267295a1	silicoDArT	3267295	2H	684.225	1079	NA|HvDArTseq-3267295a1|Freq-10|10339_0	NA	0	0	0	1	.	.	0
3264555a1	silicoDArT	3264555	2H	685.024	1080	chr2H|HvDArTseq-3264555a1|Freq-10|0_686661410	chr2H	686661410	1	1	0	.	.	6
7750097a1	SNP	7750097	2H	685.024	1081	NA|HvDArTseq-7750097a1|Freq-10|3332_0	NA	0	0	2	0	.	.	0
3268195a1	silicoDArT	3268195	2H	685.024	1082	NA|HvDArTseq-3268195a1|Freq-10|5649_0	NA	0	0	0	1	.	.	0
3811938a1	silicoDArT	3811938	2H	685.024	1083	chr2H|HvDArTseq-3811938a1|Freq-10|0_686483404	chr2H	686483404	1	1	0	.	.	0
7750098a1	silicoDArT	7750098	2H	685.024	1084	NA|HvDArTseq-7750098a1|Freq-10|3204_0	NA	0	0	1	0	.	.	0
3429795a1	silicoDArT	3429795	2H	685.024	1085	NA|HvDArTseq-3429795a1|Freq-10|9718_0	NA	0	0	1	0	.	.	0
3430555a1	silicoDArT	3430555	2H	685.024	1086	NA|HvDArTseq-3430555a1|Freq-10|8725_0	NA	0	0	1	0	.	.	0
3255670a1	silicoDArT	3255670	2H	685.024	1087	chr2H|HvDArTseq-3255670a1|Freq-10|0_685911661	chr2H	685911661	1	0	1	.	.	0
4193513a1	silicoDArT	4193513	2H	685.809	1088	chr2H|HvDArTseq-4193513a1|Freq-10|0_687238093	chr2H	687238093	1	1	0	.	.	0
3255783a2	SNP	3255783	2H	685.809	1089	chr2H|HvDArTseq-3255783a2|Freq-10|0_687347574	chr2H	687347574	1	1	0	.	.	6
6436558a1	silicoDArT	6436558	2H	686.517	1090	NA|HvDArTseq-6436558a1|Freq-10|4833_0	NA	0	0	1	0	.	.	0
3255783a1	silicoDArT	3255783	2H	687.653	1091	chr2H|HvDArTseq-3255783a1|Freq-10|0_687347574	chr2H	687347574	1	0	1	.	.	0
4791923a2	silicoDArT	4791923	2H	688.922	1092	NA|HvDArTseq-4791923a2|Freq-10|9191_0	NA	0	0	0	1	.	.	0
3255412a1	silicoDArT	3255412	2H	688.922	1093	NA|HvDArTseq-3255412a1|Freq-10|9285_0	NA	0	0	0	1	.	.	0
7174313a1	silicoDArT	7174313	2H	688.922	1094	chr2H|HvDArTseq-7174313a1|Freq-10|0_688785490	chr2H	688785490	1	0	1	.	.	0
4330591a1	silicoDArT	4330591	2H	689.928	1095	NA|HvDArTseq-4330591a1|Freq-10|4150_0	NA	0	0	0	1	.	.	0
3266841a1	silicoDArT	3266841	2H	691.996	1096	chr2H|HvDArTseq-3266841a1|Freq-10|0_687893083	chr2H	687893083	1	0	1	.	.	0
3257039a1	silicoDArT	3257039	2H	693.448	1097	chr2H|HvDArTseq-3257039a1|Freq-10|0_688553859	chr2H	688553859	1	0	-	.	B allele inferred (non-parental).	0
13142324a1	silicoDArT	13142324	2H	694.772	1098	chr2H|HvDArTseq-13142324a1|Freq-10|0_687997454	chr2H	687997454	1	0	-	.	B allele inferred (non-parental).	0
3262144a1	silicoDArT	3262144	2H	696.103	1099	chr2H|HvDArTseq-3262144a1|Freq-10|0_688594925	chr2H	688594925	1	0	1	.	.	0
6437149a2	SNP	6437149	2H	697.357	1100	chr2H|HvDArTseq-6437149a2|Freq-10|0_690026064	chr2H	690026064	1	2	1	.	.	1
3275395a1	silicoDArT	3275395	2H	698.04	1101	NA|HvDArTseq-3275395a1|Freq-10|2597_0	NA	0	0	0	1	.	.	0
3396656a1	silicoDArT	3396656	2H	698.04	1102	chr2H|HvDArTseq-3396656a1|Freq-10|0_691116836	chr2H	691116836	1	0	-	.	B allele inferred (non-parental).	0
3257089a1	SNP	3257089	2H	698.04	1103	chr2H|HvDArTseq-3257089a1|Freq-10|0_687996793	chr2H	687996793	1	1	0	.	.	31
3258441a2	SNP	3258441	2H	698.04	1104	chr2H|HvDArTseq-3258441a2|Freq-10|0_687583148	chr2H	687583148	1	1	0	.	.	1
3258441a1	silicoDArT	3258441	2H	698.04	1105	chr2H|HvDArTseq-3258441a1|Freq-10|0_687583148	chr2H	687583148	1	0	1	.	.	0
3268793a1	silicoDArT	3268793	2H	698.04	1106	chr2H|HvDArTseq-3268793a1|Freq-10|0_691311969	chr2H	691311969	1	1	0	.	.	0
3263630a1	SNP	3263630	2H	698.812	1107	chr2H|HvDArTseq-3263630a1|Freq-10|0_692341357	chr2H	692341357	1	1	0	.	.	9
4791178a1	silicoDArT	4791178	2H	698.812	1108	NA|HvDArTseq-4791178a1|Freq-10|7674_0	NA	0	0	-	0	.	A allele inferred (non-parental).	0
8600349a1	silicoDArT	8600349	2H	698.812	1109	NA|HvDArTseq-8600349a1|Freq-10|9153_0	NA	0	0	1	0	.	.	0
3917830a1	silicoDArT	3917830	2H	698.812	1110	NA|HvDArTseq-3917830a1|Freq-10|7006_0	NA	0	0	1	0	.	.	0
3397135a1	SNP	3397135	2H	698.812	1111	NA|HvDArTseq-3397135a1|Freq-10|2345_0	NA	0	0	1	0	.	.	0
3913681a1	SNP	3913681	2H	699.588	1112	chr2H|HvDArTseq-3913681a1|Freq-10|0_692550264	chr2H	692550264	1	1	0	.	.	0
3264473a1	silicoDArT	3264473	2H	700.862	1113	chr2H|HvDArTseq-3264473a1|Freq-10|0_692672945	chr2H	692672945	1	0	1	.	.	0
3259563a1	silicoDArT	3259563	2H	701.998	1114	NA|HvDArTseq-3259563a1|Freq-10|454_0	NA	0	0	1	0	.	.	0
3257301a1	SNP	3257301	2H	702.56	1115	chr2H|HvDArTseq-3257301a1|Freq-10|0_692493534	chr2H	692493534	1	1	0	.	.	10
3255367a1	SNP	3255367	2H	703.122	1116	chr2H|HvDArTseq-3255367a1|Freq-10|0_694118131	chr2H	694118131	1	1	0	.	.	9
5254097a1	silicoDArT	5254097	2H	703.122	1117	NA|HvDArTseq-5254097a1|Freq-10|6717_0	NA	0	0	1	0	.	.	0
3271850a1	silicoDArT	3271850	2H	703.122	1118	NA|HvDArTseq-3271850a1|Freq-10|7695_0	NA	0	0	1	0	.	.	0
3255753a1	SNP	3255753	2H	703.122	1119	chr2H|HvDArTseq-3255753a1|Freq-10|0_693328036	chr2H	693328036	1	1	0	.	.	0
3985866a1	SNP	3985866	2H	703.122	1120	NA|HvDArTseq-3985866a1|Freq-10|4155_0	NA	0	0	1	0	.	.	0
3269380a1	silicoDArT	3269380	2H	703.122	1121	chr2H|HvDArTseq-3269380a1|Freq-10|0_694117945	chr2H	694117945	1	0	1	.	.	0
3271790a1	silicoDArT	3271790	2H	703.122	1122	chr2H|HvDArTseq-3271790a1|Freq-10|0_693684631	chr2H	693684631	1	1	0	.	.	0
3666087a1	silicoDArT	3666087	2H	704.059	1123	chr2H|HvDArTseq-3666087a1|Freq-10|0_695052395	chr2H	695052395	1	0	1	.	.	0
4006772a1	silicoDArT	4006772	2H	705.99	1124	chr2H|HvDArTseq-4006772a1|Freq-10|0_694516756	chr2H	694516756	1	0	1	.	.	0
4015688a1	silicoDArT	4015688	2H	707.714	1125	chr2H|HvDArTseq-4015688a1|Freq-10|0_694516941	chr2H	694516941	1	0	1	.	.	0
3429929a1	silicoDArT	3429929	2H	708.292	1126	NA|HvDArTseq-3429929a1|Freq-10|9087_0	NA	0	0	1	0	.	.	0
3913480a1	silicoDArT	3913480	2H	708.292	1127	NA|HvDArTseq-3913480a1|Freq-10|6489_0	NA	0	0	1	0	.	.	0
3265172a1	silicoDArT	3265172	2H	708.292	1128	chr2H|HvDArTseq-3265172a1|Freq-10|0_693328101	chr2H	693328101	1	0	1	.	.	0
3913083a1	silicoDArT	3913083	2H	708.292	1129	chr2H|HvDArTseq-3913083a1|Freq-10|0_695588259	chr2H	695588259	1	0	1	.	.	0
6435813a1	silicoDArT	6435813	2H	708.292	1130	chr2H|HvDArTseq-6435813a1|Freq-10|0_695588259	chr2H	695588259	1	1	0	.	.	0
3430155a1	silicoDArT	3430155	2H	708.292	1131	NA|HvDArTseq-3430155a1|Freq-10|4832_0	NA	0	0	0	1	.	.	0
6437748a1	silicoDArT	6437748	2H	708.292	1132	NA|HvDArTseq-6437748a1|Freq-10|10018_0	NA	0	0	1	0	.	.	0
3431398a2	SNP	3431398	2H	708.292	1133	chr2H|HvDArTseq-3431398a2|Freq-10|0_695401481	chr2H	695401481	1	2	1	.	.	0
13142363a1	silicoDArT	13142363	2H	710.357	1134	chr2H|HvDArTseq-13142363a1|Freq-10|0_695809841	chr2H	695809841	1	1	0	.	.	0
6436968a1	silicoDArT	6436968	2H	712.497	1135	NA|HvDArTseq-6436968a1|Freq-10|8182_0	NA	0	0	1	0	.	.	0
7228224a1	silicoDArT	7228224	2H	712.497	1136	NA|HvDArTseq-7228224a1|Freq-10|2180_0	NA	0	0	1	0	.	.	0
5250827a1	silicoDArT	5250827	2H	712.497	1137	NA|HvDArTseq-5250827a1|Freq-10|9727_0	NA	0	0	0	1	.	.	0
3270069a1	silicoDArT	3270069	2H	712.497	1138	NA|HvDArTseq-3270069a1|Freq-10|698_0	NA	0	0	1	0	.	.	0
6436147a1	silicoDArT	6436147	2H	712.497	1139	NA|HvDArTseq-6436147a1|Freq-10|10407_0	NA	0	0	1	0	.	.	0
3985519a1	silicoDArT	3985519	2H	712.497	1140	NA|HvDArTseq-3985519a1|Freq-10|10478_0	NA	0	0	0	1	.	.	0
6435816a1	silicoDArT	6435816	2H	712.497	1141	NA|HvDArTseq-6435816a1|Freq-10|8657_0	NA	0	0	1	0	.	.	0
3662405a1	silicoDArT	3662405	2H	712.497	1142	NA|HvDArTseq-3662405a1|Freq-10|9485_0	NA	0	0	1	0	.	.	0
4594865a1	silicoDArT	4594865	2H	712.497	1143	chr2H|HvDArTseq-4594865a1|Freq-10|0_696232231	chr2H	696232231	1	1	0	.	.	0
3986403a1	silicoDArT	3986403	2H	712.497	1144	chr2H|HvDArTseq-3986403a1|Freq-10|0_696253757	chr2H	696253757	1	0	1	.	.	0
3433475a1	silicoDArT	3433475	2H	712.497	1145	chr2H|HvDArTseq-3433475a1|Freq-10|0_696253692	chr2H	696253692	1	0	1	.	.	0
3256224a1	silicoDArT	3256224	2H	712.497	1146	NA|HvDArTseq-3256224a1|Freq-10|1848_0	NA	0	0	1	0	.	.	0
3924263a1	SNP	3924263	2H	712.497	1147	NA|HvDArTseq-3924263a1|Freq-10|1833_0	NA	0	0	1	0	.	.	0
3661931a1	silicoDArT	3661931	2H	712.497	1148	chr2H|HvDArTseq-3661931a1|Freq-10|0_696232240	chr2H	696232240	1	0	1	.	.	0
[truncated: 6,611 more rows]
